# Supplementary material for: Bio-based synthesis of cyclopentane-1,3-diamine and its application in bifunctional monomers for poly-condensation
Source: Royal Society of Chemistry journal article supplement (doi:10.1039/d1gc02372a), 2021-01-01
Supplement: d1gc02372a1.pdf [file d1gc02372a1.pdf]

## Supporting Information

### Bio-based Synthesis of Cyclopentane-1,3-diamine and its Application in Bifunctional Monomers for Poly-condensation

Christian. A. M. R. van Slagmaat\*, Jurrie Noordijk, Luciano G. Monsegue, Siri Mogensen, Gerard K. M. Verzijl, Peter J. L. M Quaedflieg, Paul L. Alsters, and Stefaan M. A. De Wildeman\*

#### Contents:

|      |                                                                    |     |
|------|--------------------------------------------------------------------|-----|
| S1.  | Materials and Methods                                              | S2  |
| S1.1 | <i>Chemicals</i>                                                   | S2  |
| S1.2 | <i>Decomposition study of CPDX</i>                                 | S3  |
| S1.3 | <i>Overview of attempted hydrogenation reactions to yield CPDA</i> | S3  |
| S2.  | Analytical raw data                                                | S6  |
| S2.1 | <i>NMR spectroscopy</i>                                            | S6  |
| S2.2 | <i>FT-IR spectroscopy.</i>                                         | S30 |
| S2.3 | <i>GC-FID chromatograms.</i>                                       | S39 |
| S2.4 | <i>High Resolution Mass Spectrometry (HR-MS).</i>                  | S40 |
| S2.5 | <i>Gel Permeation Chromatography (GPC).</i>                        | S51 |
| S2.6 | <i>Thermogravic Analysis (TGA)</i>                                 | S52 |
| S2.7 | <i>Differential Scanning Calorimetry (DSC)</i>                     | S53 |

## S1. Materials and Methods

### S1.1 Chemicals:

NOTE: All chemicals were used as received from the supplier without purification, unless stated otherwise (see section S1.2).

Ruthenium on carbon (5wt%, Strem Chemicals), Rhodium on carbon (5wt%, Sigma Aldrich), Palladium on carbon (10wt%, Sigma Aldrich), Platinum on carbon (5wt%, Sigma Aldrich), Ruthenium on alumina (5wt%, Sigma Aldrich), Heterogeneous Palladium Catalysts Kit I (Sigma Aldrich), Iridium on carbon (1wt% Sigma Aldrich), Shvo catalyst (98%, Strem Chemicals), Ru-BINAP-(OAc)<sub>2</sub> (98% Sigma Aldrich), Ru-BINAP-(Cl)-cymene (98% Sigma Aldrich), (Ir-COD-Cl)<sub>2</sub> (97% Sigma Aldrich), triphenylphosphine (99% Sigma Aldrich), 1,3-bis(diphenylphosphanyl)propane (97%, Sigma Aldrich), Josiphos SL-J002-1 (>97%, Sigma Aldrich), Zinc powder (60 – 200 µm mesh, 99+%, Sigma Aldrich), Furfuryl alcohol (97%, Acros), Cyclopentane-1,3-dione (95%, Matrix Chemicals Inc.), benzylamine (99%, Sigma Aldrich), Ammonia in dry methanol (7M, Sigma Aldrich), Hydroxylamine hydrochloride (98%), Hydrazine (50 – 60% in water, Sigma Aldrich), Acetic acid (>99.0%, VWR), *cis*-cyclopentane-1,3-diamine (98.5%, Matrix Chemicals Inc.), *trans*-cyclopentane-1,3-diamine (98.5%, Matrix Chemicals Inc.),  $\gamma$ -butyrolactone (99.5%, Fischer Scientific),  $\gamma$ -valerolactone (99%, Sigma Aldrich),  $\gamma$ -decalactone (98%, Sigma Aldrich), 5-Hydroxymethylfurfural (>98.5%, Matrix Chemicals Inc.), Diethyl adipate (>99%, Sigma Aldrich), Dimethyl isophthalate (99%, Sigma Aldrich), toluene-2,4-diisocyanate (95%, Sigma Aldrich), hexamethylene-1,6-diisocyanate (>99%, Sigma Aldrich), Methanol (HPLC grade, Biosolve) Ethanol (96%, VWR), isopropanol (HPLC grade, Biosolve), *s*-butanol (99%, Acros), *t*-butanol ( $\geq$ 99.0%, Sigma Aldrich), Ethyl acetate (HPLC grade, Biosolve), Cyclopentyl methyl ether (99%, Sigma Aldrich), Methyl *tert*-butyl ether (99%, Sigma Aldrich) 1,4-Dioxane (99.8%, Acros), Tetrahydrofuran (HPLC grade, Biosolve), 2-Methyltetrahydrofuran (>99%, dry, Sigma Aldrich), Toluene (HPLC grade, Biosolve), Heptane (99.5%, Sigma Aldrich), (Chloroform (HPLC grade, Biosolve), DMSO (>99%, dry, Sigma Aldrich). Naphthalene ( $\geq$ 99%, Alfa Aesar), Acetonitrile (LCMS grade, Biosolve), Celite® R566 (Acros), Silica (60 – 200 µm mesh, Acros), Hexane (HPLC grade, Biosolve), deuterium oxide (99.96%, Cambridge Isotope Laboratories), deuterated chloroform (99.96% Cambridge Isotope Laboratories), deuterated dimethyl sulfoxide (>99.7%, Fisher Scientific).

### SI.2 Decomposition study of CPDX:

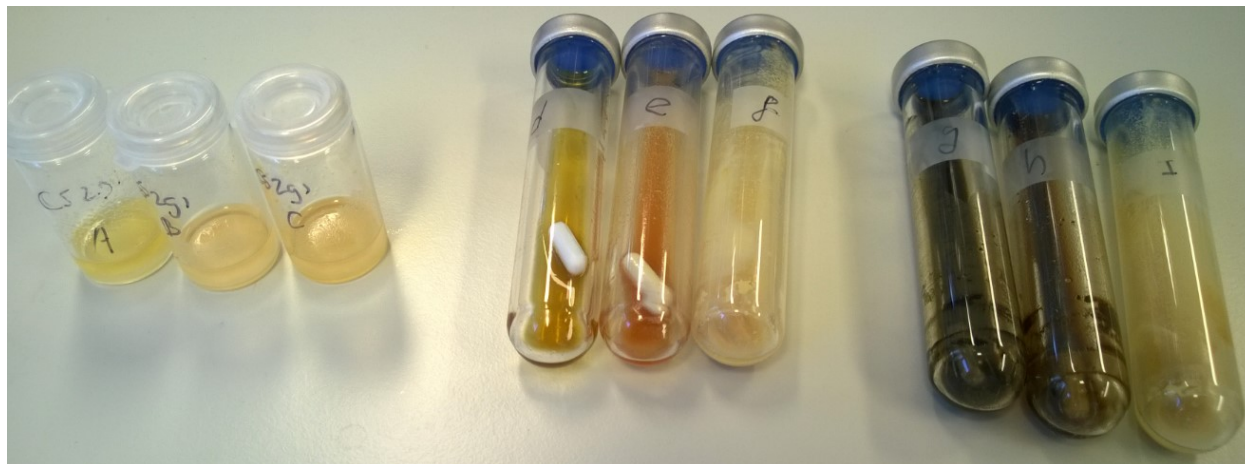

Figure SI.3.1: Photograph of decomposition studies for CPDX. Left triplet: 20°C; Middle triplet: 40°C; Right triplet: 60°C. Each triplet contains the solvents MeOH, THF, and toluene from left to right.

### SI.3 Overview of attempted hydrogenation reactions to yield CPDA:

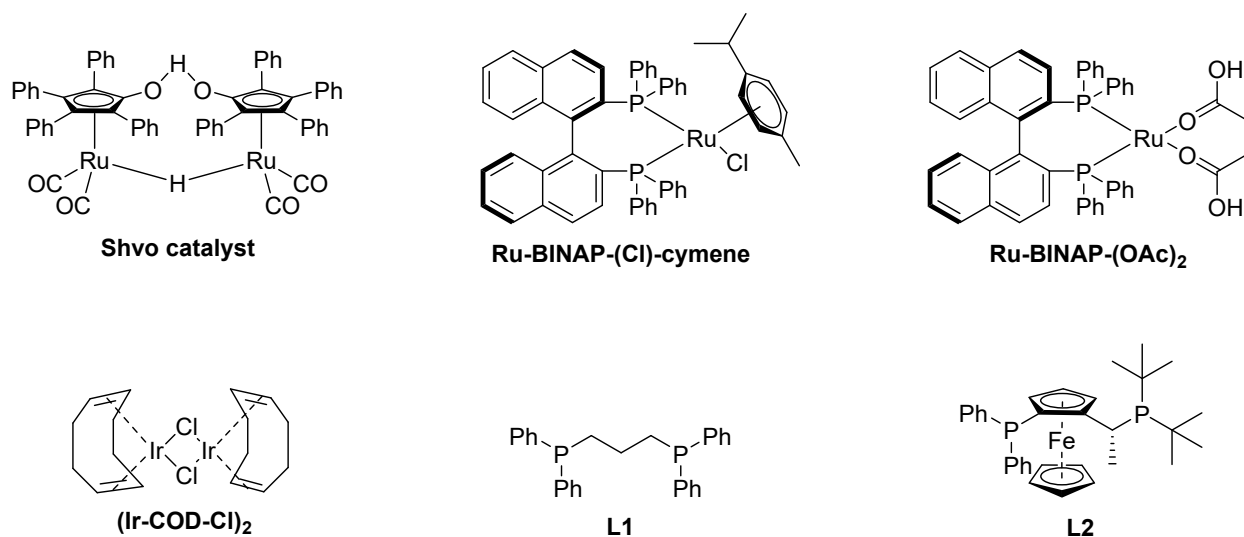

Figure SI.3.1: Tested homogeneous catalysts and ligands for the hydrogenation towards CPDA.

Table SI.3.1: List of attempted hydrogenation reactions of CPDI to afford CPDA:

| Catalyst<br>(Cat. / Sub.)   | Additive                                           | Solvent | P <sub>H2</sub><br>(bar) | T<br>(°C) | t<br>(h) | Stirring<br>(rpm) | Result                             |
|-----------------------------|----------------------------------------------------|---------|--------------------------|-----------|----------|-------------------|------------------------------------|
| Shvo cat. (1%)              | -                                                  | iPrOH   | 60                       | 100       | 20       | 300               | partial hydrog.                    |
| Shvo cat. (1%)              | -                                                  | iPrOH   | 55                       | 80        | 20       | 300               | no reaction                        |
| Ru/C (10 wt%)               | -                                                  | MeOH    | 50                       | 80        | 20       | 300               | no reaction                        |
| Rh/C (10 wt%)               | -                                                  | MeOH    | 50                       | 80        | 20       | 300               | no reaction                        |
| Pd/C (10 wt%)               | -                                                  | MeOH    | 50                       | 80        | 20       | 300               | no reaction                        |
| Pt/C (10 wt%)               | -                                                  | MeOH    | 50                       | 80        | 20       | 300               | no reaction                        |
| Ru/C (10 wt%)               | -                                                  | iPrOH   | 50                       | 100       | 18       | 300               | partial hydrog.<br>+ side products |
| Rh/C (10 wt%)               | -                                                  | iPrOH   | 50                       | 100       | 18       | 300               | side products                      |
| Pd/C (10 wt%)               | -                                                  | iPrOH   | 50                       | 100       | 18       | 300               | partial hydrog.<br>+ side products |
| Pt/C (10 wt%)               | -                                                  | iPrOH   | 50                       | 100       | 18       | 300               | side products                      |
| Pd/C (10 wt%)               | -                                                  | water   | 50                       | 100       | 18       | 300               | partial hydrog.<br>+ side products |
| Pd/C (10 wt%)               | -                                                  | EtOAc   | 50                       | 100       | 18       | 300               | partial hydrog.<br>+ side products |
| Pd/C (10 wt%)               | -                                                  | THF     | 50                       | 100       | 18       | 300               | partial hydrog.<br>+ side products |
| Pd/C (10 wt%)               | -                                                  | toluene | 50                       | 100       | 18       | 300               | partial hydrog.<br>+ side products |
| Ru-BINAP-(OAc) <sub>2</sub> | -                                                  | THF     | 50                       | 50        | 22       | 300               | no reaction                        |
| Ru-BINAP-(Cl)-cymene        | -                                                  | THF     | 50                       | 50        | 22       | 300               | no reaction                        |
| {Ir(COD)Cl} <sub>2</sub>    | -                                                  | EtOAc   | 50                       | 50        | 3        | 300               | no reaction                        |
| {Ir(COD)Cl} <sub>2</sub>    | PPh <sub>3</sub> (4 eq)                            | EtOAc   | 50                       | 50        | 3        | 300               | no reaction                        |
| {Ir(COD)Cl} <sub>2</sub>    | <b>L1</b> (2 eq)                                   | EtOAc   | 50                       | 50        | 3        | 300               | no reaction                        |
| {Ir(COD)Cl} <sub>2</sub>    | <b>L2</b> (2 eq)                                   | EtOAc   | 50                       | 50        | 3        | 300               | no reaction                        |
| {Ir(COD)Cl} <sub>2</sub>    | -                                                  | MeOH    | 50                       | 50        | 20       | 300               | no reaction                        |
| {Ir(COD)Cl} <sub>2</sub>    | PPh <sub>3</sub> (4 eq)                            | MeOH    | 50                       | 50        | 20       | 300               | no reaction                        |
| {Ir(COD)Cl} <sub>2</sub>    | <b>L1</b> (2 eq)                                   | MeOH    | 50                       | 50        | 20       | 300               | no reaction                        |
| {Ir(COD)Cl} <sub>2</sub>    | <b>L2</b> (2 eq)                                   | MeOH    | 50                       | 50        | 20       | 300               | no reaction                        |
| {Ir(COD)Cl} <sub>2</sub>    | I <sub>2</sub> (8 eq)                              | MeOH    | 50                       | 50        | 20       | 300               | no reaction                        |
| {Ir(COD)Cl} <sub>2</sub>    | PPh <sub>3</sub> (4 eq)<br>+ I <sub>2</sub> (8 eq) | MeOH    | 50                       | 50        | 20       | 300               | no reaction                        |
| {Ir(COD)Cl} <sub>2</sub>    | <b>L1</b> (2 eq)<br>+ I <sub>2</sub> (8 eq)        | MeOH    | 50                       | 50        | 20       | 300               | no reaction                        |
| {Ir(COD)Cl} <sub>2</sub>    | <b>L2</b> (2 eq)<br>+ I <sub>2</sub> (8 eq)        | MeOH    | 50                       | 50        | 20       | 300               | no reaction                        |

Table SI.3.2: List of attempted hydrogenation reactions of CPDX to afford CPDA:

| Catalyst<br>(Cat. / Sub.)                  | Additive             | Solvent           | P <sub>H2</sub><br>(bar) | T<br>(°C) | t<br>(h) | Stirring<br>(rpm) | Result                           |
|--------------------------------------------|----------------------|-------------------|--------------------------|-----------|----------|-------------------|----------------------------------|
| Zn                                         | HCl                  | water             | N/A                      | 20        | 24       | 500               | no reaction                      |
| Zn                                         | AcOH                 | water             | N/A                      | 20        | 24       | 500               | no reaction                      |
| Shvo cat. (5%)                             | -                    | MeOH              | 55                       | 80        | 20       | 300               | no reaction                      |
| Ru/C (10 wt%)                              | -                    | MeOH              | 30                       | 80        | 20       | 300               | decomposition                    |
| Rh/C (10 wt%)                              | -                    | MeOH              | 30                       | 80        | 20       | 300               | decomposition<br>+ trace product |
| Pd/C (10 wt%)                              | -                    | MeOH              | 30                       | 80        | 20       | 300               | decomposition                    |
| Pt/C (10 wt%)                              | -                    | MeOH              | 30                       | 80        | 20       | 300               | decomposition                    |
| Ru/C (10 wt%)                              | -                    | THF               | 50                       | 20        | 20       | 300               | no reaction                      |
| Rh/C (10 wt%)                              | -                    | THF               | 50                       | 20        | 20       | 300               | no reaction                      |
| Pd/C (10 wt%)                              | -                    | THF               | 50                       | 20        | 20       | 300               | decomposition                    |
| Pt/C (10 wt%)                              | -                    | THF               | 50                       | 20        | 20       | 300               | decomposition                    |
| Ru/C (10 wt%)                              | -                    | THF               | 50                       | 40        | 20       | 300               | decomposition                    |
| Rh/C (10 wt%)                              | -                    | THF               | 50                       | 40        | 20       | 300               | product                          |
| Pd/C (10 wt%)                              | -                    | THF               | 50                       | 40        | 20       | 300               | decomposition                    |
| Pt/C (10 wt%)                              | -                    | THF               | 50                       | 40        | 20       | 300               | decomposition                    |
| Ru/C (10 wt%)                              | -                    | THF               | 50                       | 40        | 20       | 300               | decomposition                    |
| Rh/C (10 wt%)                              | -                    | THF               | 50                       | 40        | 20       | 300               | product                          |
| Pd/C (10 wt%)                              | -                    | THF               | 50                       | 40        | 20       | 300               | decomposition                    |
| Pt/C (10 wt%)                              | -                    | THF               | 50                       | 40        | 20       | 300               | decomposition                    |
| Ru/Al <sub>2</sub> O <sub>3</sub> (10 wt%) | -                    | THF               | 50                       | 40        | 20       | 300               | no reaction                      |
| Pt/Al <sub>2</sub> O <sub>3</sub> (10 wt%) | -                    | THF               | 50                       | 40        | 20       | 300               | decomposition                    |
| Pd/Al <sub>2</sub> O <sub>3</sub> (10 wt%) | -                    | THF               | 50                       | 40        | 20       | 300               | decomposition                    |
| Pd/CaCO <sub>3</sub> (10 wt%)              | -                    | THF               | 50                       | 40        | 20       | 300               | decomposition                    |
| Pd/BaSO <sub>4</sub> (10 wt%)              | -                    | THF               | 50                       | 40        | 20       | 300               | decomposition                    |
| Pd(OH) <sub>2</sub> /C (10 wt%)            | -                    | THF               | 50                       | 40        | 20       | 300               | decomposition                    |
| Ir/C (20 wt%)                              | -                    | THF               | 50                       | 40        | 20       | 300               | no reaction                      |
| Rh/C (10 wt%)                              | -                    | 2-MeTHF           | 50                       | 40        | 20       | 300               | product                          |
| Rh/C (10 wt%)                              | -                    | MTBE              | 50                       | 40        | 20       | 300               | product                          |
| Rh/C (10 wt%)                              | -                    | CPME              | 50                       | 40        | 20       | 300               | product                          |
| Rh/C (10 wt%)                              | -                    | water             | 50                       | 40        | 20       | 300               | product                          |
| Rh/C (10 wt%)                              | -                    | MeOH              | 50                       | 40        | 20       | 300               | product                          |
| Rh/C (10 wt%)                              | -                    | EtOH              | 50                       | 40        | 20       | 300               | product                          |
| Rh/C (10 wt%)                              | -                    | iPrOH             | 50                       | 40        | 20       | 300               | product                          |
| Rh/C (10 wt%)                              | -                    | tBuOH             | 50                       | 40        | 20       | 300               | product                          |
| Rh/C (10 wt%)                              | -                    | EtOAc             | 50                       | 40        | 20       | 300               | product                          |
| Rh/C (10 wt%)                              | -                    | toluene           | 50                       | 40        | 20       | 300               | product                          |
| Rh/C (10 wt%)                              | -                    | dioxane           | 50                       | 40        | 20       | 300               | product                          |
| Rh/C (10 wt%)                              | -                    | dioxolane         | 50                       | 40        | 20       | 300               | decomposition                    |
| Rh/C (10 wt%)                              | -                    | DMSO              | 50                       | 40        | 20       | 300               | decomposition                    |
| Rh/C (10 wt%)                              | -                    | DMF               | 50                       | 40        | 20       | 300               | trace product                    |
| Rh/C (10 wt%)                              | -                    | CHCl <sub>3</sub> | 50                       | 40        | 20       | 300               | trace product                    |
| Rh/C (10 wt%)                              | 7M NH <sub>3</sub>   | water             | 50                       | 40        | 20       | 300               | no reaction                      |
| Rh/C (10 wt%)                              | 3.5M NH <sub>3</sub> | water/MeOH        | 50                       | 40        | 20       | 300               | trace product                    |
| Rh/C (10 wt%)                              | -                    | water/MeOH        | 50                       | 40        | 20       | 300               | product                          |

## S2. Substrate analysis:

### S2.1 NMR spectroscopy:

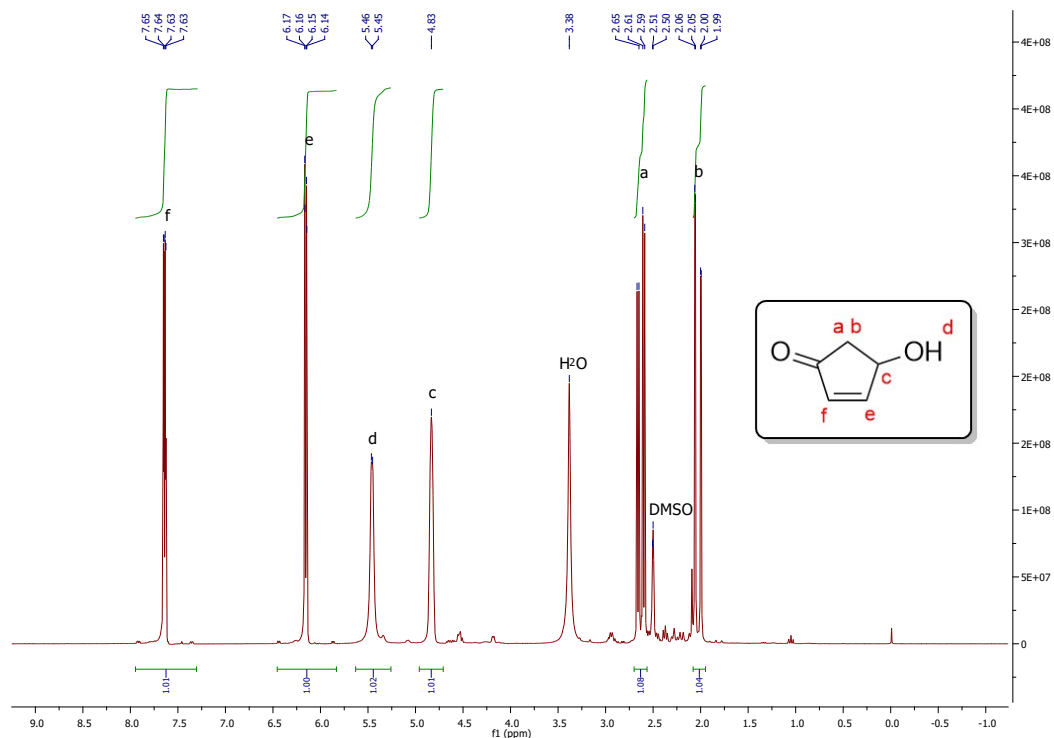

Figure S2.1.1:  $^1\text{H-NMR}$  spectrum of 4-HCP in  $\text{DMSO-d}_6$ .

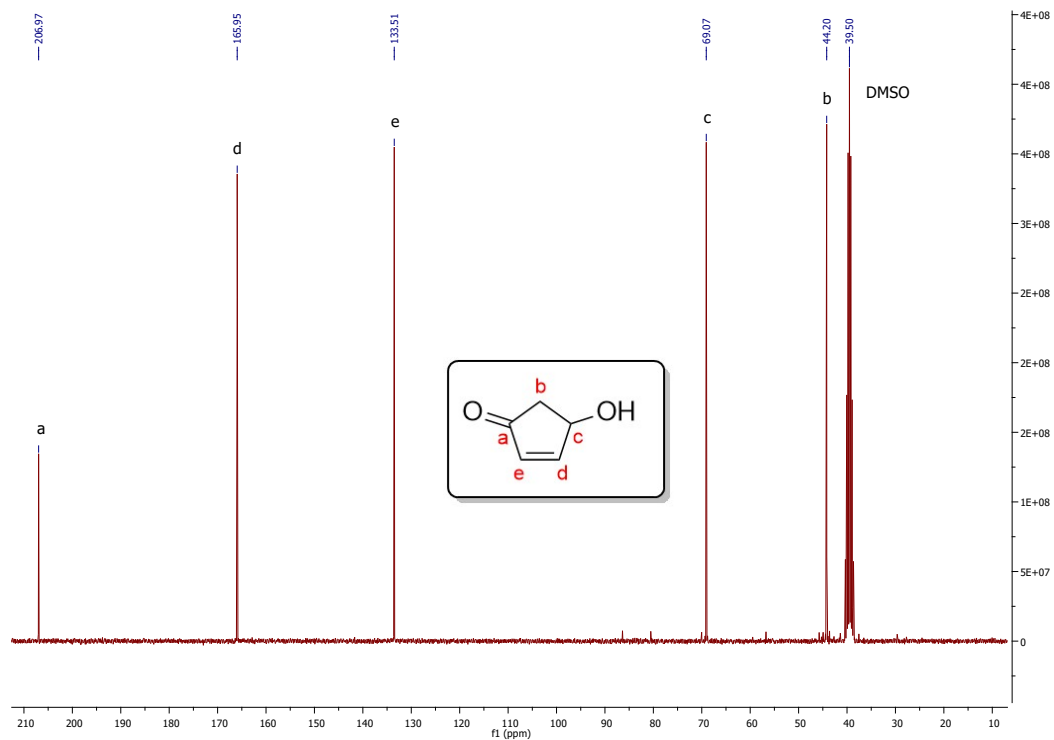

Figure S2.1.2:  $^{13}\text{C-NMR}$  spectrum of 4-HCP in  $\text{DMSO-d}_6$ .

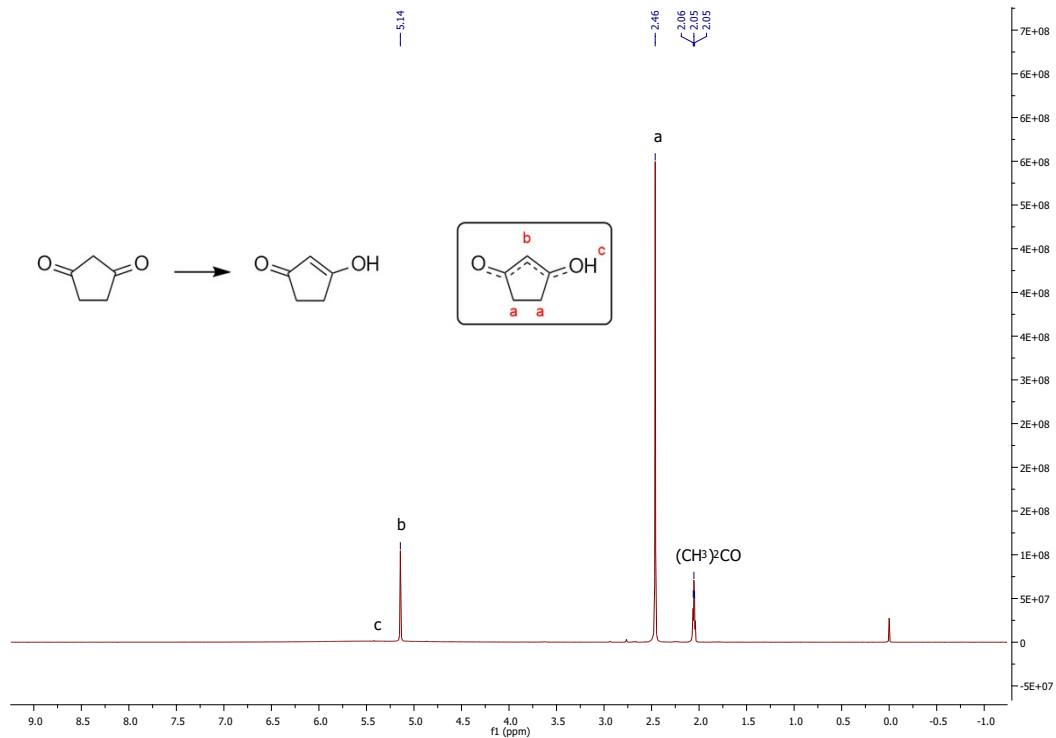

Figure S2.1.3:  $^1\text{H-NMR}$  spectrum of CPDO in acetone- $d_6$ .

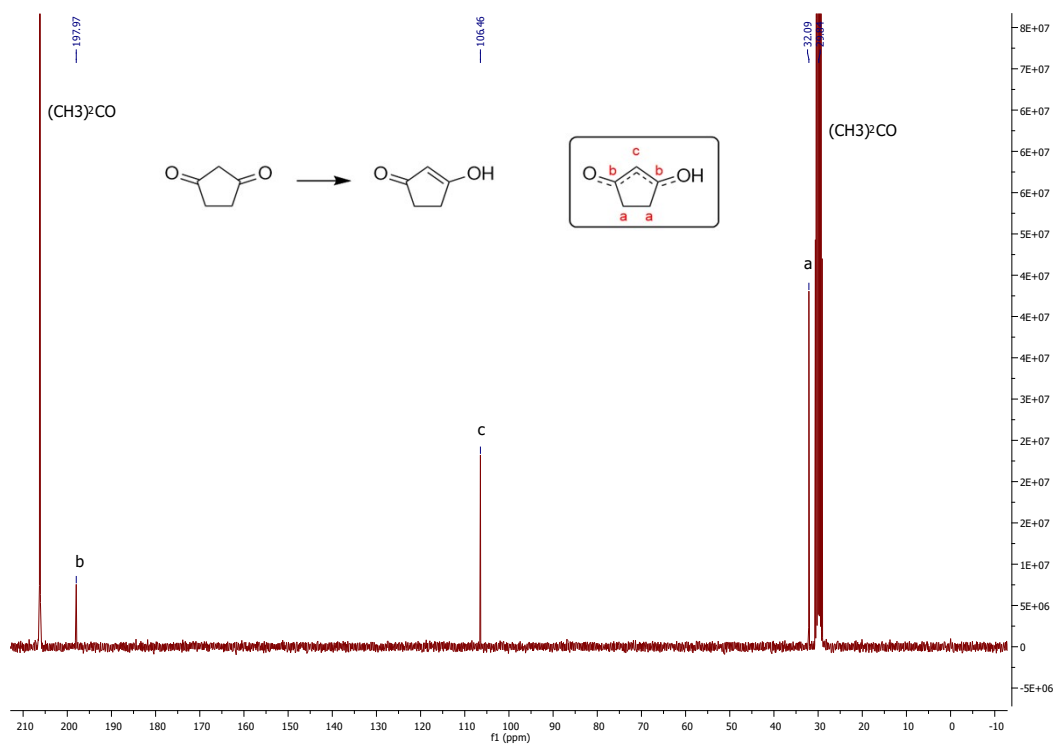

Figure S2.1.4:  $^{13}\text{C-NMR}$  spectrum of CPDO in acetone- $d_6$ .

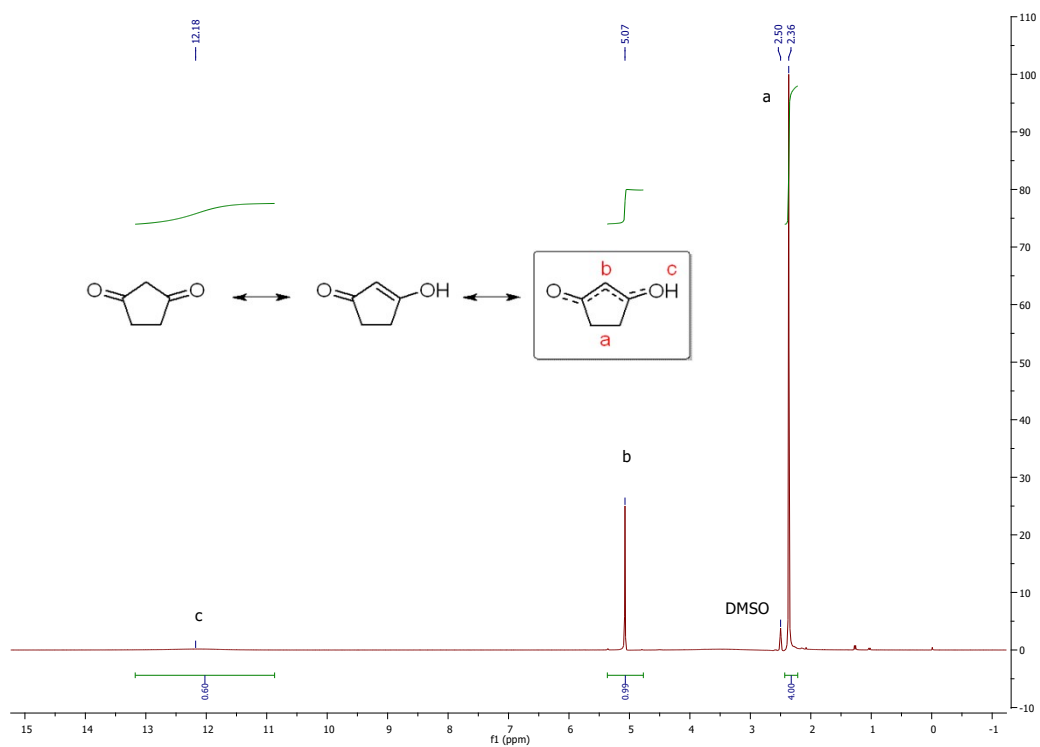

Figure S2.1.5:  $^1\text{H-NMR}$  spectrum of CPDO in  $\text{DMSO-d}_6$ .

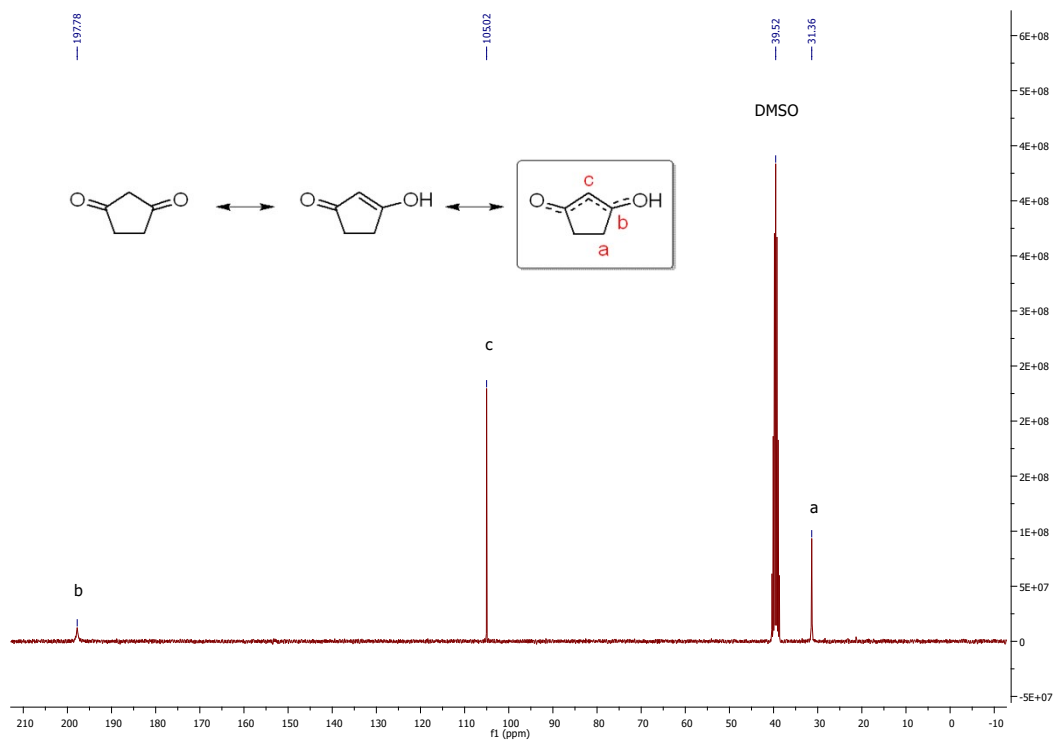

Figure S2.1.6:  $^{13}\text{C-NMR}$  spectrum of CPDO in  $\text{DMSO-d}_6$ .



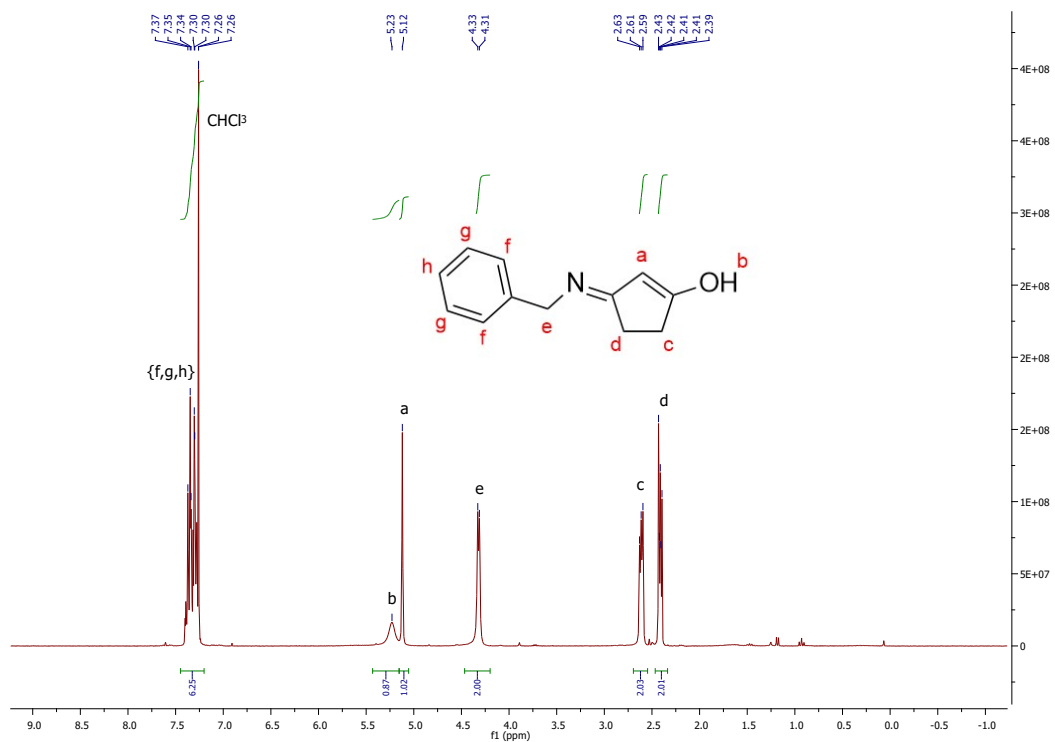

Figure 2.1.7:  $^1\text{H-NMR}$  spectrum of compound **1** in  $\text{CDCl}_3$ .

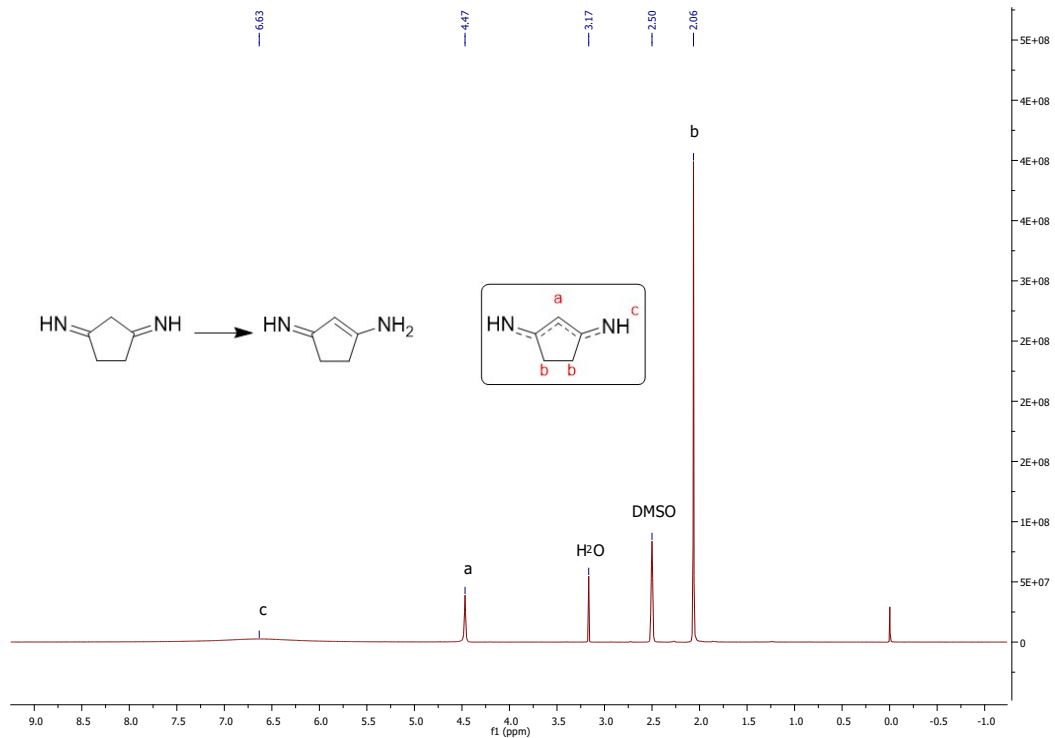

Figure S2.1.8:  $^1\text{H-NMR}$  spectrum of CPDI in  $\text{DMSO-d}_6$ .

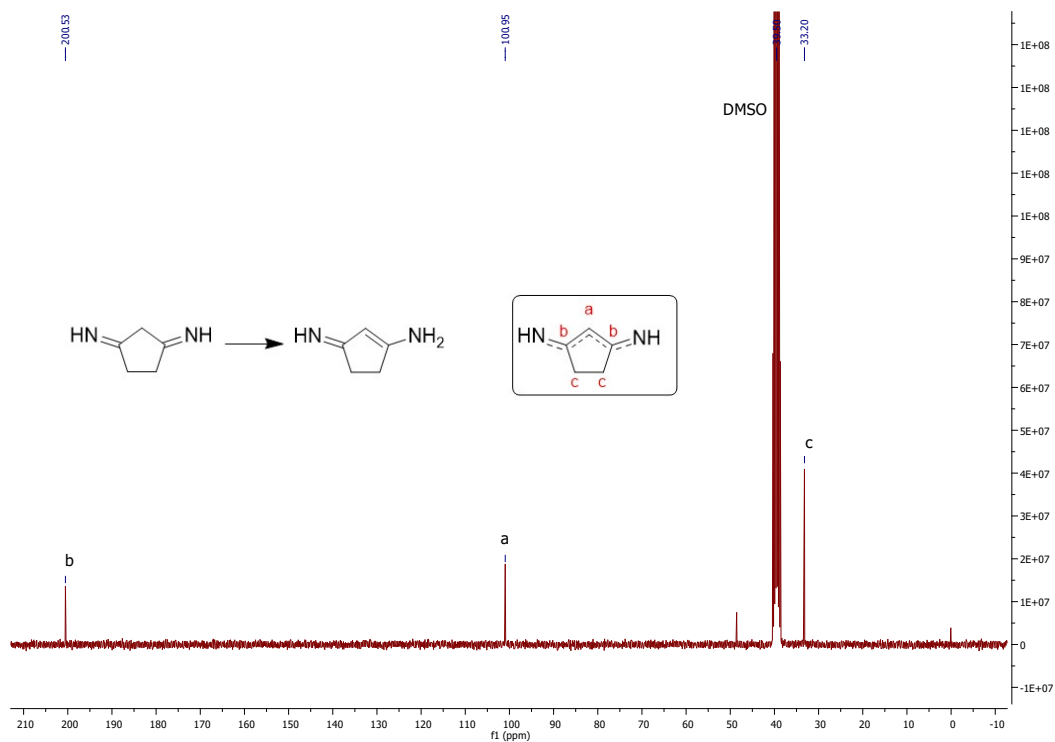

Figure S2.1.9:  $^{13}\text{C-NMR}$  spectrum of CPDI in  $\text{DMSO-d}_6$ .

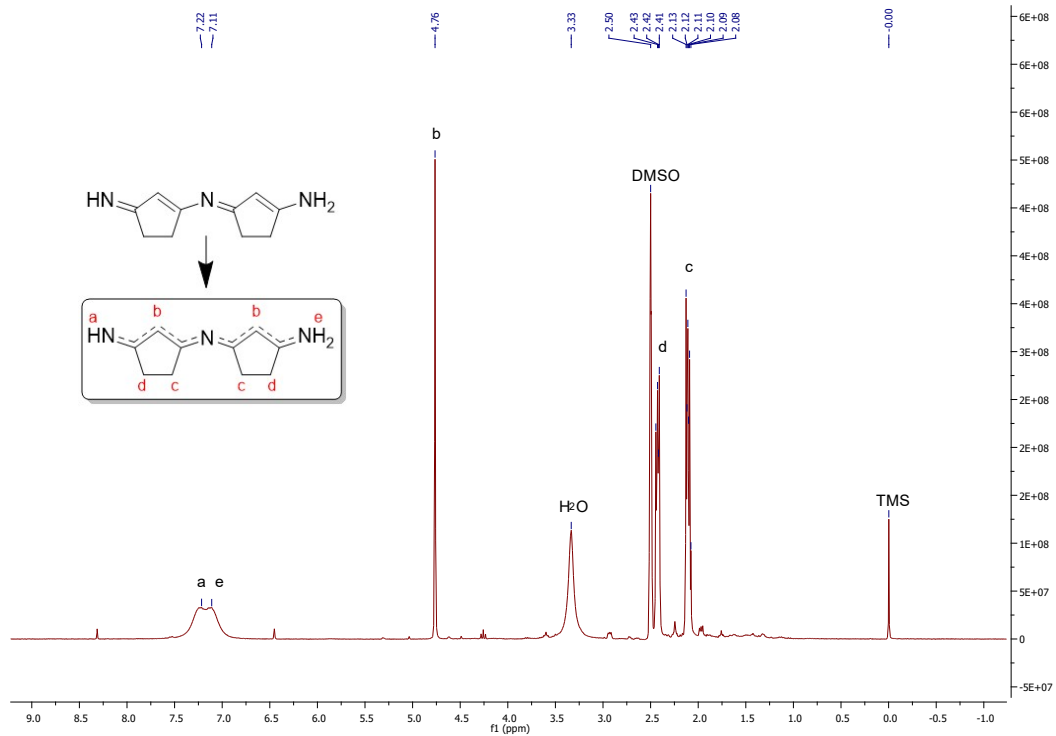

Figure 2.1.10:  $^1\text{H-NMR}$  spectrum of compound **2** in  $\text{DMSO-}d_6$ .

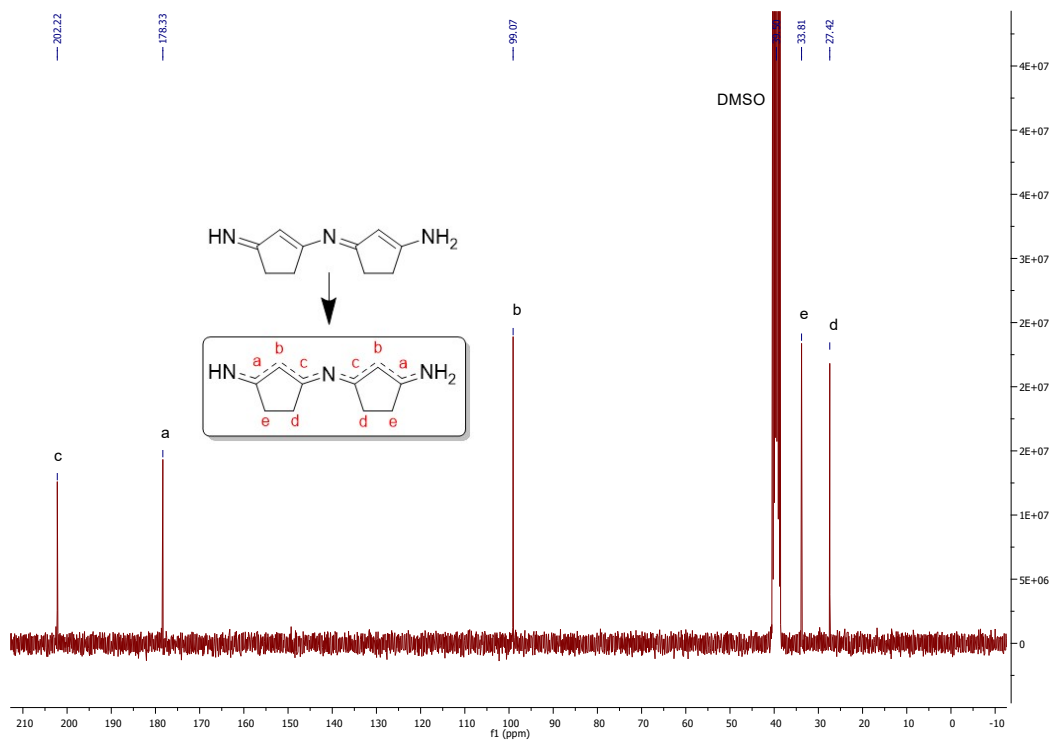

Figure 2.1.11:  $^{13}\text{C-NMR}$  spectrum of compound **2** in  $\text{DMSO-}d_6$ .

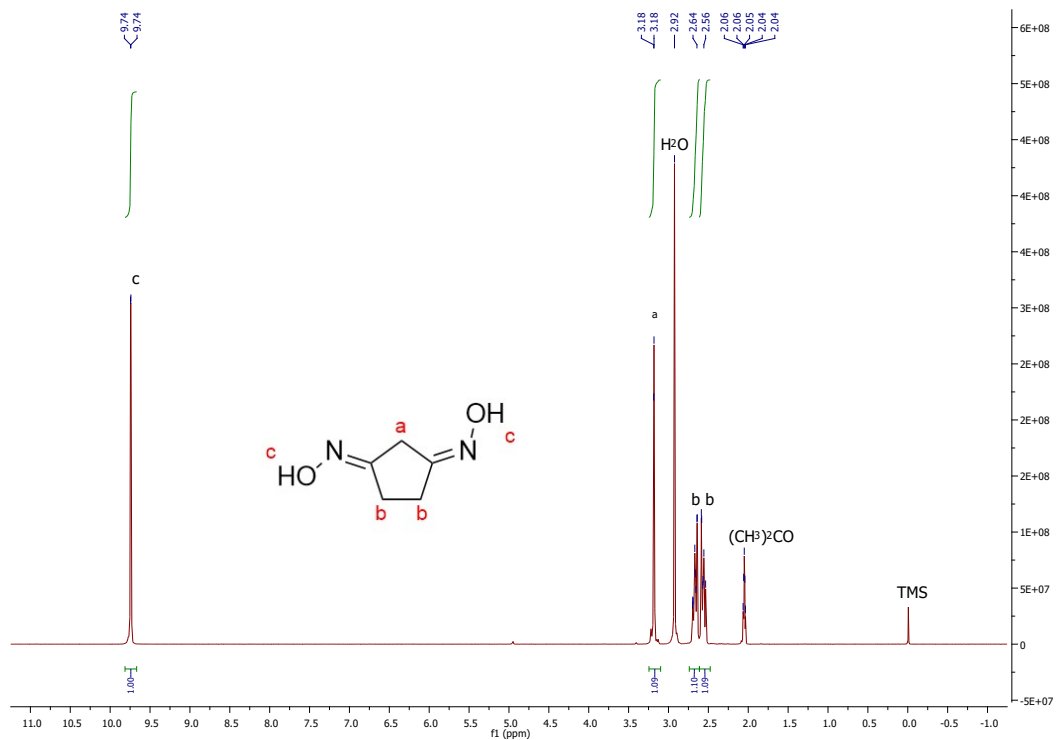

Figure S2.1.12:  $^1\text{H-NMR}$  spectrum of CPDX in acetone- $d_6$ .

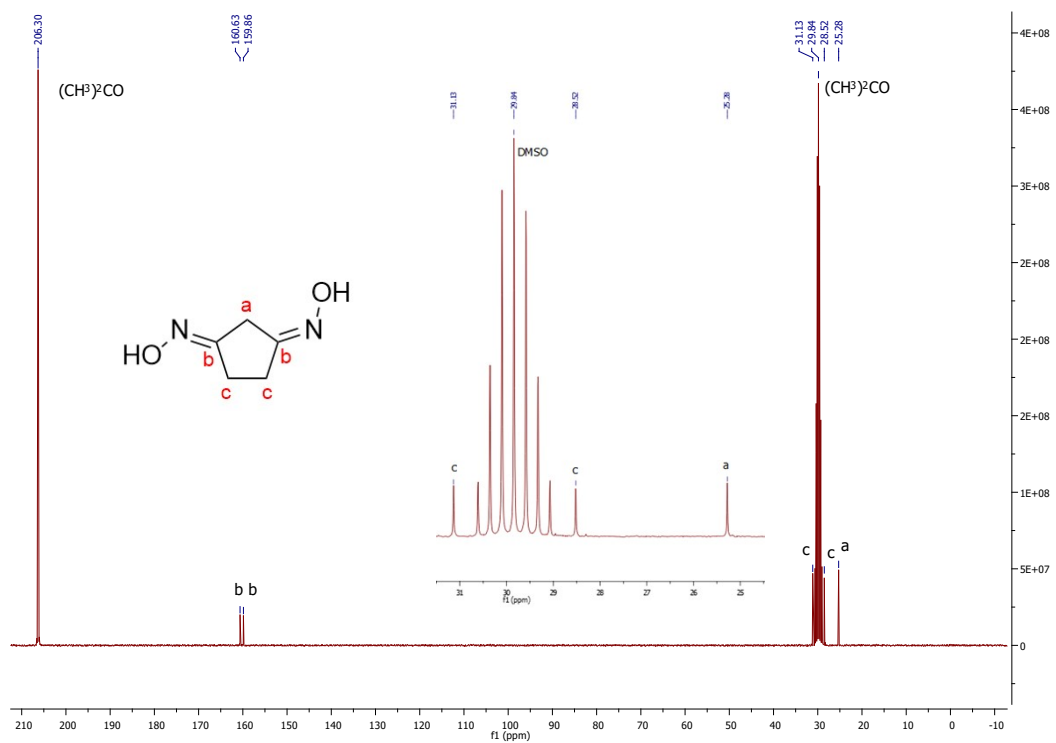

Figure S2.1.13:  $^{13}\text{C-NMR}$  spectrum of CPDX in acetone- $d_6$ .

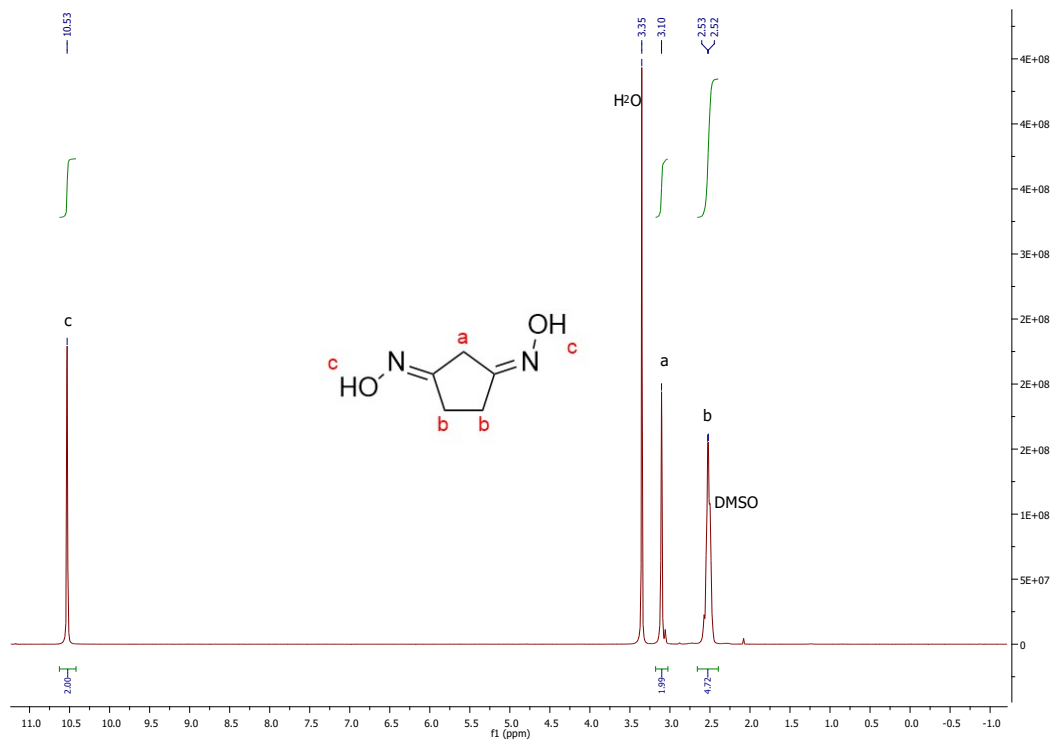

Figure S2.1.14: <sup>1</sup>H-NMR spectrum of CPDX in DMSO-d<sub>6</sub>.

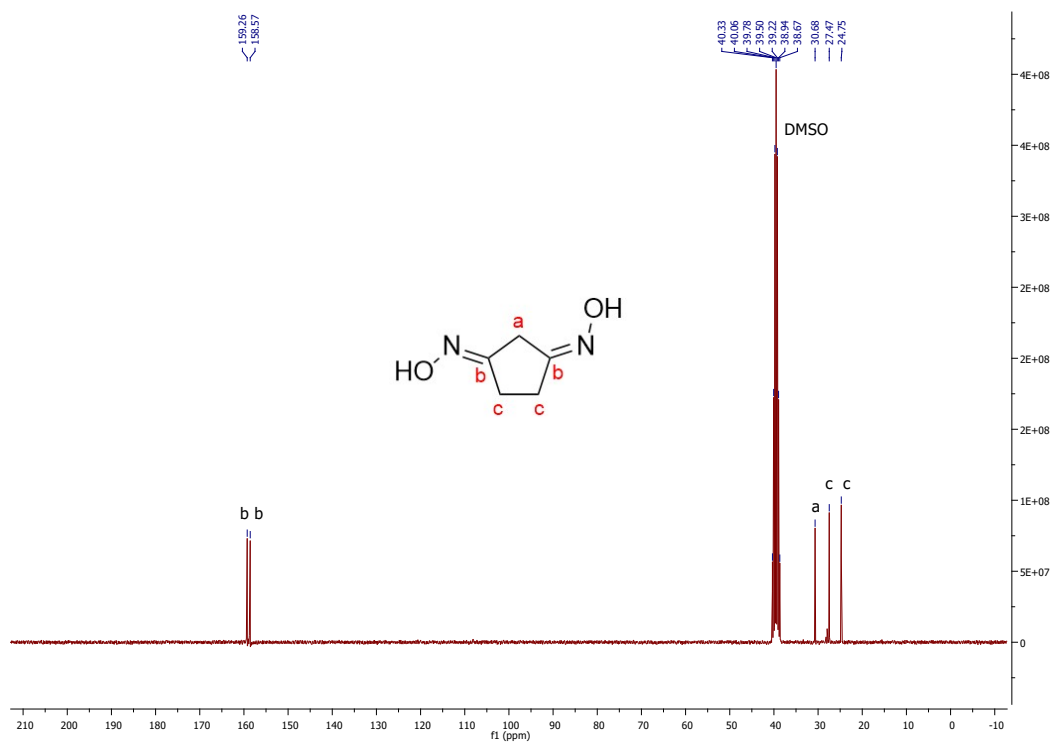

Figure S2.1.15: <sup>13</sup>C-NMR spectrum of CPDX in DMSO-d<sub>6</sub>.

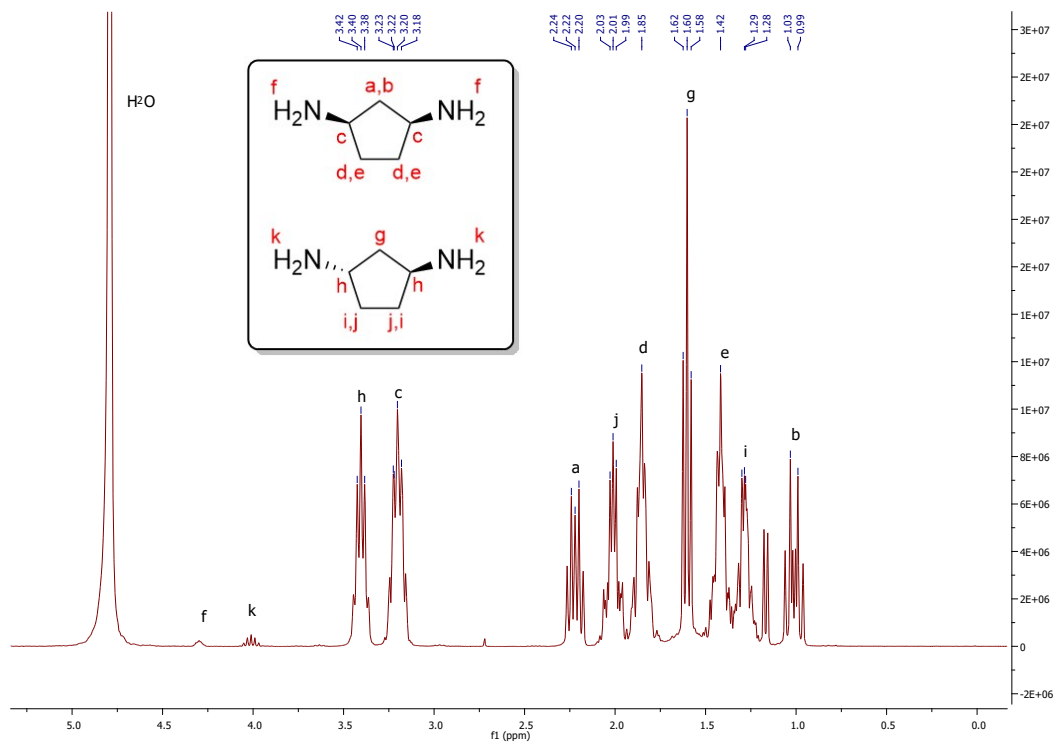

Figure S2.1.16:  $^1\text{H}$ -NMR spectrum of CPDA (obtained from preparative hydrogenation) in  $\text{D}_2\text{O}$ .

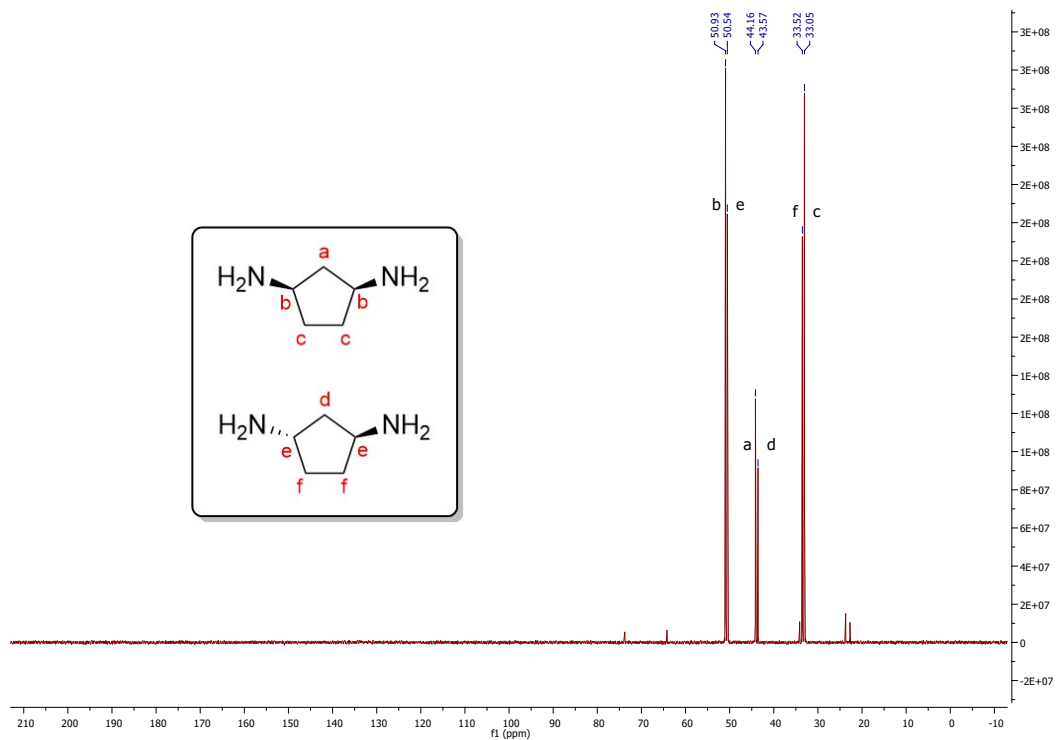

Figure S2.1.17:  $^{13}\text{C}$ -NMR spectrum of CPDA (obtained from preparative hydrogenation) in  $\text{D}_2\text{O}$ .

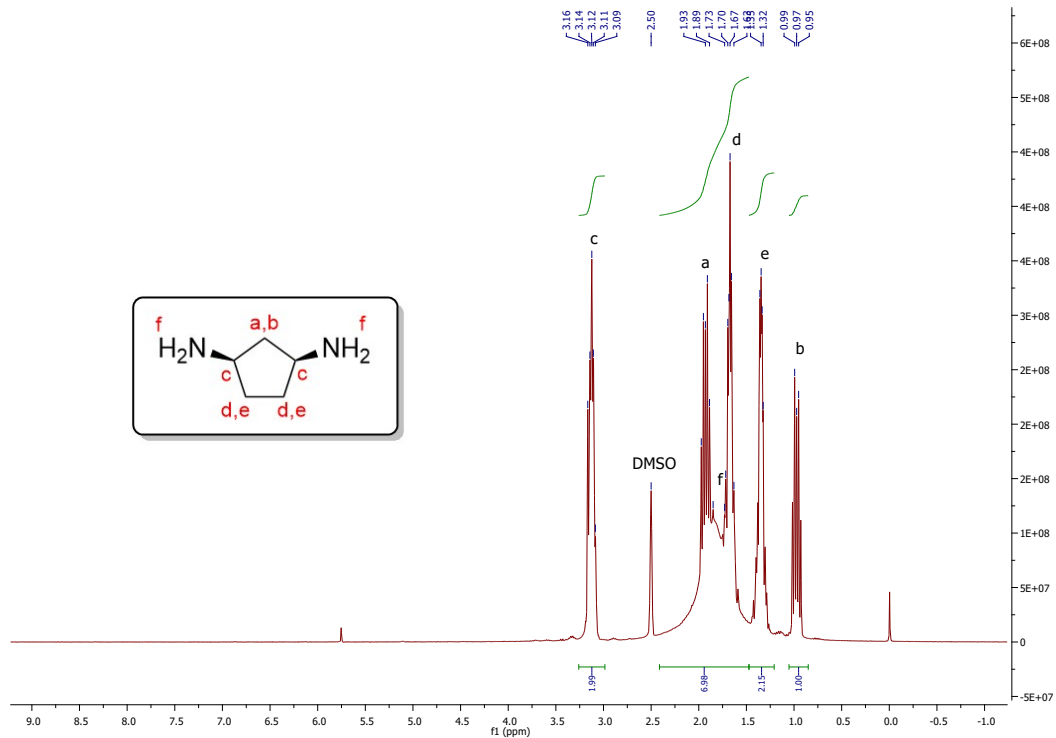

Figure S2.1.18: <sup>1</sup>H-NMR spectrum of cis-CPDA (obtained from Matrix Chemicals) in DMSO-d<sub>6</sub>.

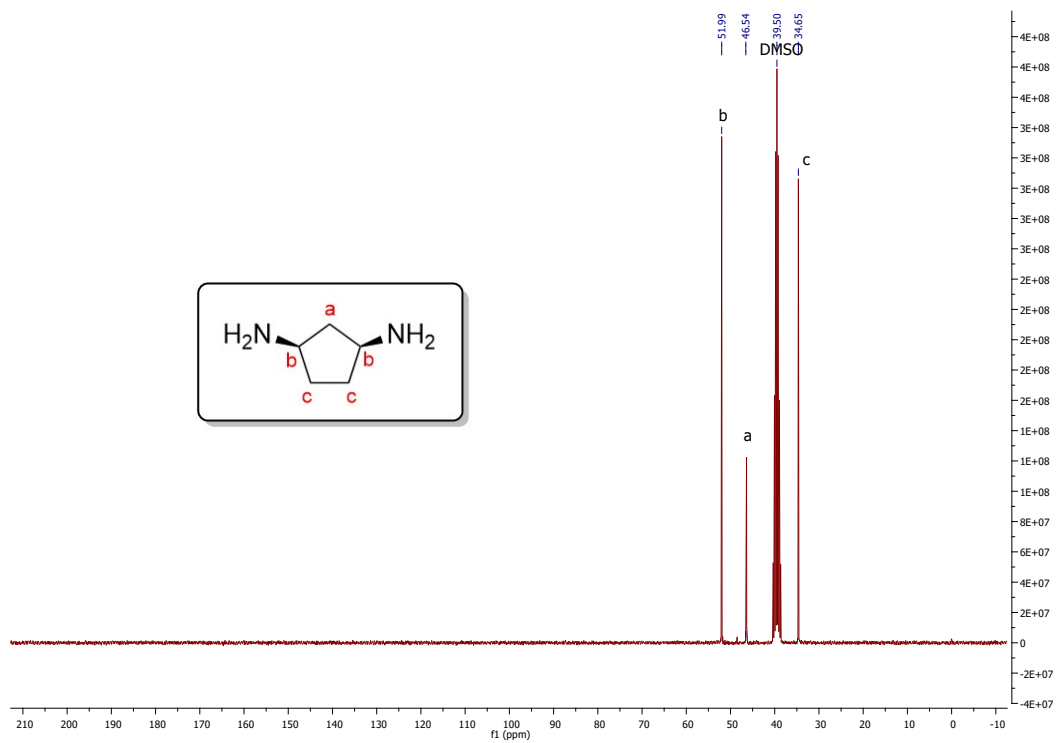

Figure S2.1.19: <sup>13</sup>C-NMR spectrum of cis-CPDA (obtained from Matrix Chemicals) in DMSO-d<sub>6</sub>.

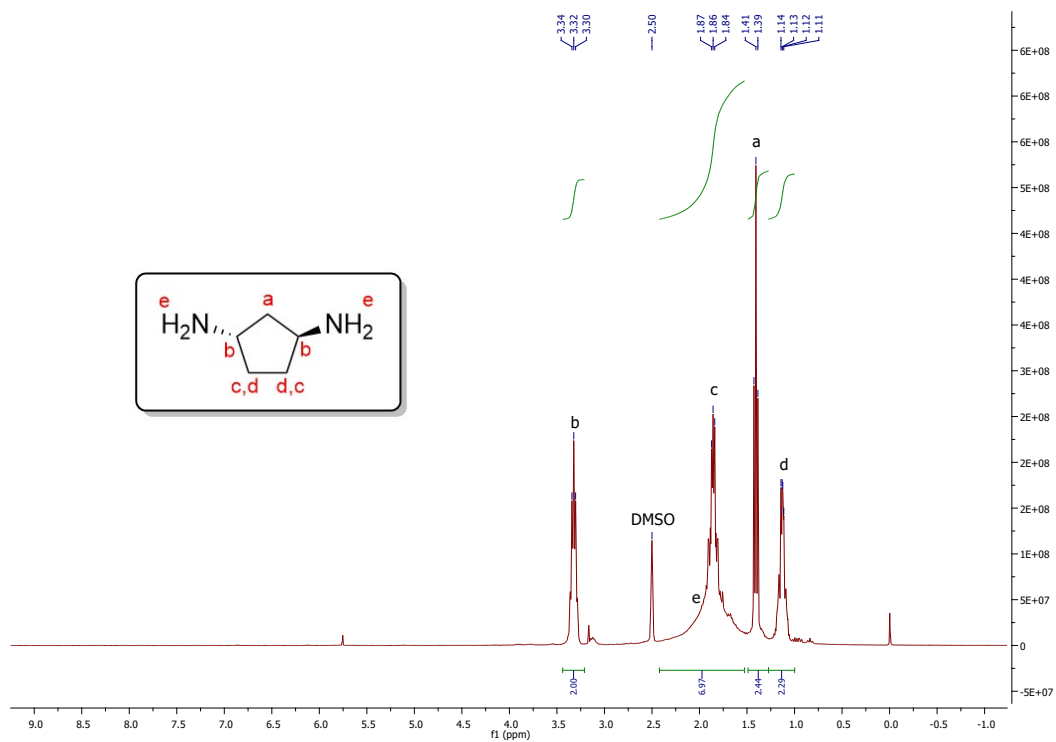

Figure S2.1.20:  $^1\text{H-NMR}$  spectrum of *trans*-CPDA (obtained from Matrix Chemicals) in DMSO- $d_6$ .

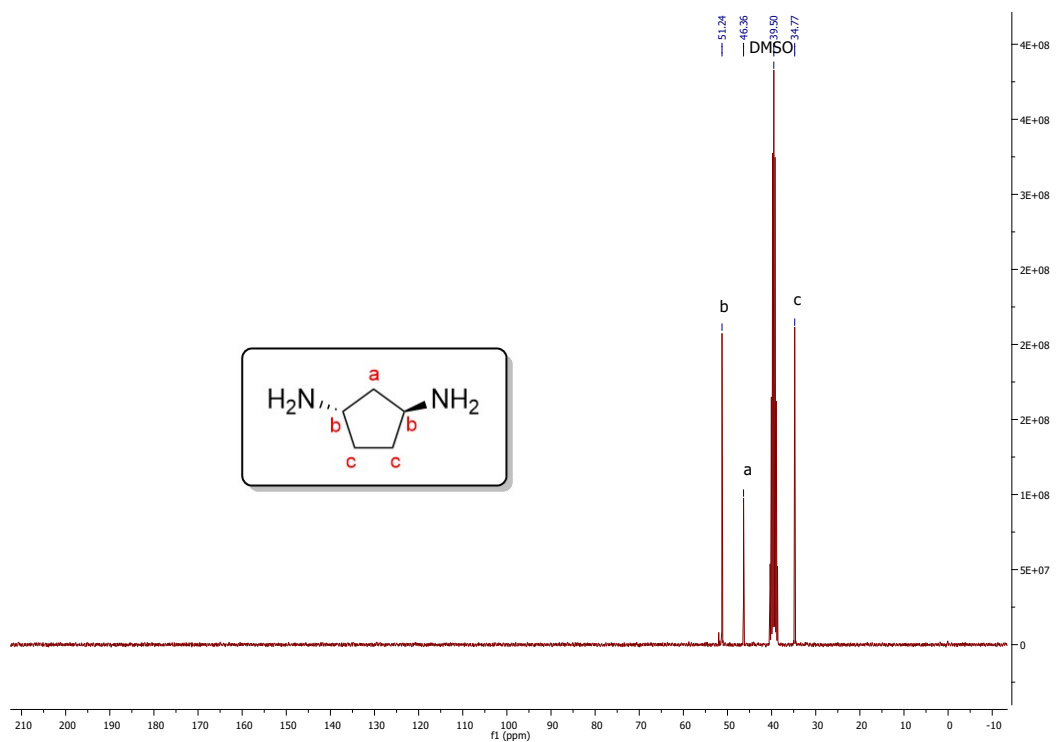

Figure S2.1.21:  $^1\text{H-NMR}$  spectrum of *trans*-CPDA (obtained from Matrix Chemicals) in DMSO- $d_6$ .



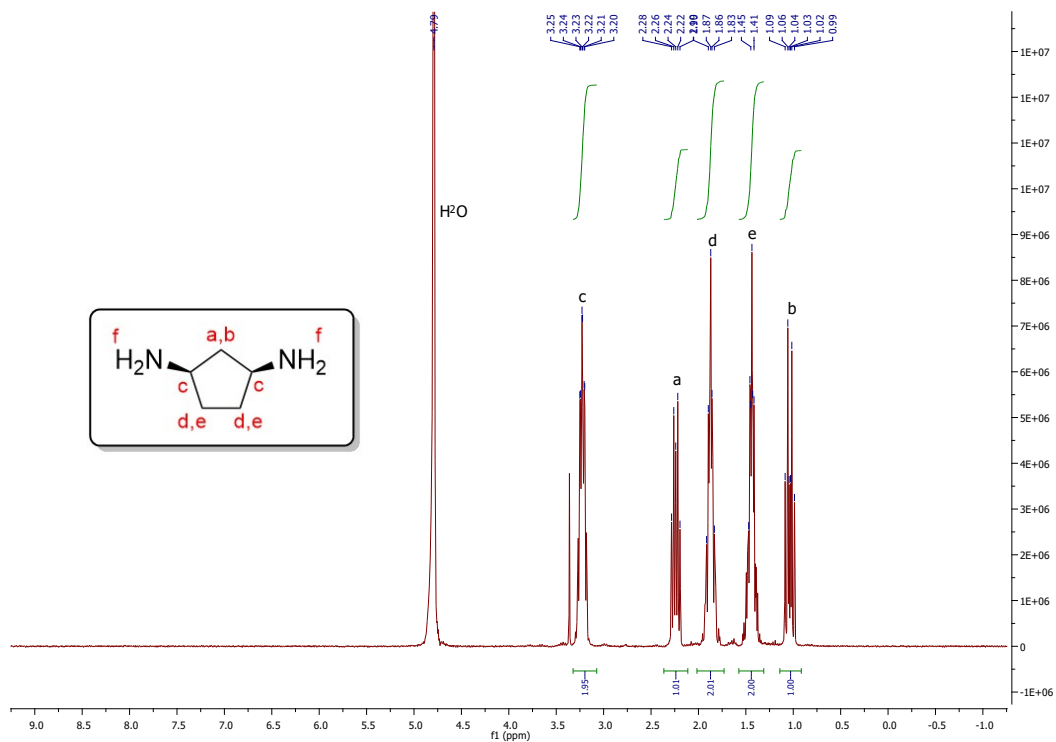

Figure S2.1.22:  $^1\text{H-NMR}$  spectrum of *cis-CPDA* (obtained from Matrix Chemicals) in  $\text{D}_2\text{O}$ .

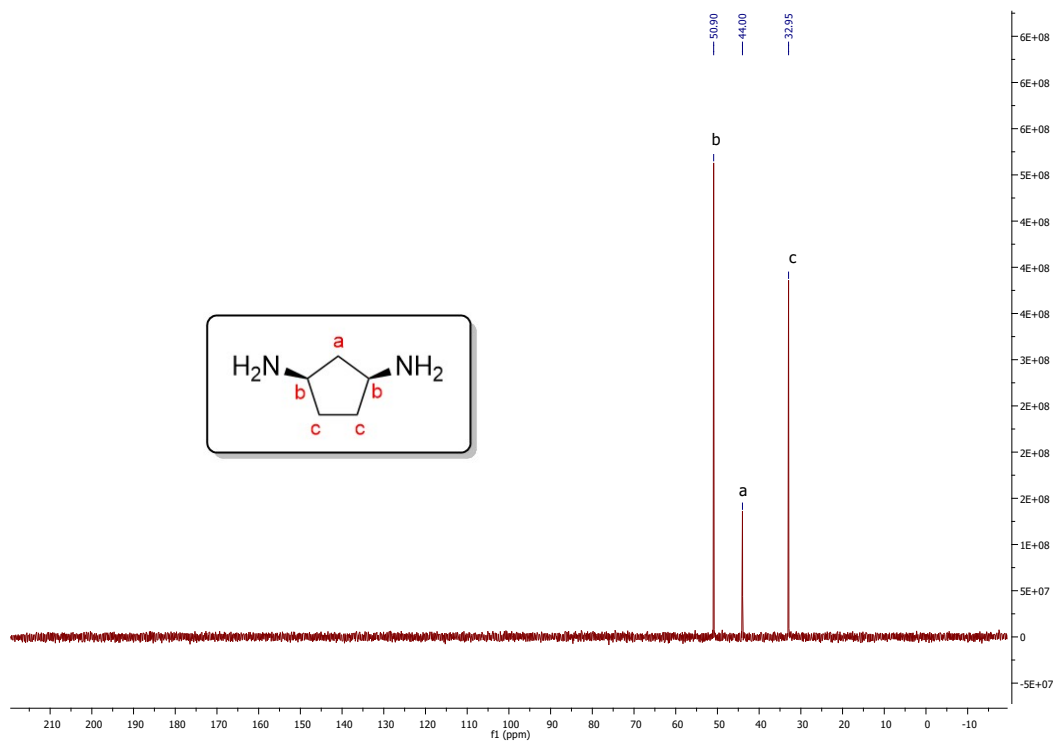

Figure S2.1.23:  $^{13}\text{C-NMR}$  spectrum of *cis-CPDA* (obtained from Matrix Chemicals) in  $\text{D}_2\text{O}$ .

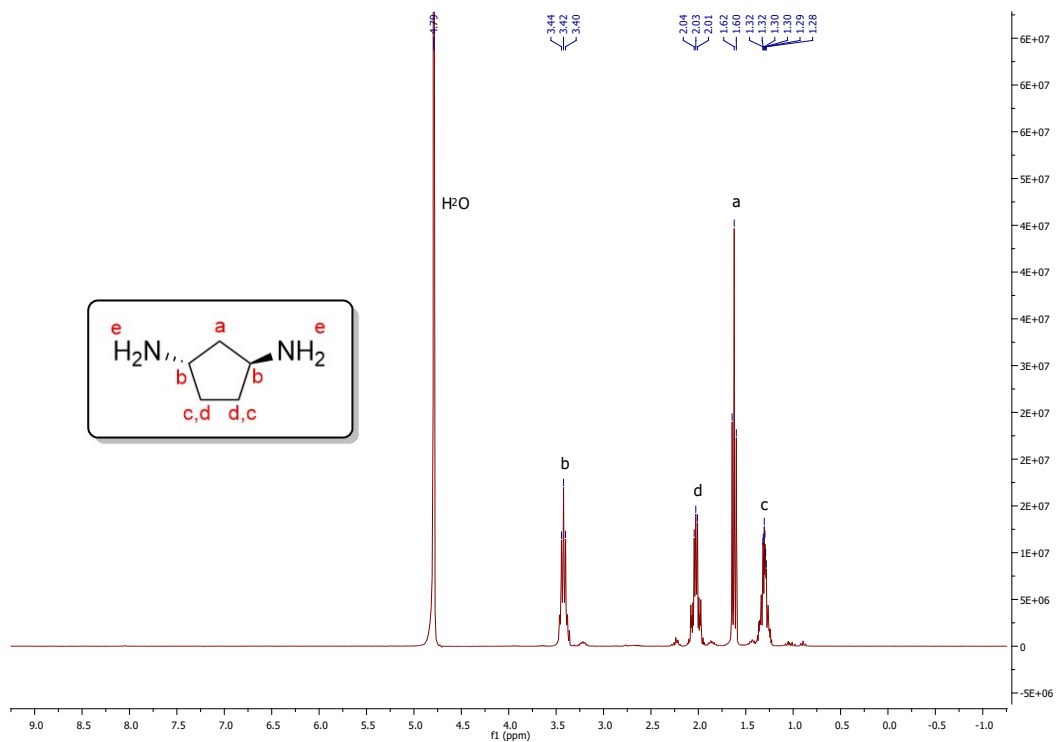

Figure S2.1.24:  $^1\text{H-NMR}$  spectrum of *trans*-CPDA (obtained from Matrix Chemicals) in  $\text{D}_2\text{O}$ .

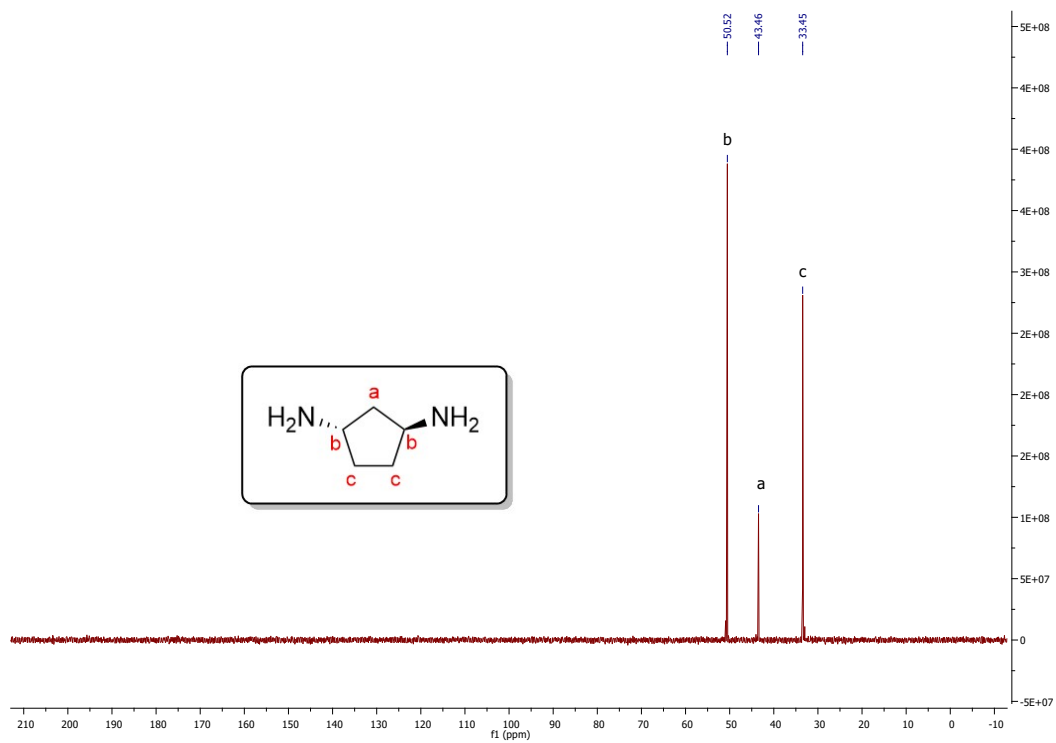

Figure S2.1.25:  $^{13}\text{C-NMR}$  spectrum of *trans*-CPDA (obtained from Matrix Chemicals) in  $\text{D}_2\text{O}$ .

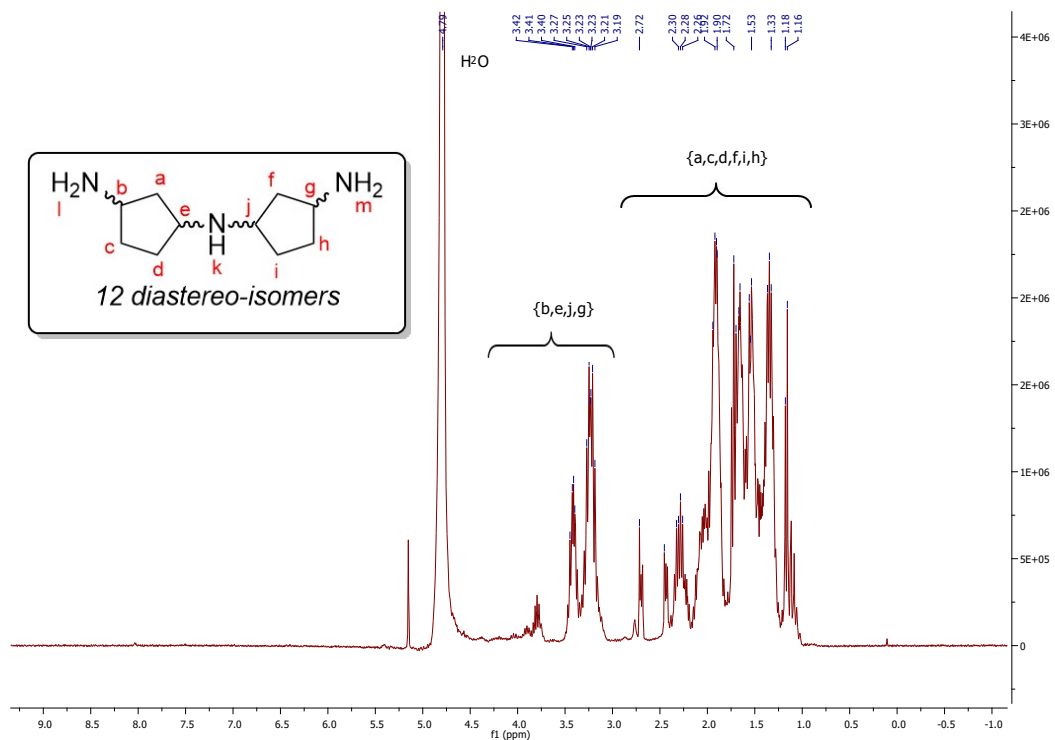

Figure S2.1.26:  $^1\text{H-NMR}$  spectrum of CPDA-dimer (obtained from preparative hydrogenation) in  $\text{D}_2\text{O}$ .

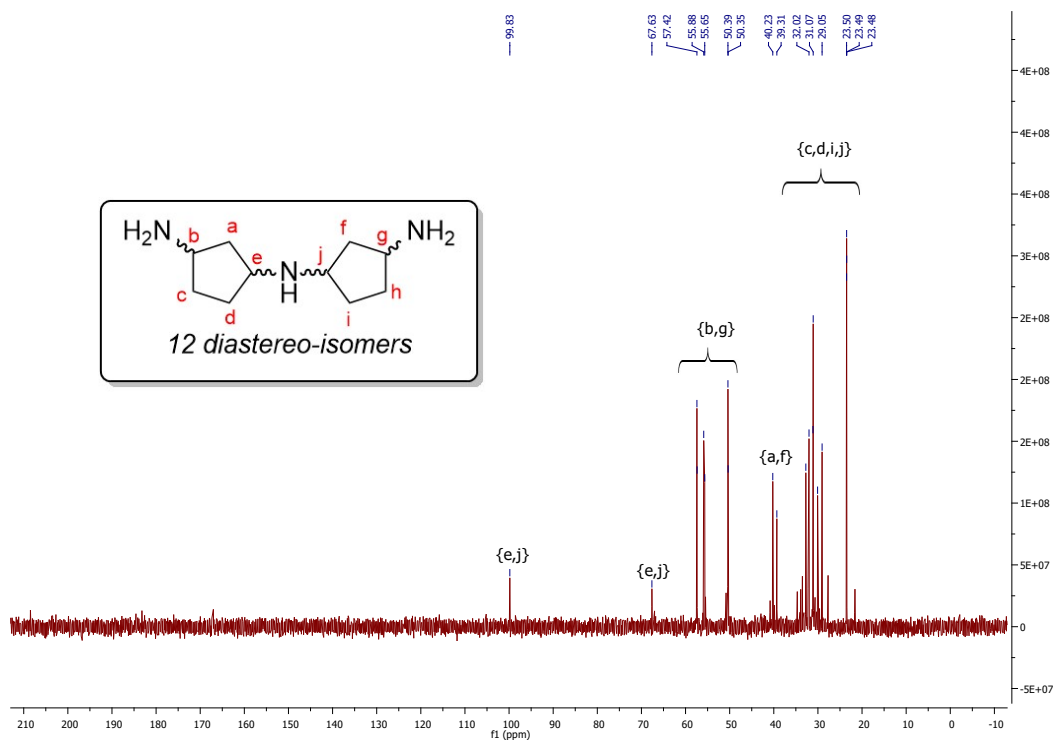

Figure S2.1.27:  $^{13}\text{C-NMR}$  spectrum of CPDA-dimer (obtained from preparative hydrogenation) in  $\text{D}_2\text{O}$ .

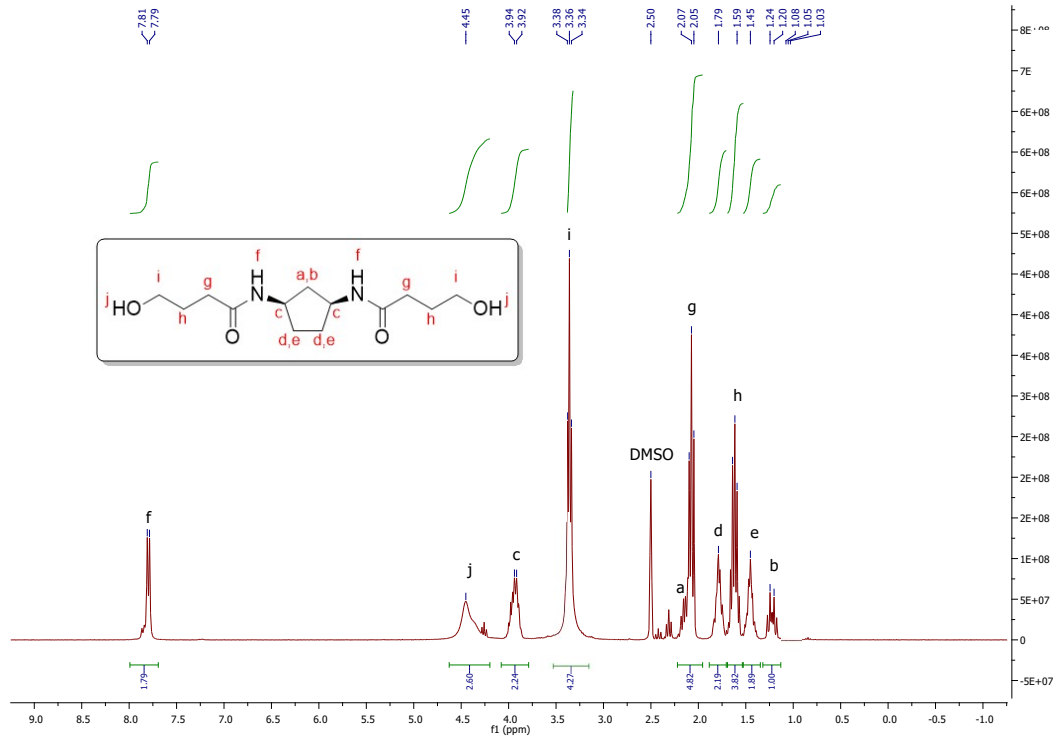

Figure S2.1.28: <sup>1</sup>H-NMR spectrum of **3** in DMSO-d<sub>6</sub>.

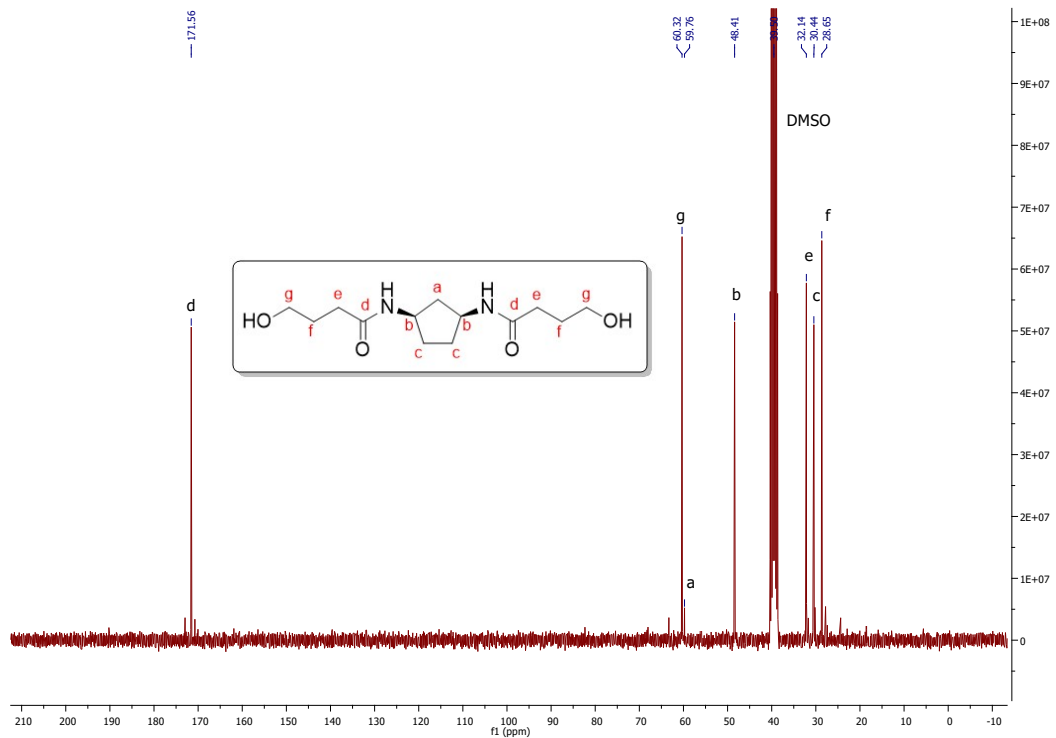

Figure S2.1.29: <sup>13</sup>C-NMR spectrum of **3** in DMSO-d<sub>6</sub>.

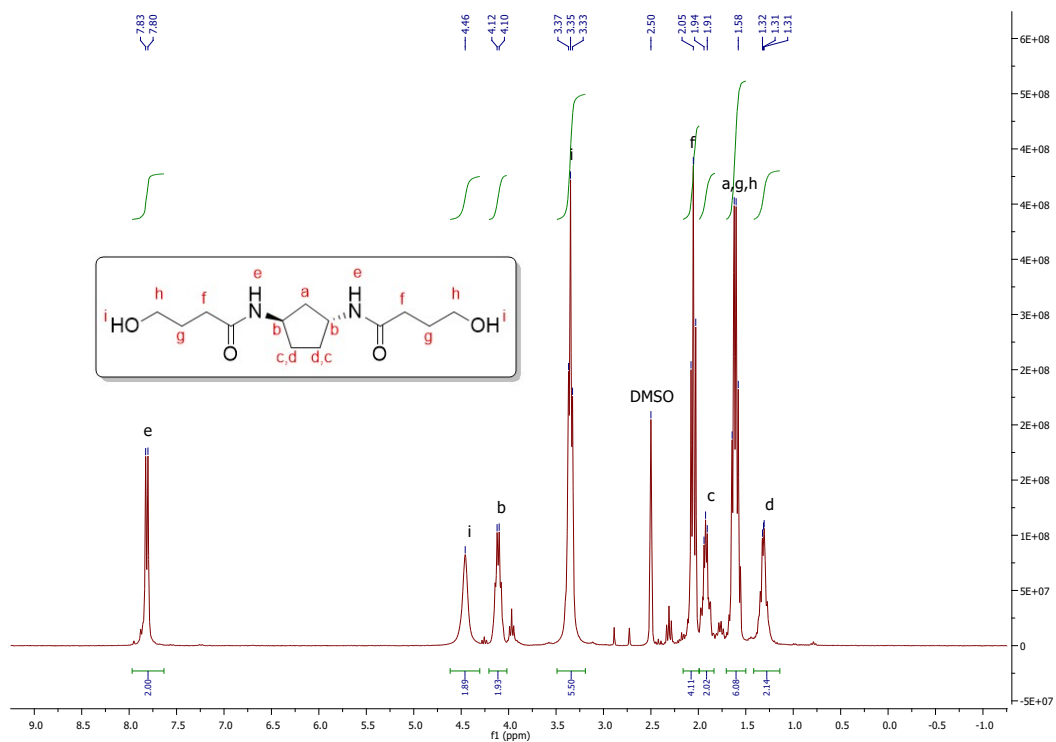

Figure S2.1.30:  $^1\text{H-NMR}$  spectrum of 4 in  $\text{DMSO-d}_6$ .

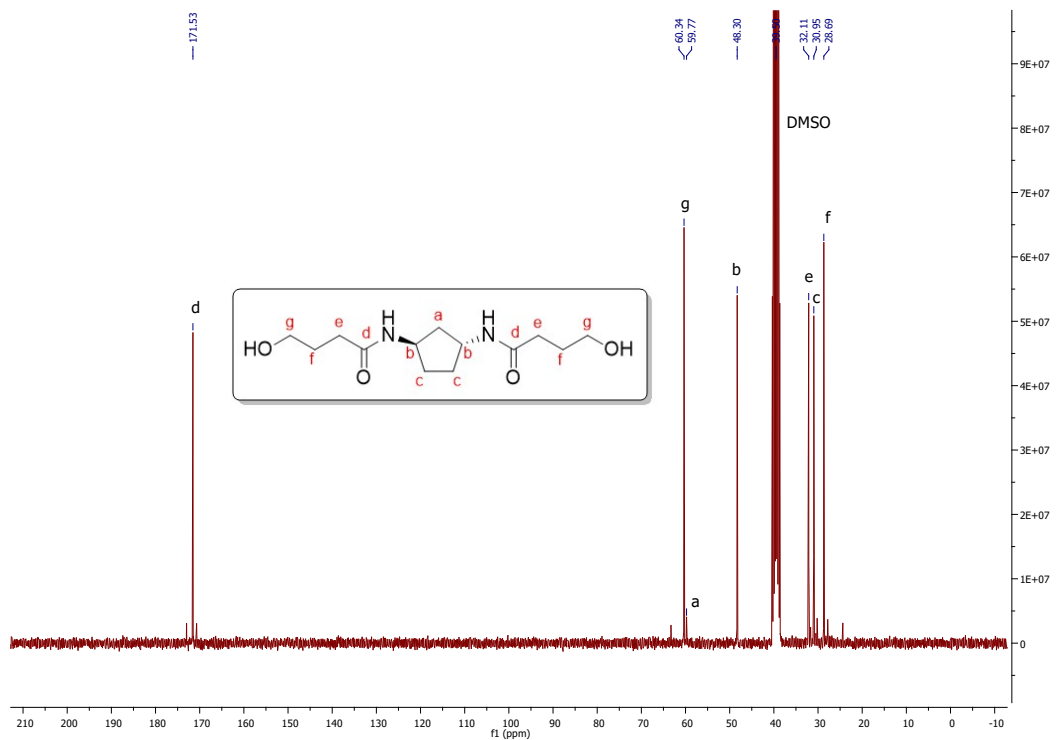

Figure S2.1.31:  $^{13}\text{C-NMR}$  spectrum of 4 in  $\text{DMSO-d}_6$ .

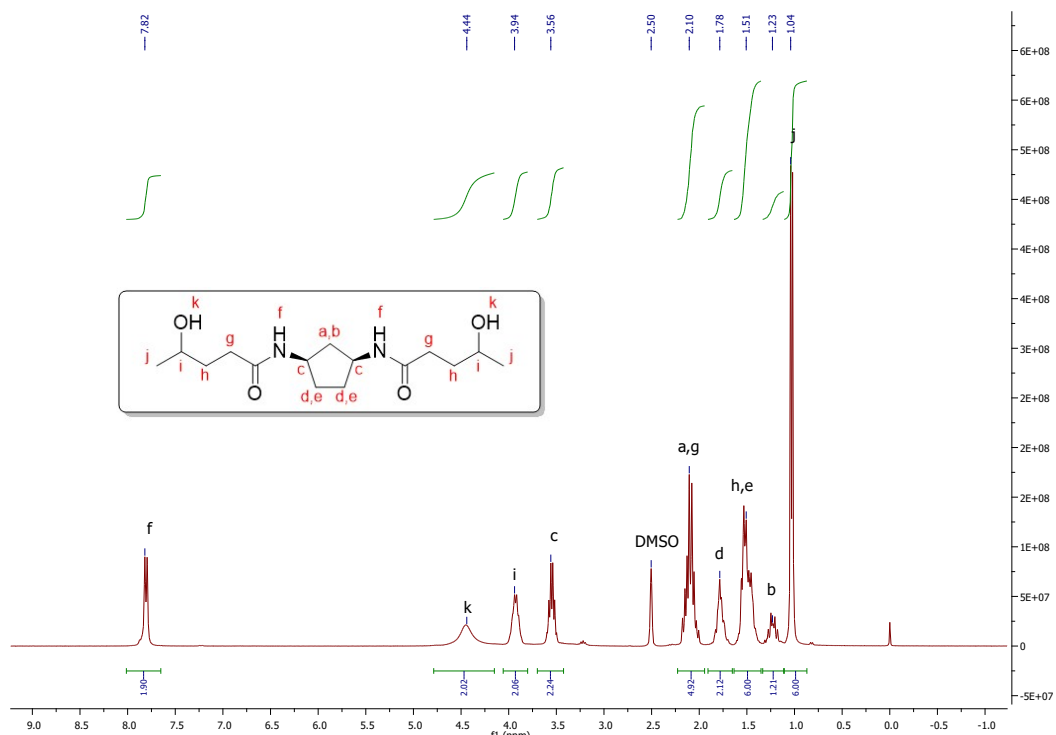

Figure S2.1.32:  $^1\text{H}$ -NMR spectrum of 5 in  $\text{DMSO}-d_6$ .

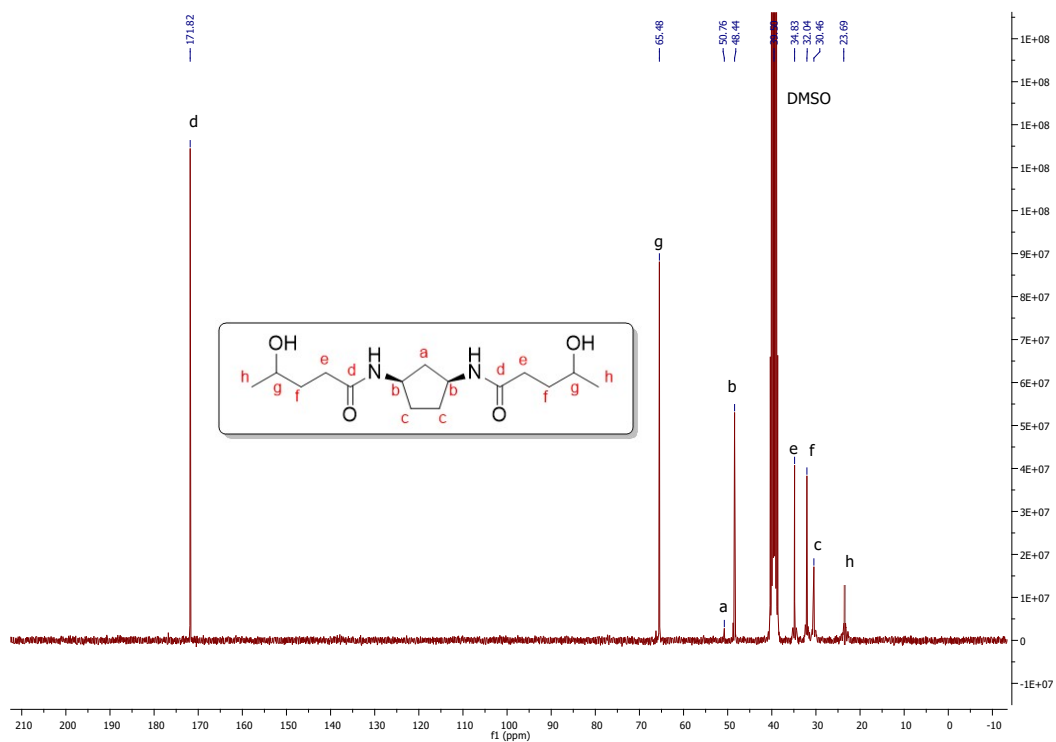

Figure S2.1.33:  $^{13}\text{C}$ -NMR spectrum of 5 in  $\text{DMSO}-d_6$ .

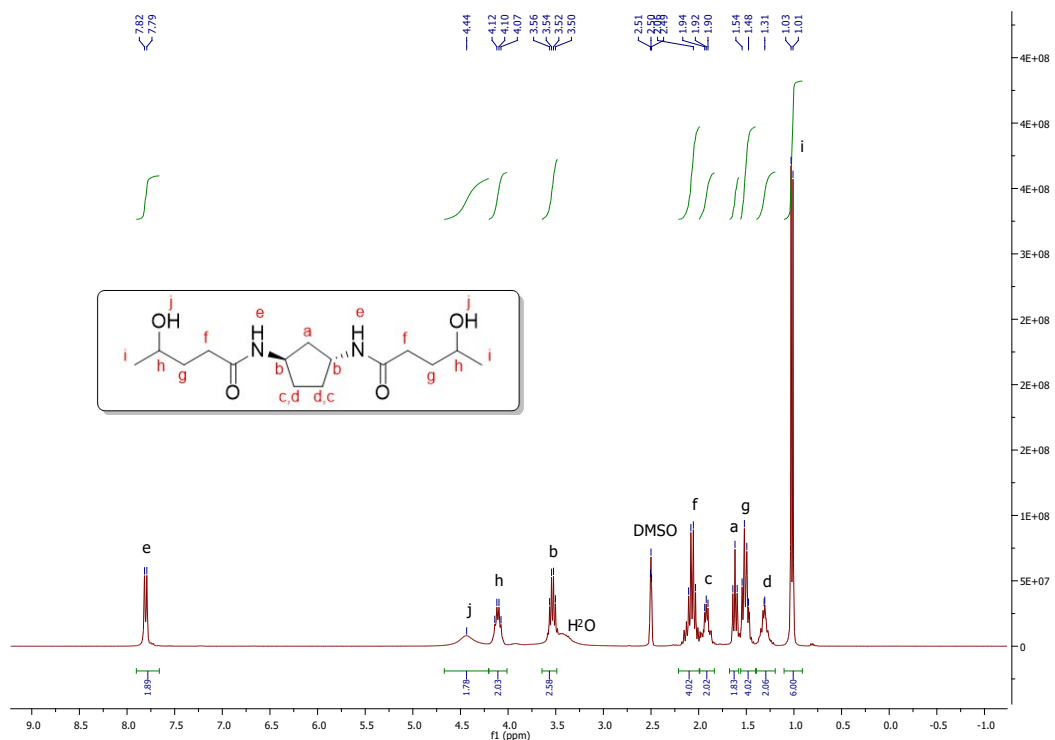

Figure S2.1.34:  $^1\text{H}$ -NMR spectrum of **6** in  $\text{DMSO-}d_6$ .

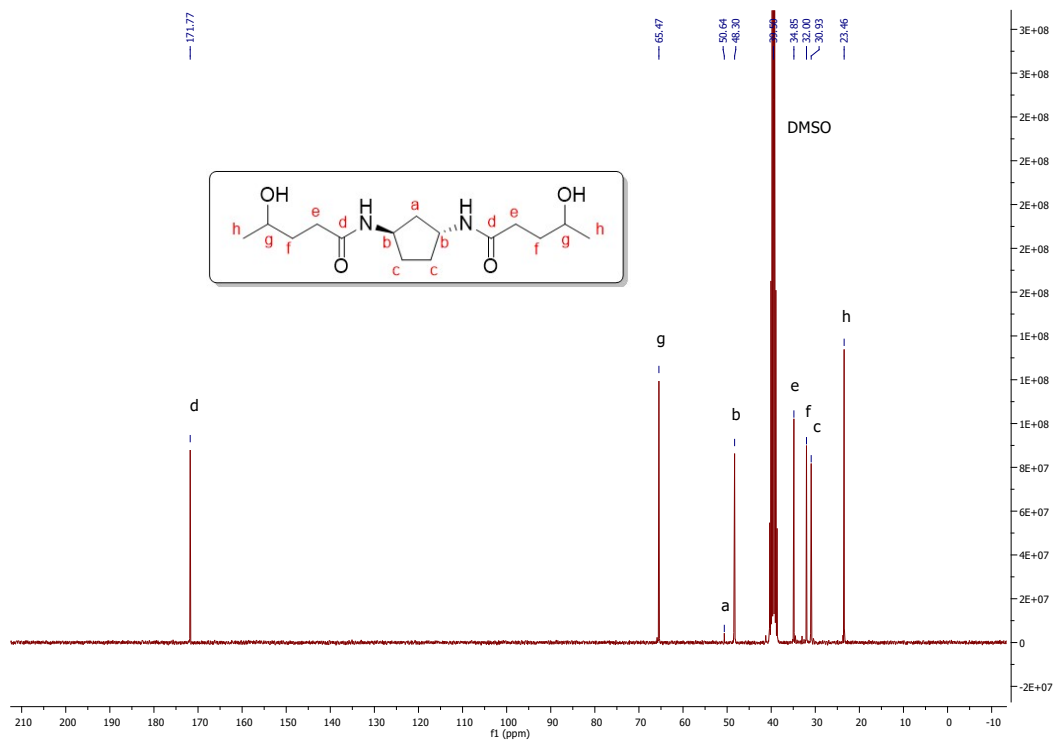

Figure S2.1.35:  $^{13}\text{C}$ -NMR spectrum of **6** in  $\text{DMSO-}d_6$ .

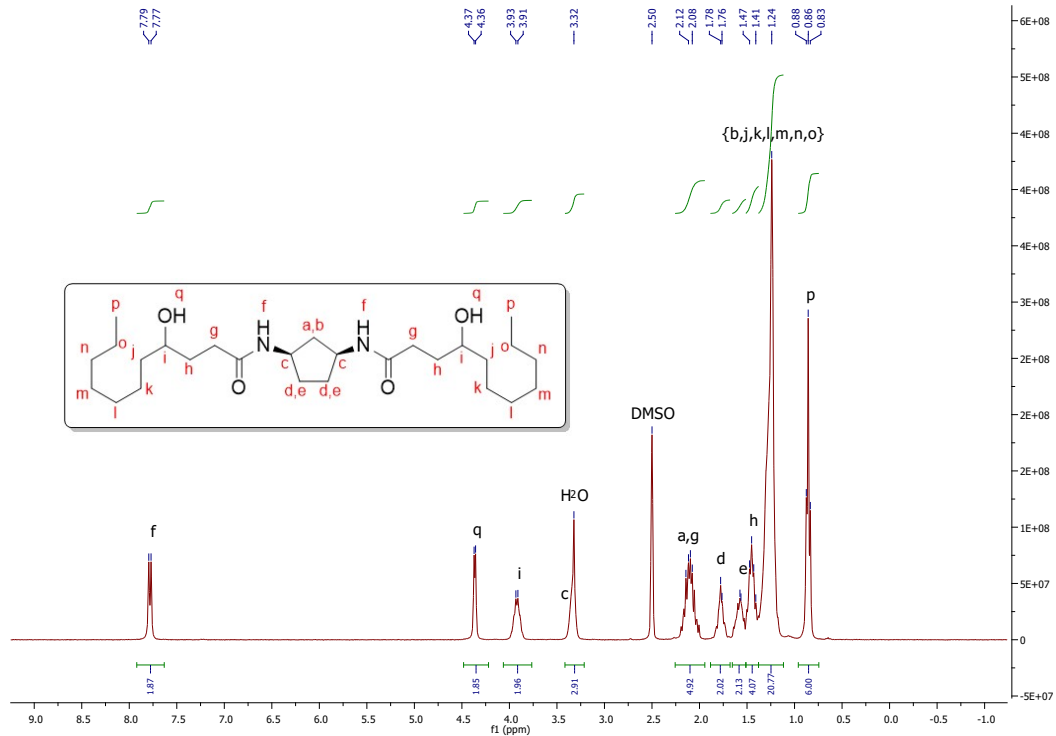

Figure S2.1.36:  $^1\text{H-NMR}$  spectrum of 7 in  $\text{DMSO-}d_6$ .

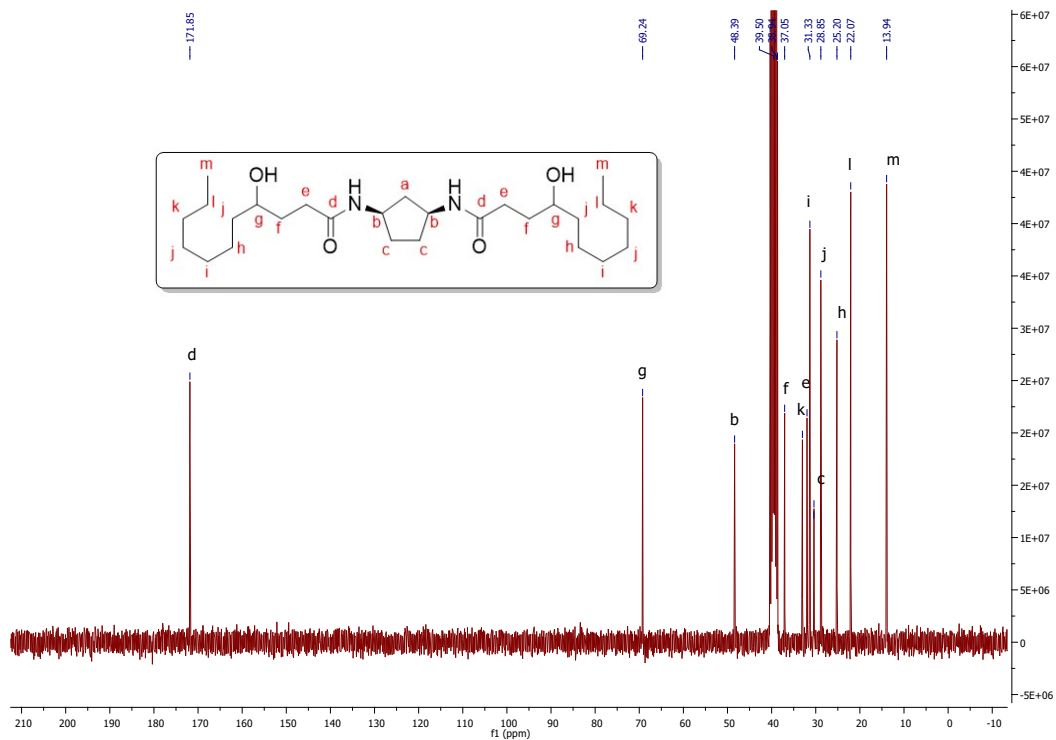

Figure S2.1.37:  $^{13}\text{C-NMR}$  spectrum of 7 in  $\text{DMSO-}d_6$ .



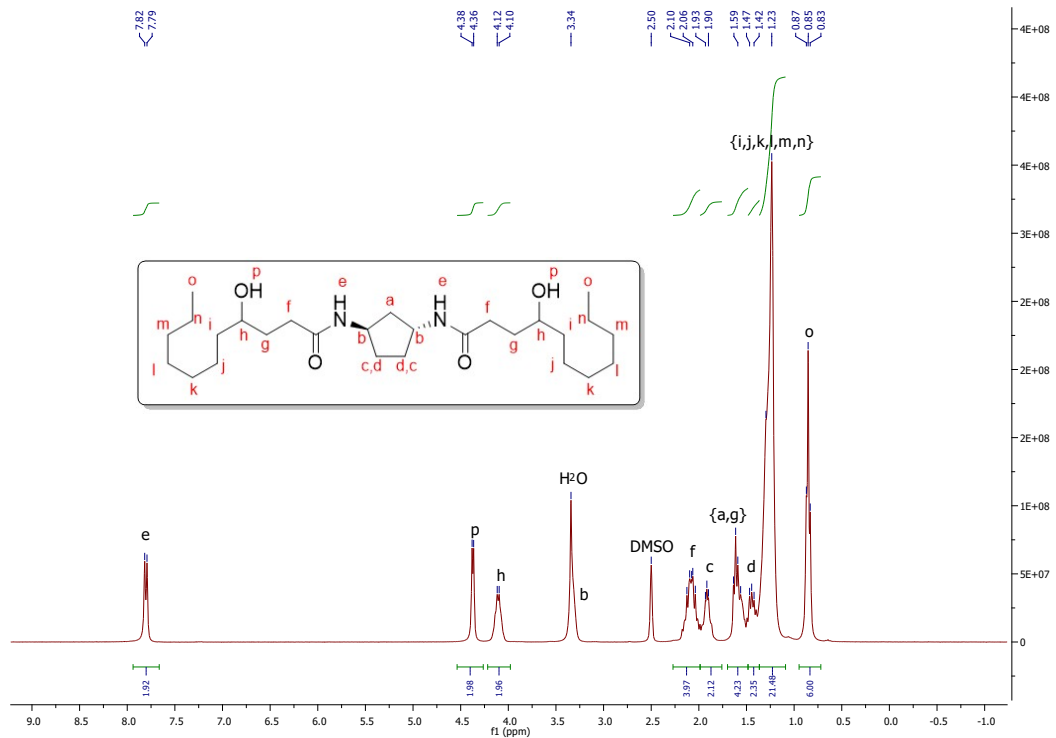

Figure S2.1.38:  $^1\text{H-NMR}$  spectrum of **8** in  $\text{DMSO-}d_6$ .

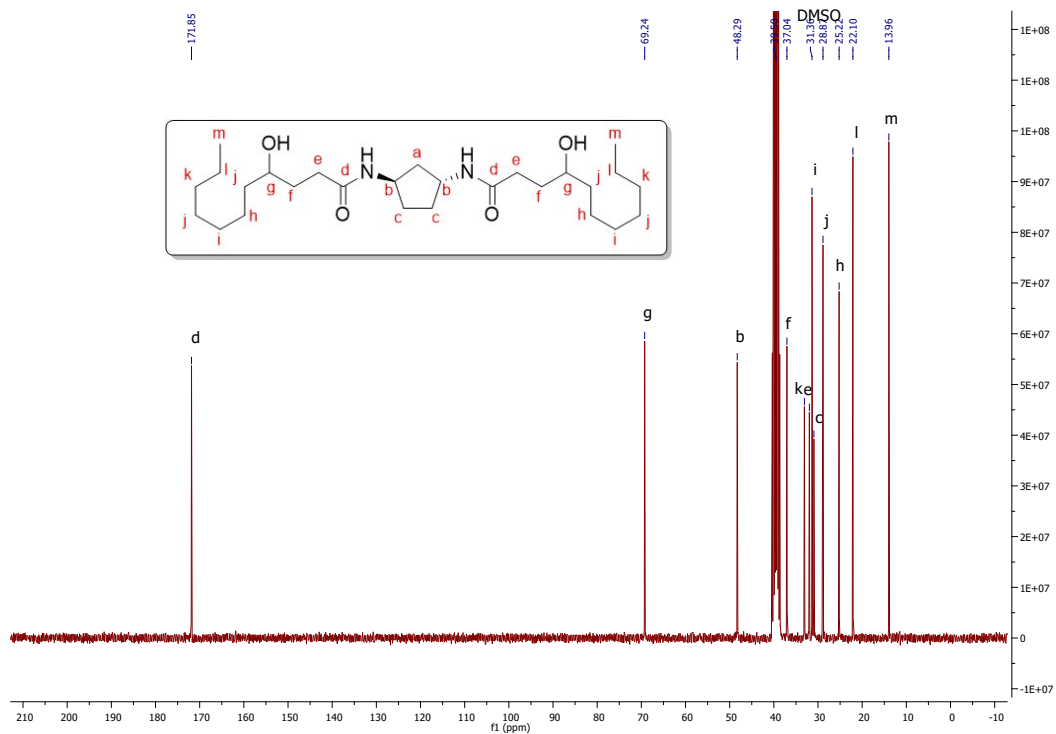

Figure S2.1.39:  $^{13}\text{C-NMR}$  spectrum of **8** in  $\text{DMSO-}d_6$ .

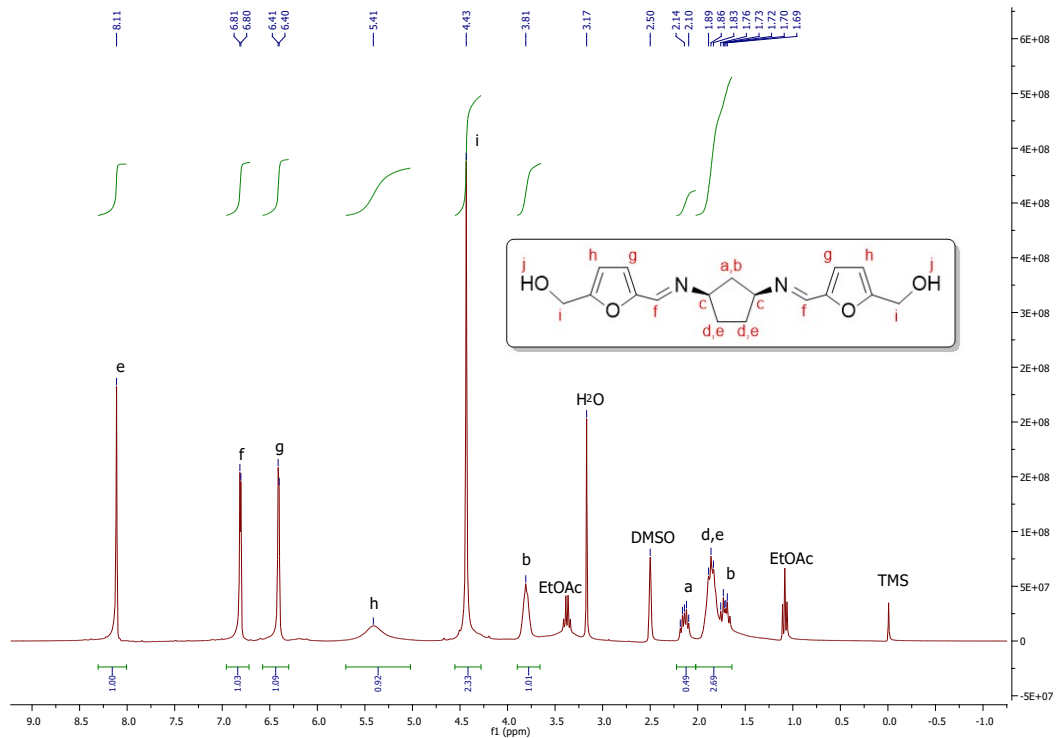

Figure S2.1.40: <sup>1</sup>H-NMR spectrum of **9** in DMSO-*d*<sub>6</sub>.

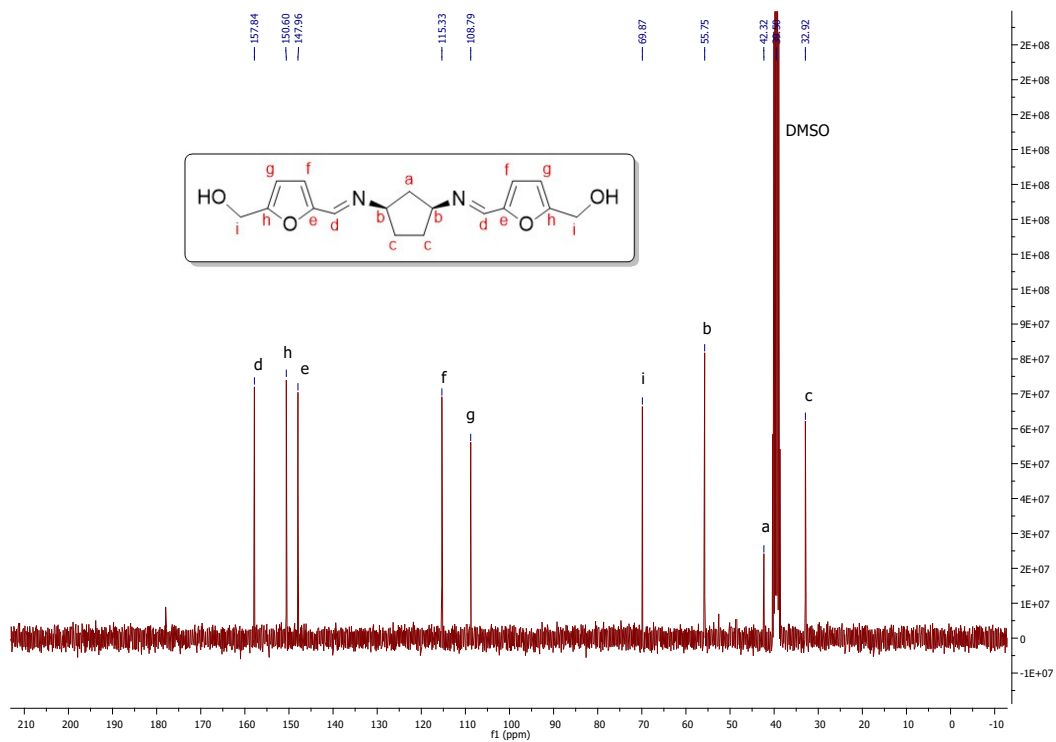

Figure S2.1.41: <sup>13</sup>C-NMR spectrum of **9** in DMSO-*d*<sub>6</sub>.

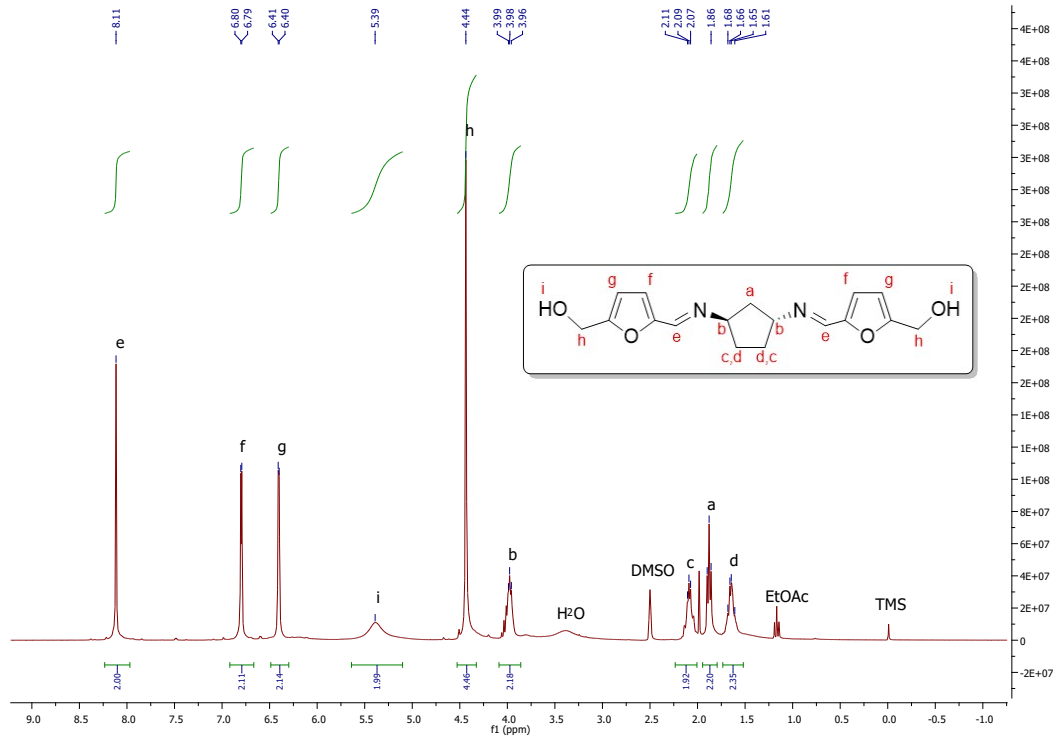

Figure S2.1.42:  $^1\text{H}$ -NMR spectrum of **10** in  $\text{DMSO-}d_6$ .

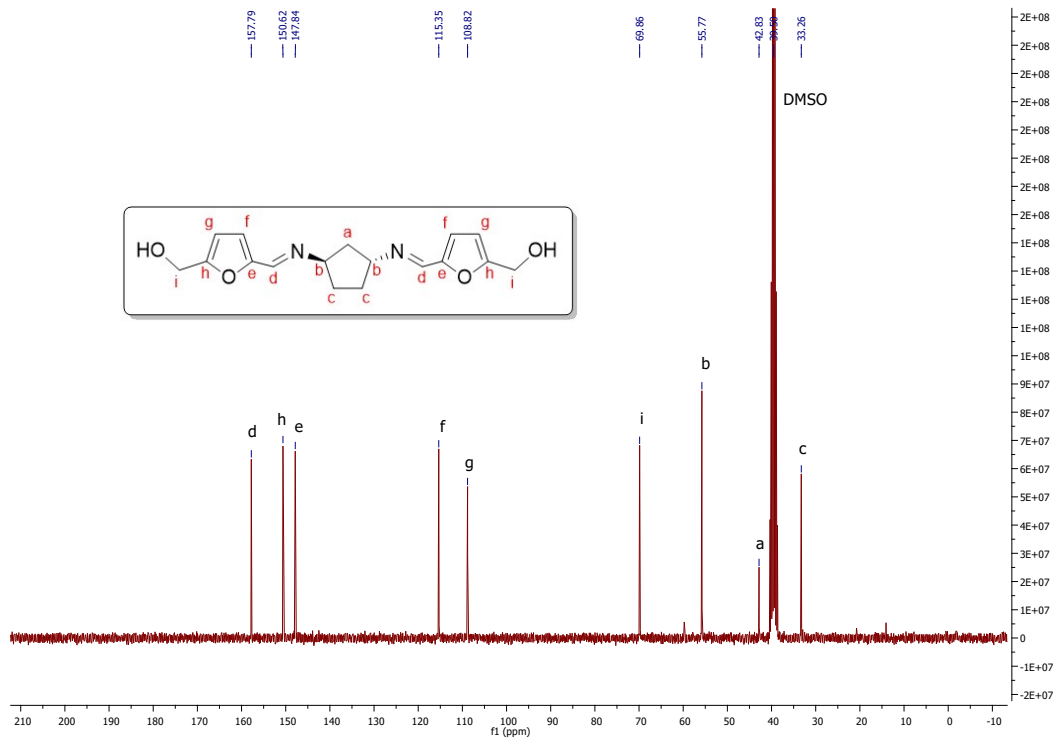

Figure S2.1.43:  $^{13}\text{C}$ -NMR spectrum of **10** in  $\text{DMSO-}d_6$ .

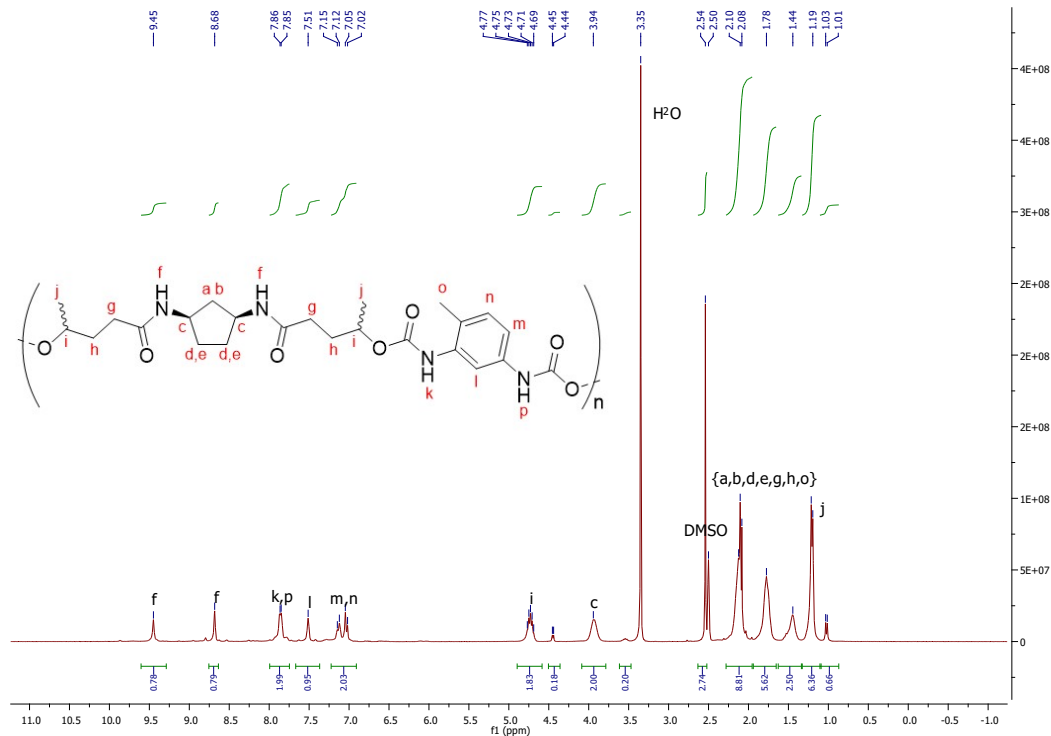

Figure S2.1.44:  $^1\text{H-NMR}$  spectrum of polyurethane derived from **TDI** and triblock **5** in  $\text{DMSO-d}_6$ .

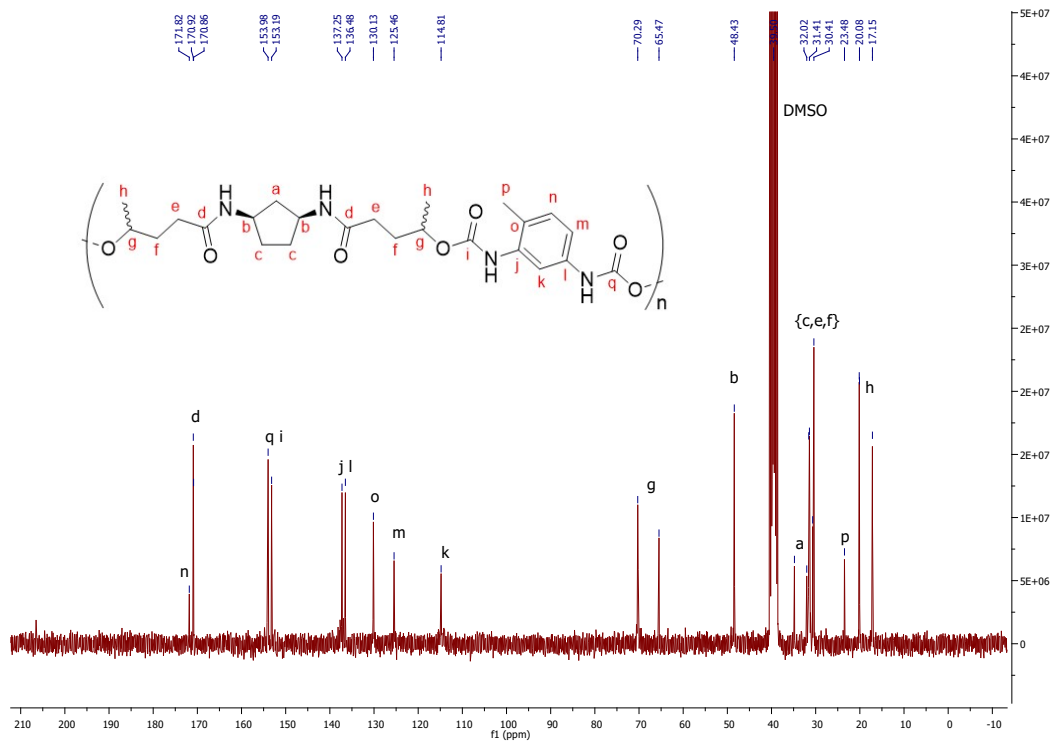

Figure S2.1.45:  $^{13}\text{C-NMR}$  spectrum of polyurethane derived from **TDI** and triblock **5** in  $\text{DMSO-d}_6$ .

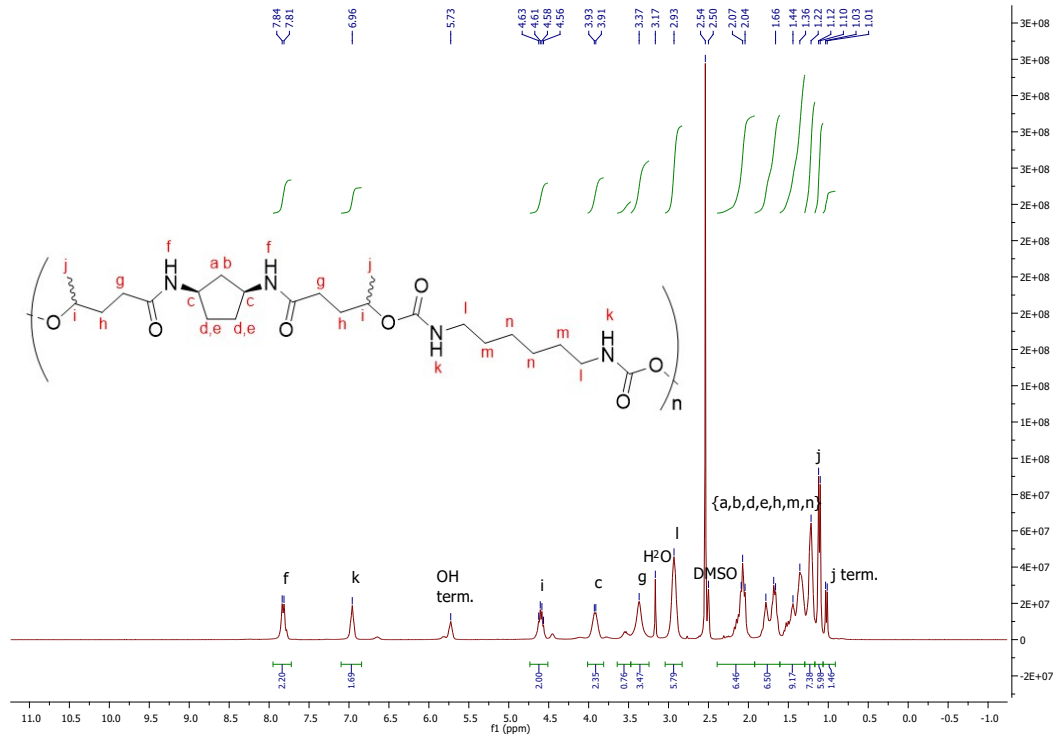

Figure S2.1.46:  $^1\text{H}$ -NMR spectrum of polyurethane derived from **HDI** and triblock **5** in  $\text{DMSO-}d_6$ .

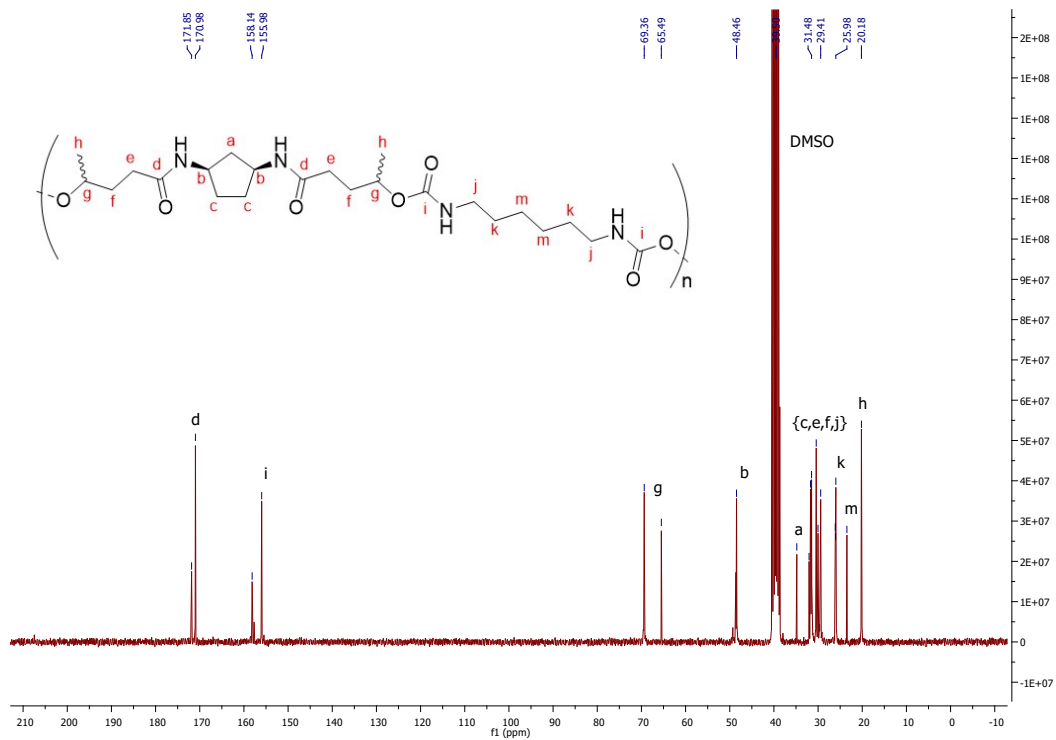

Figure S2.1.47:  $^{13}\text{C}$ -NMR spectrum of polyurethane derived from **HDI** and triblock **5** in  $\text{DMSO-}d_6$ .

S2.2 FT-IR spectroscopy:

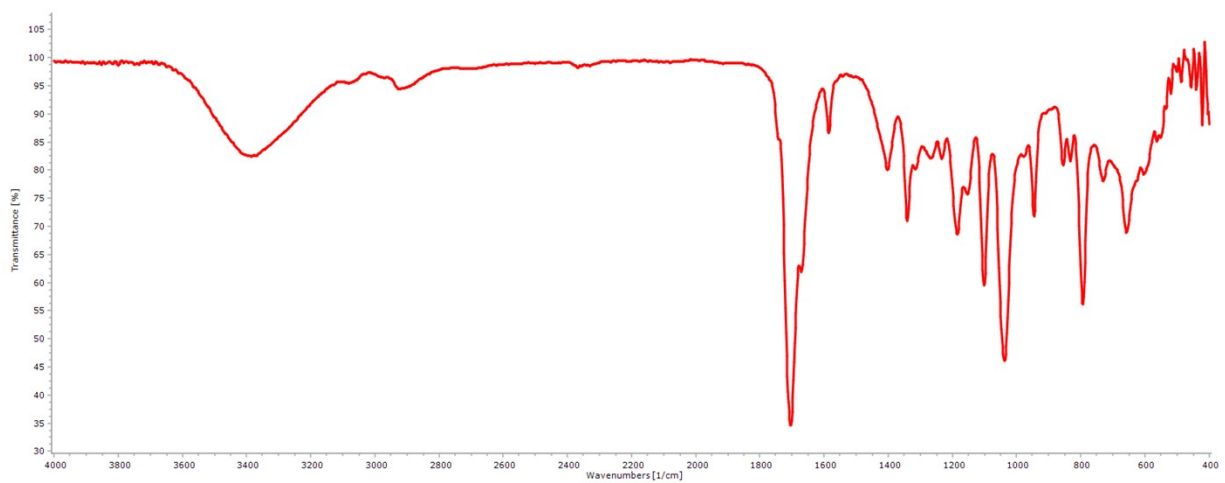

Figure S2.2.1: FTIR spectrum of 4-HCP.

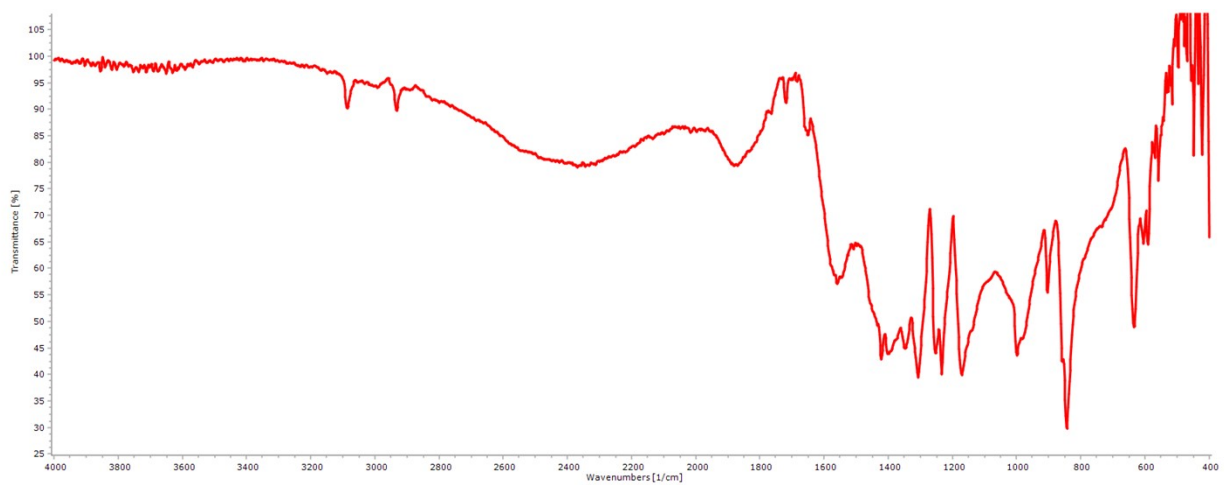

Figure S2.2.2: FTIR spectrum of CPDO.

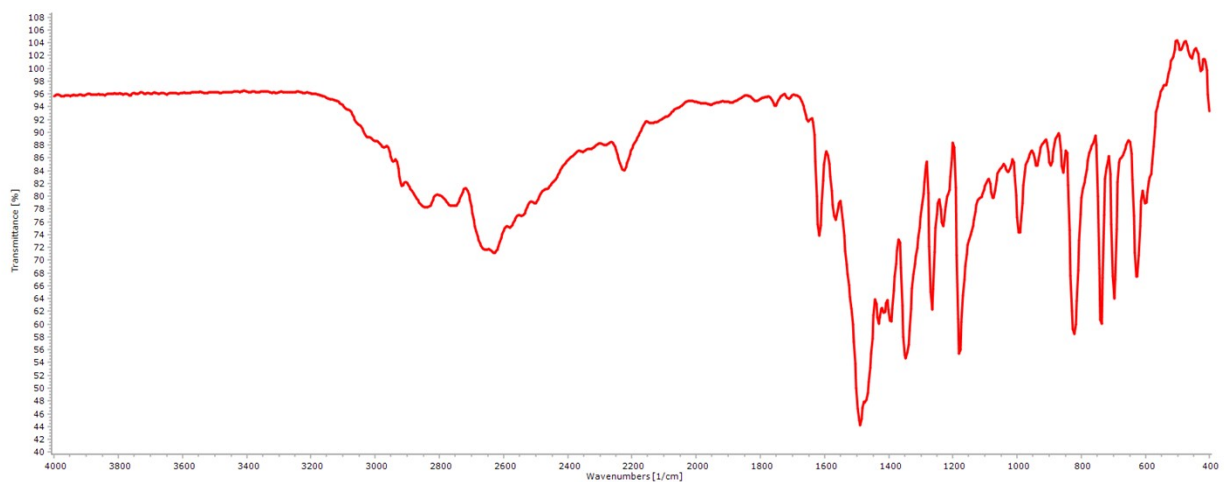

Figure S2.2.3: FTIR spectrum of compound **1**.

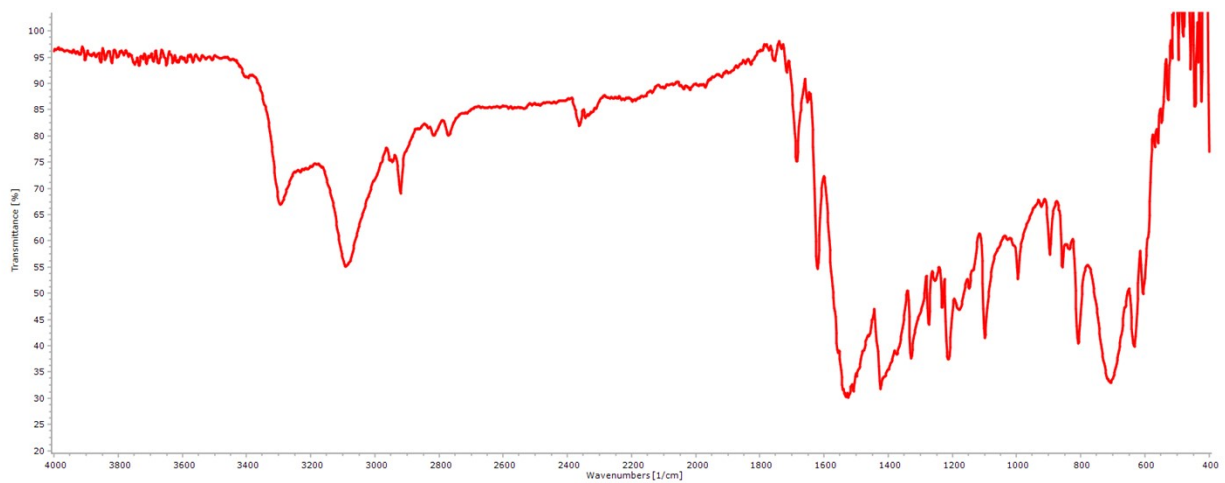

Figure S2.2.4: FTIR spectrum of **CPDI**.

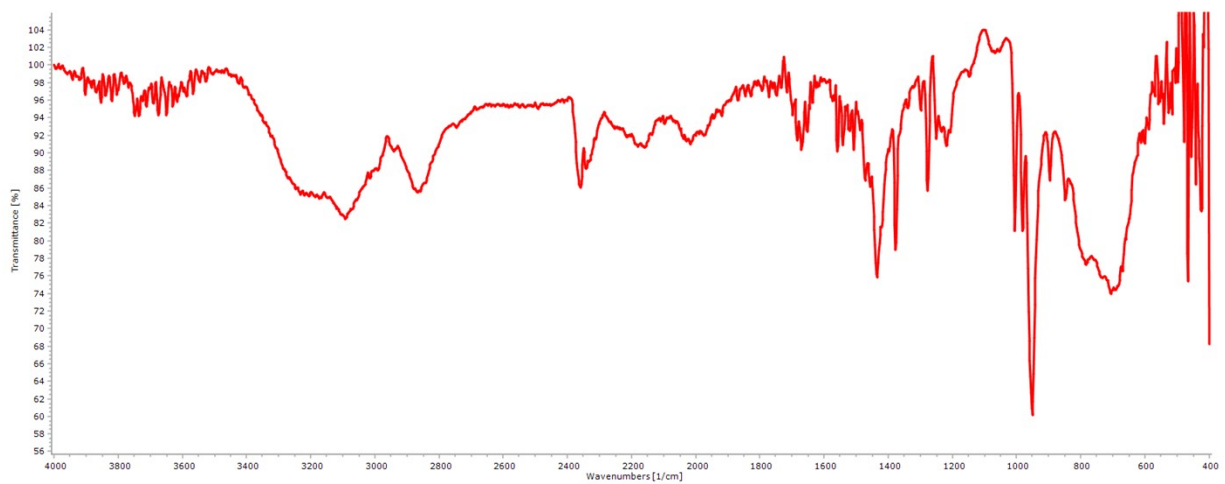

Figure S2.2.5: FTIR spectrum of CPDX.



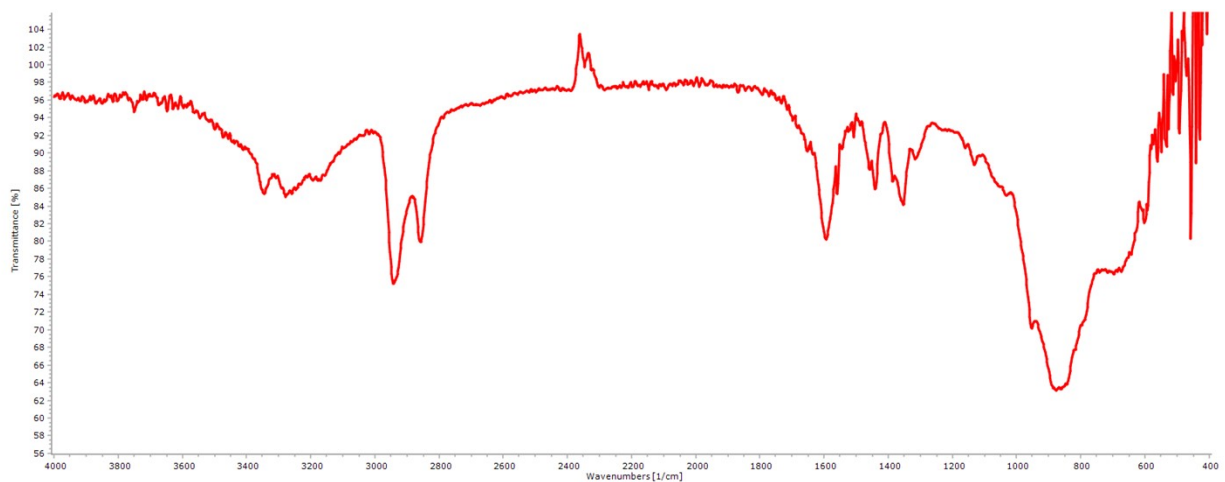

Figure S2.2.6: FTIR spectrum of CPDA (distillate, cis-trans ratio = 1:1).

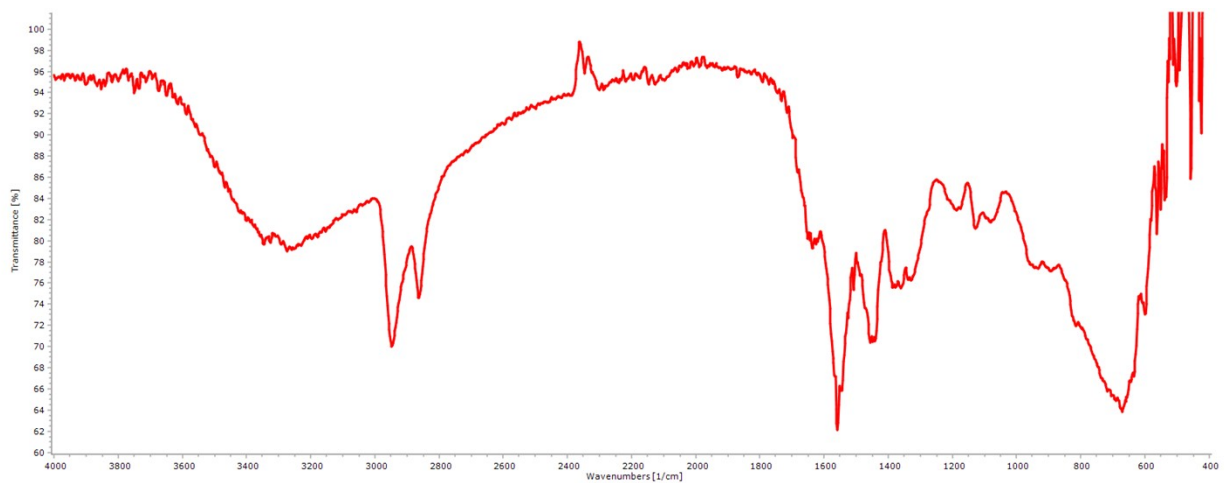

Figure S2.2.7: FTIR spectrum of CPDA-dimer.

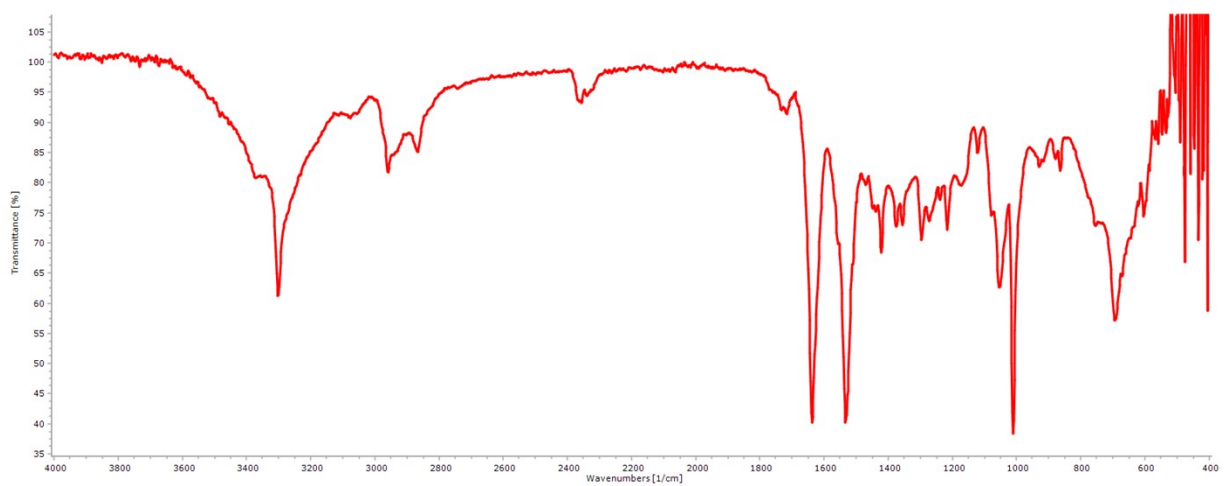

Figure S2.2.8: FTIR spectrum of compound 3.

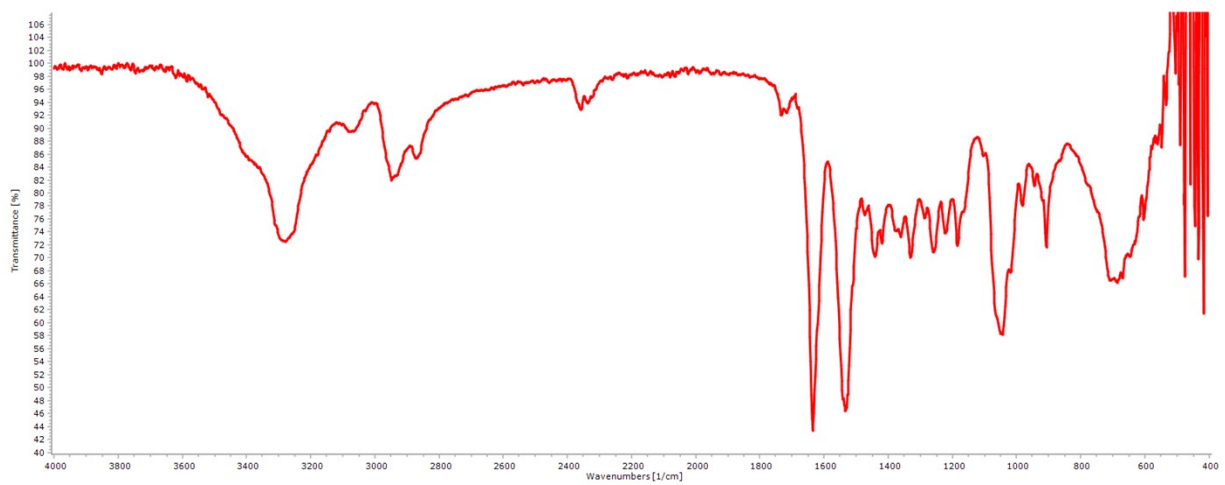

Figure S2.2.9: FTIR spectrum of compound 4.

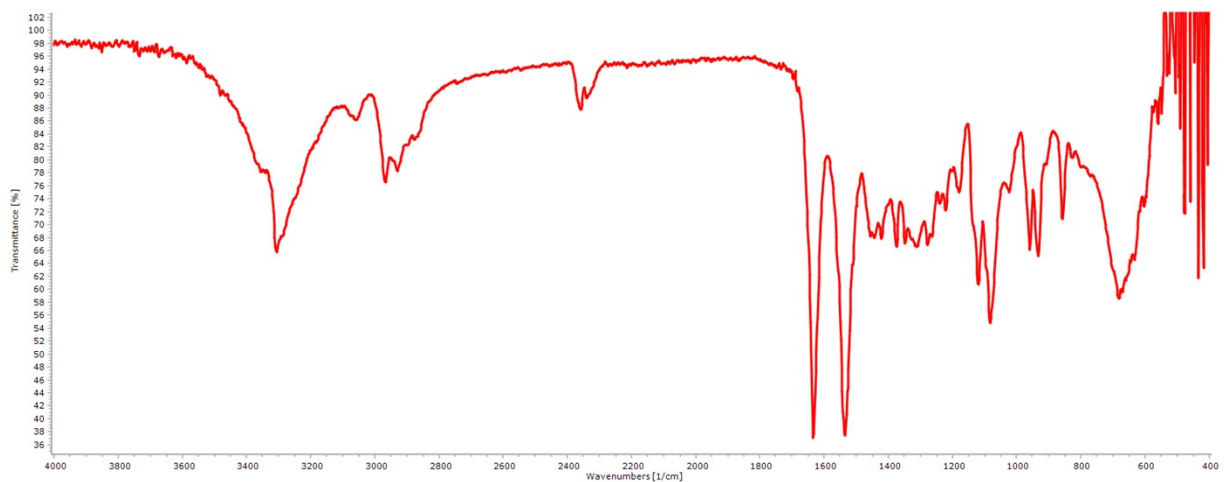

Figure S2.2.10: FTIR spectrum of compound 5.

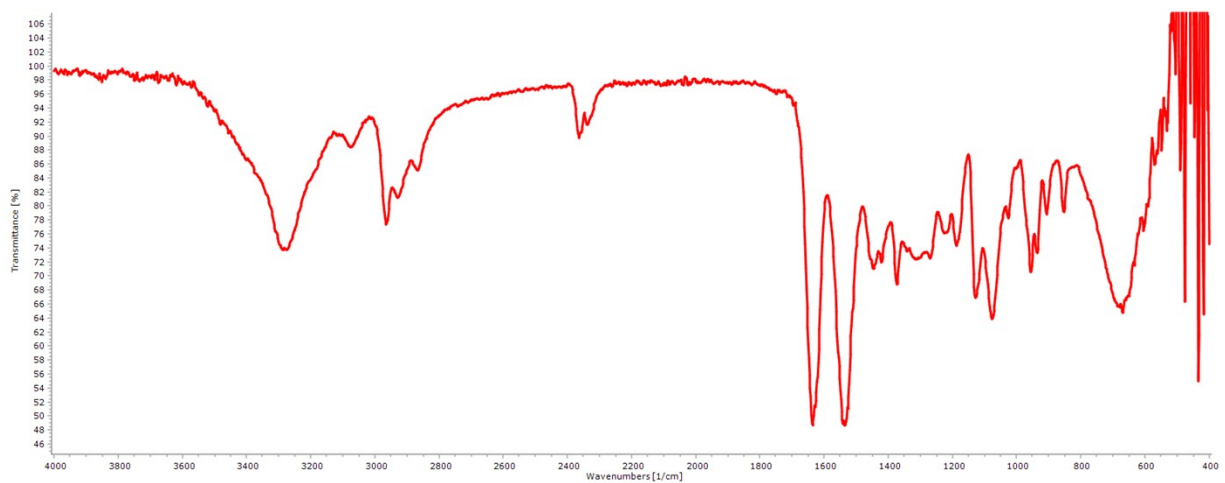

Figure S2.2.11: FTIR spectrum of compound 6.

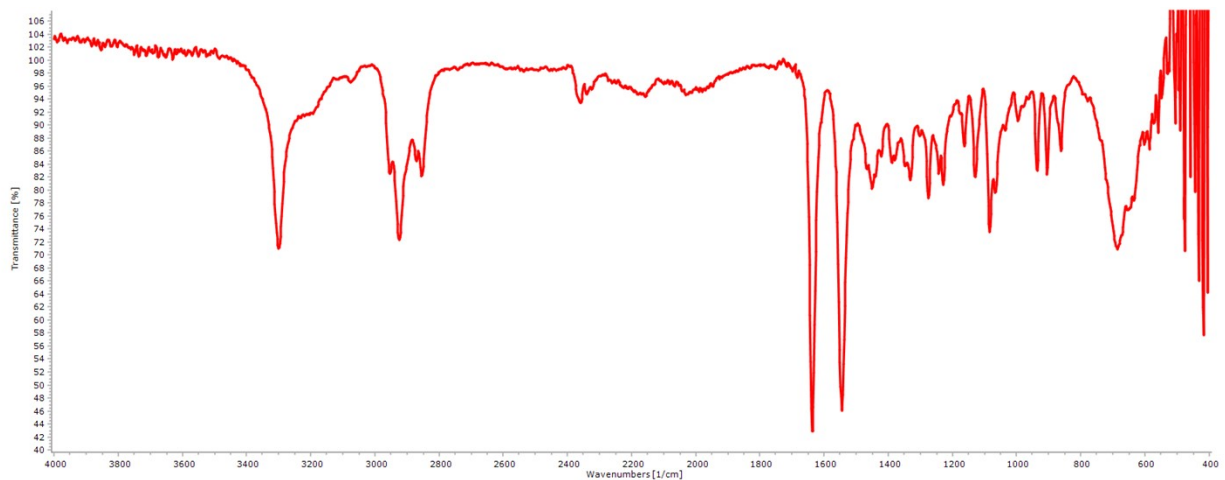

Figure S2.2.12: FTIR spectrum of compound 7.

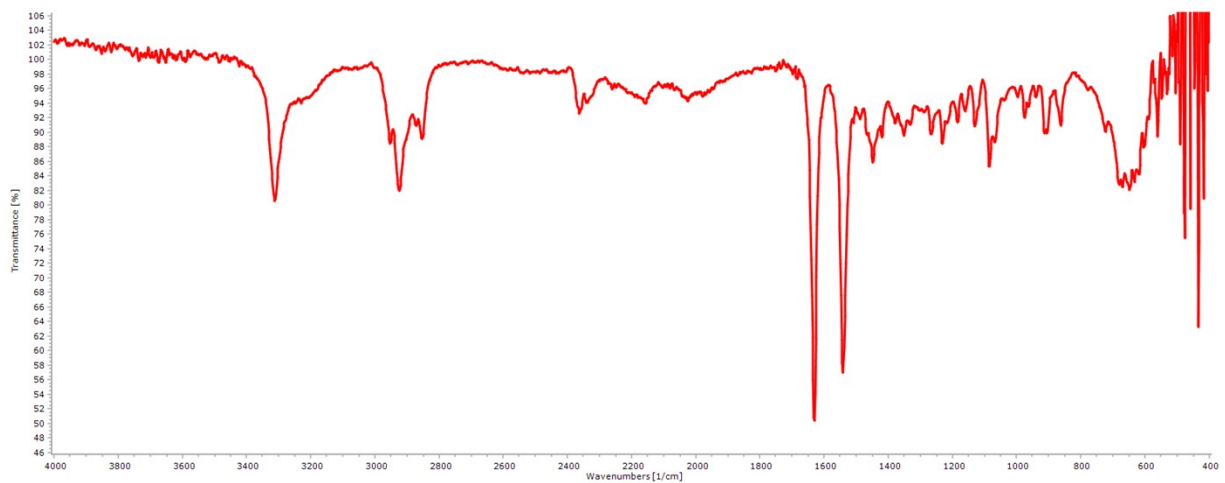

Figure S2.2.13: FTIR spectrum of compound 8.

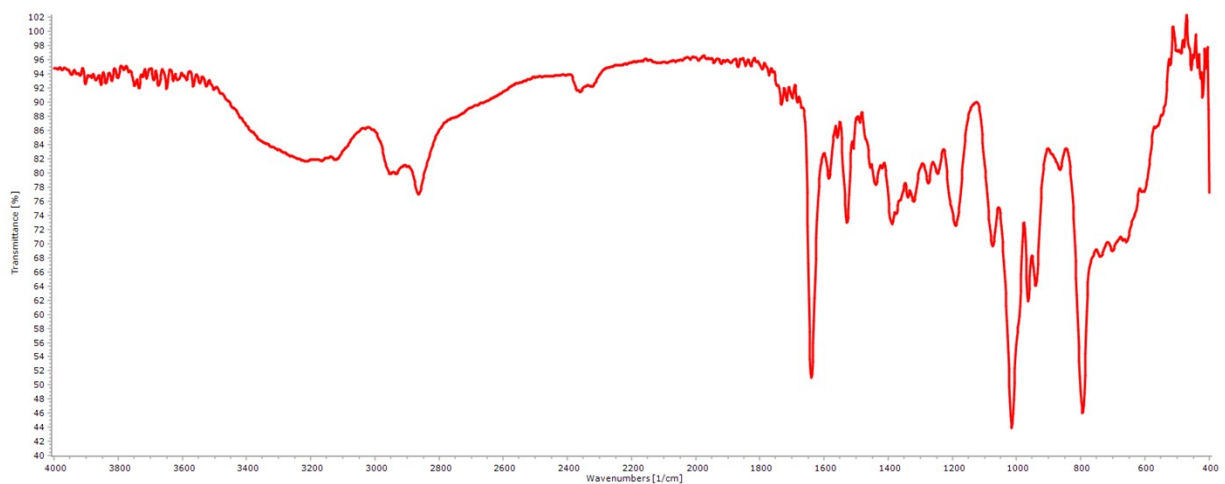

Figure S2.2.14: FTIR spectrum of compound **9**.

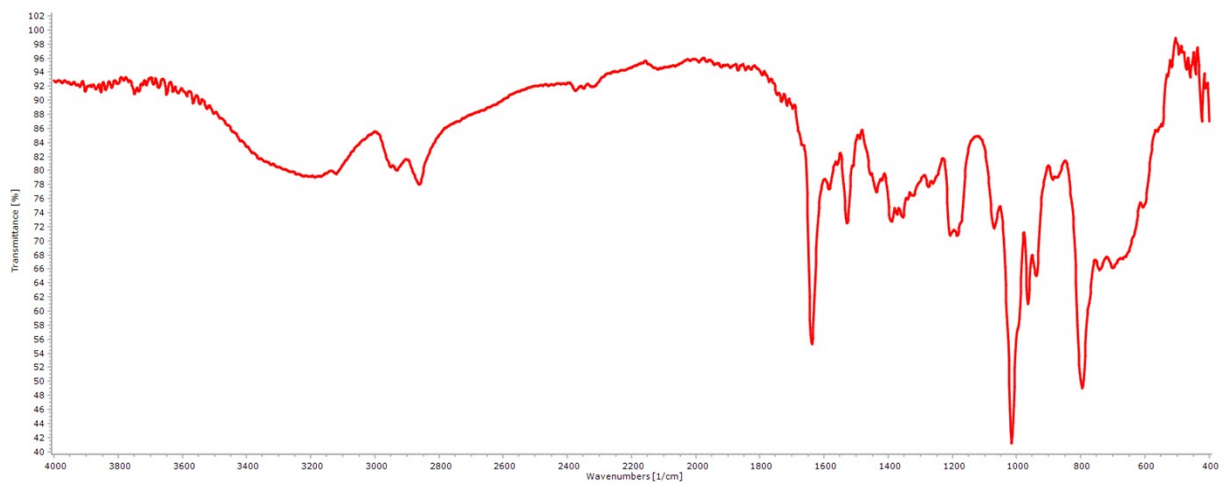

Figure S2.2.15: FTIR spectrum of compound **10**.

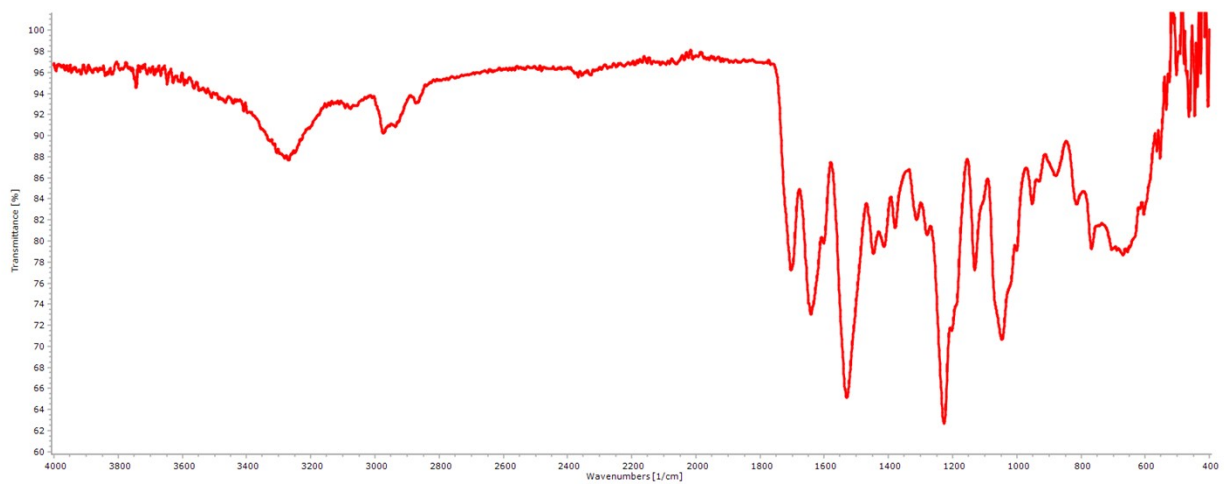

Figure S2.2.16: FTIR spectrum of the polyurethane derived from **TDI** and triblock 5.

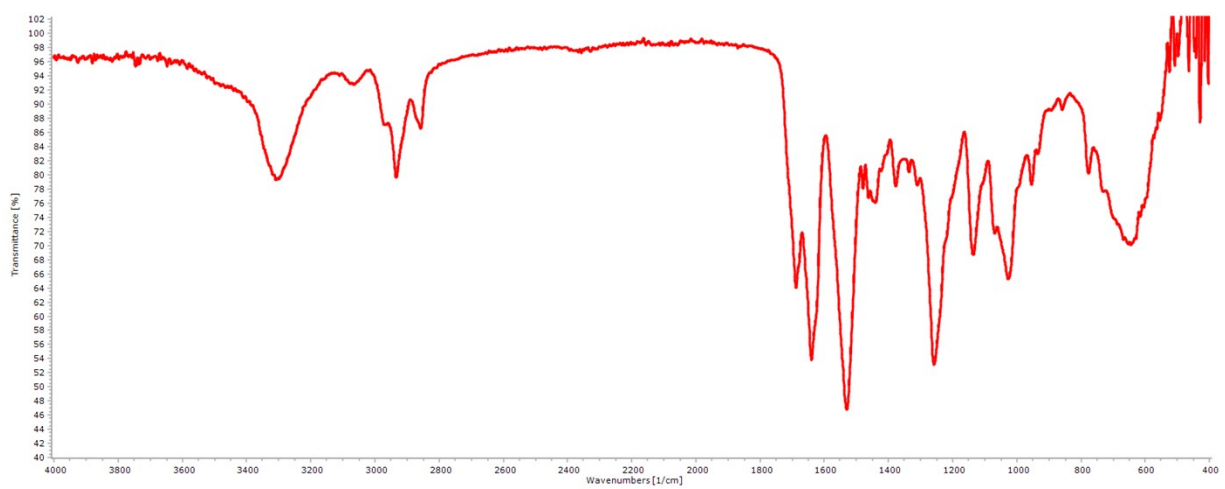

Figure S2.2.17: FTIR spectrum of the polyurethane derived from **HDI** and triblock 5.

### S2.3 GC-FID chromatograms:

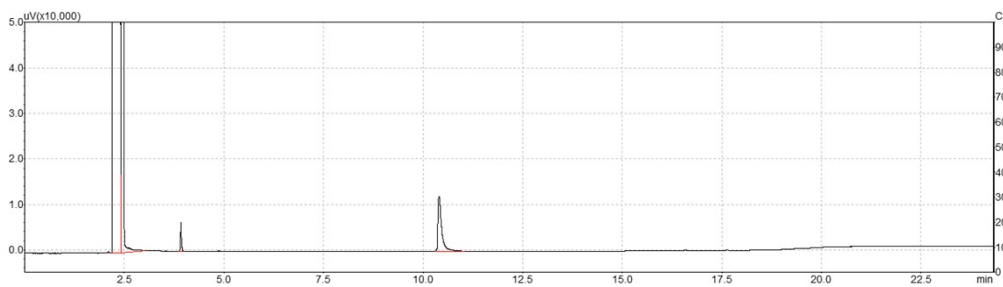

Figure S2.3.1: Gas chromatogram of 4-HCP.

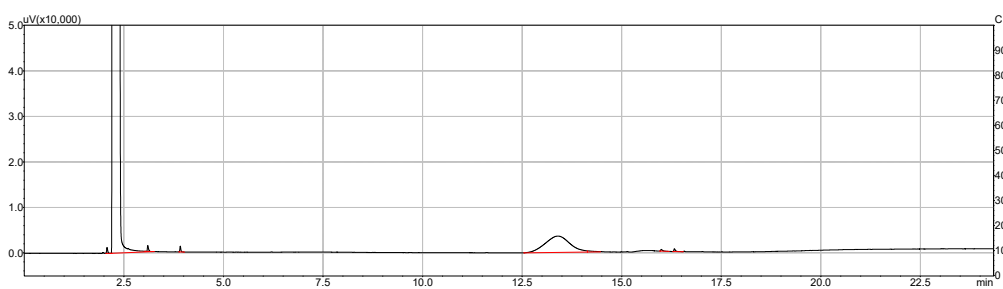

Figure S2.3.2: Gas chromatogram of CPDO.

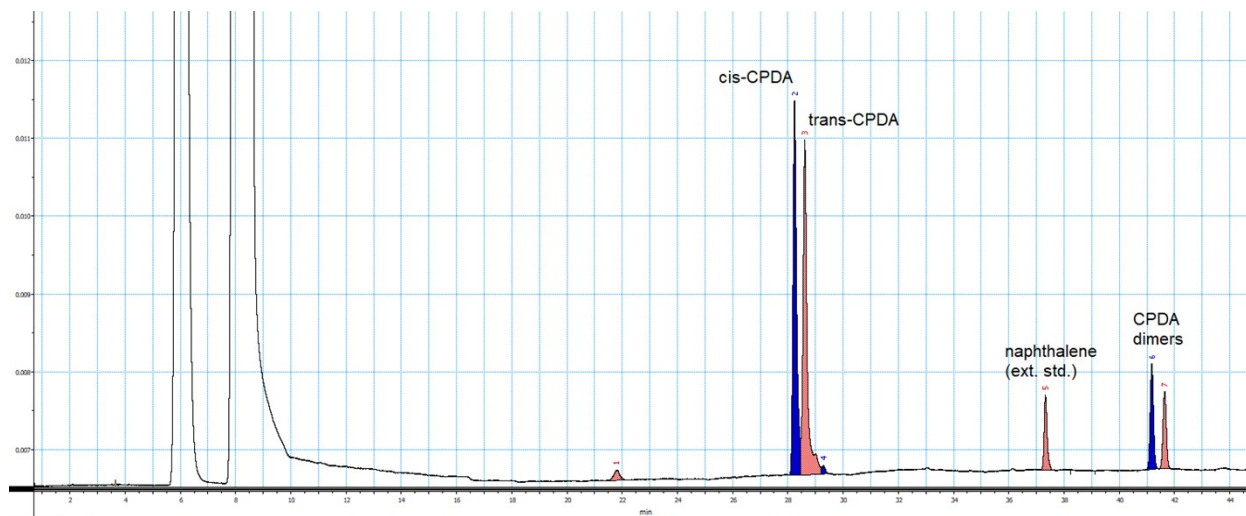

Figure S2.3.3: Representative gas chromatogram of a crude reaction mixture from CPDX to CPDA hydrogenation.

## S2.4 High-resolution mass-spectrometry (HR-MS):

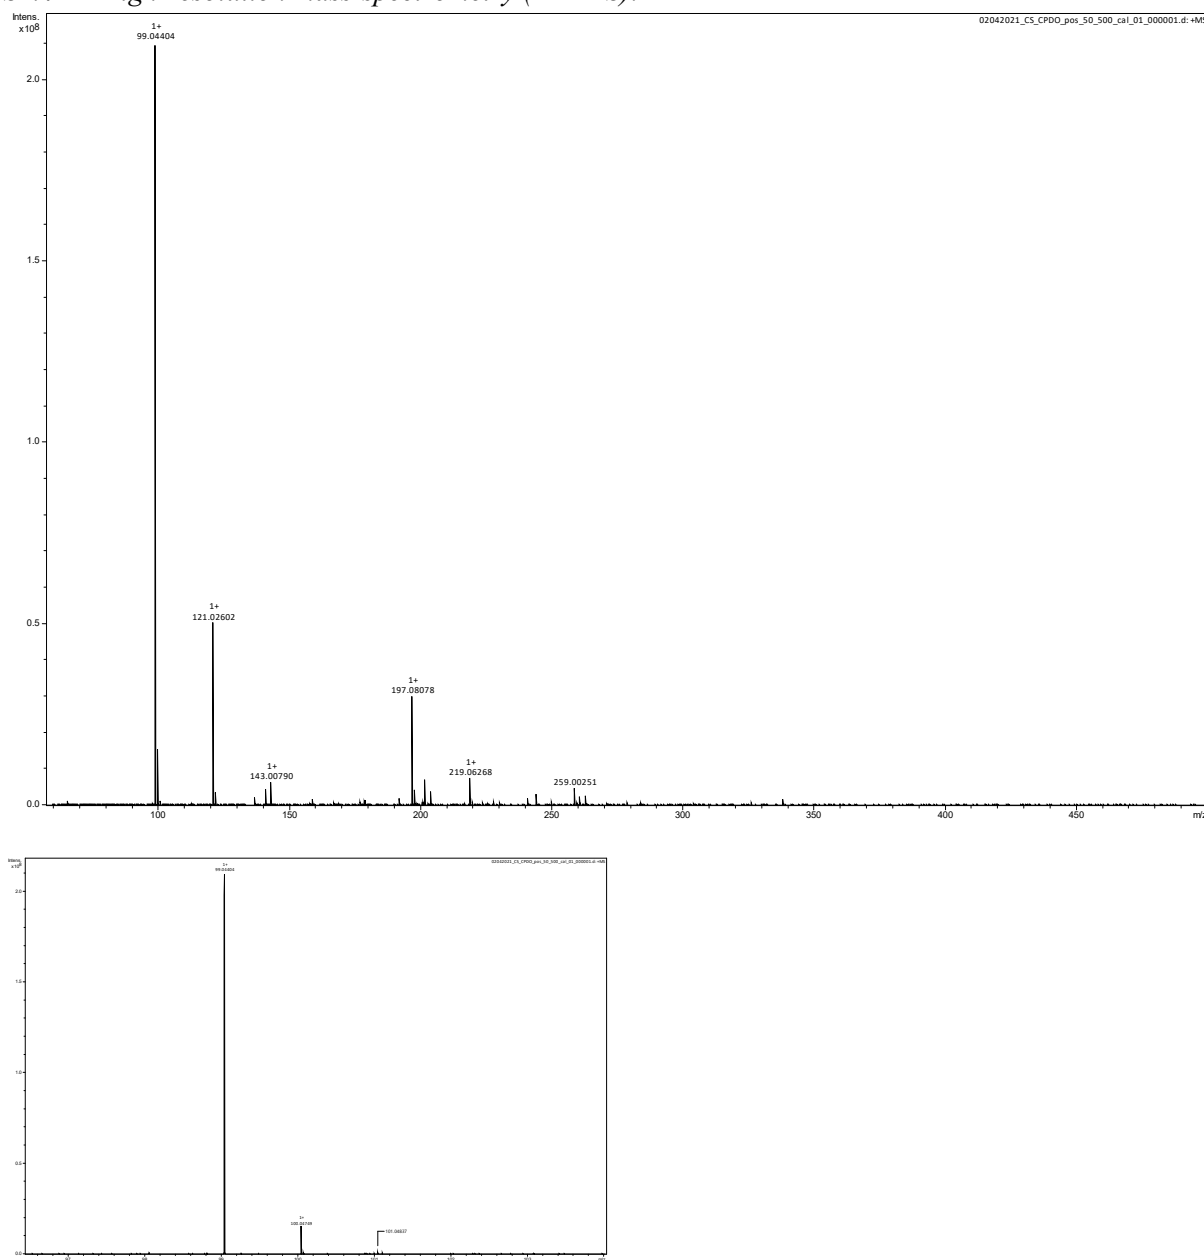

Figure S2.4.1: HR-MS analysis in ESI+ mode of CPDO; full spectrum (top), and zoom of  $[\text{CPDO} + \text{H}]^+$  (bottom).



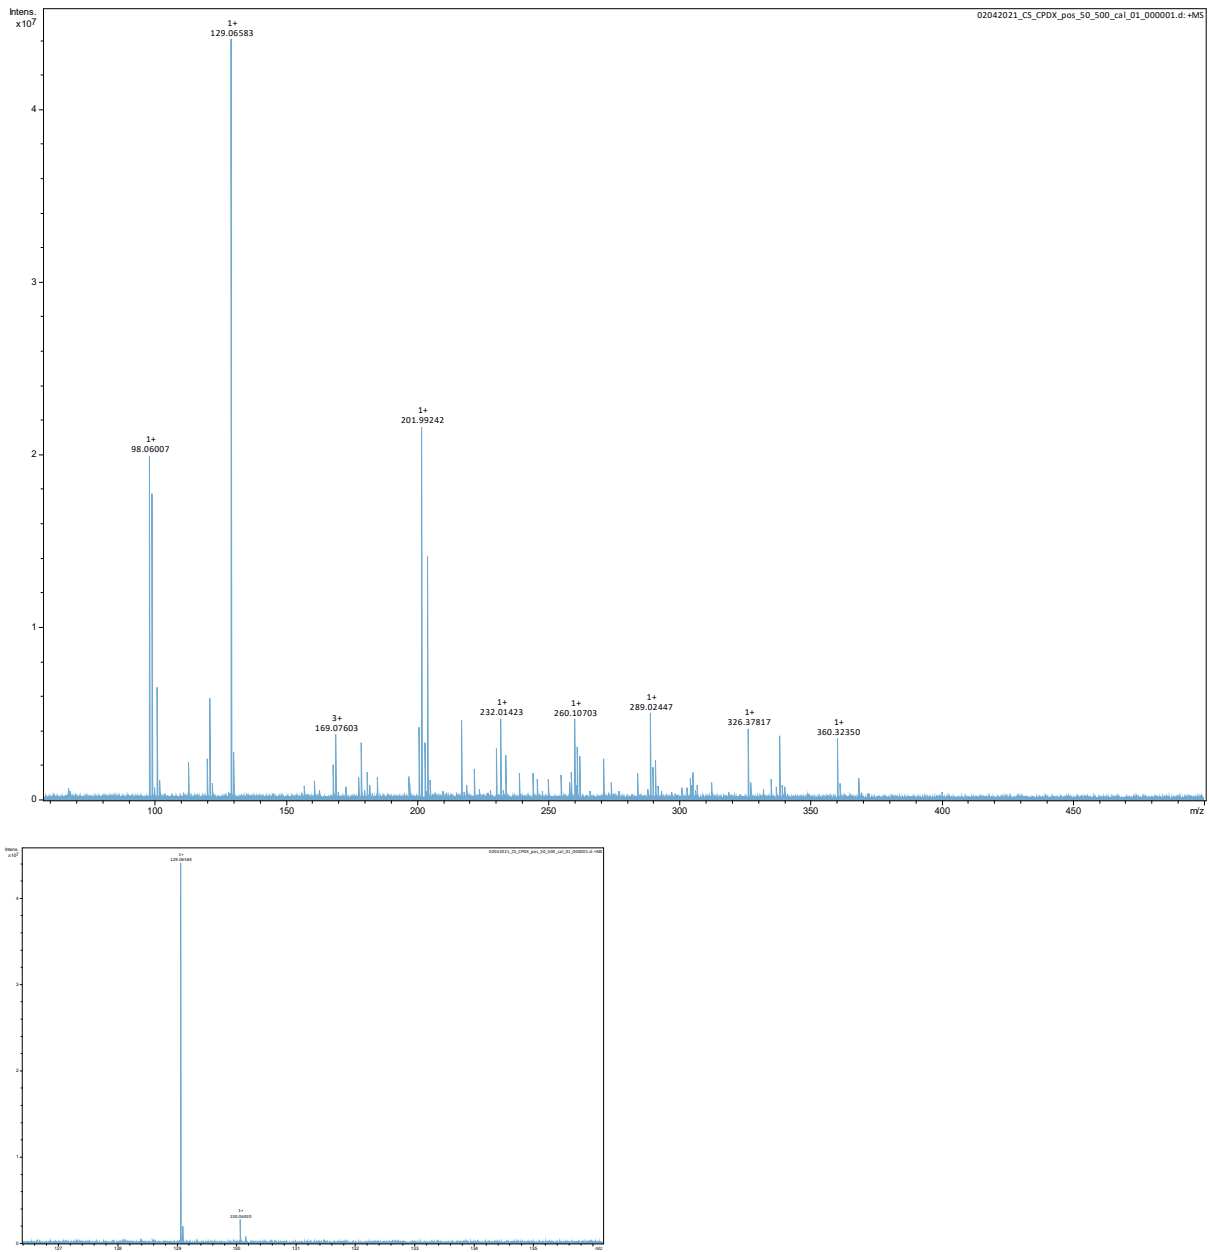

Figure S2.4.2: HR-MS analysis in ESI+ mode of CPDX; full spectrum (top), and zoom of [CPDX + H]<sup>+</sup> (bottom).

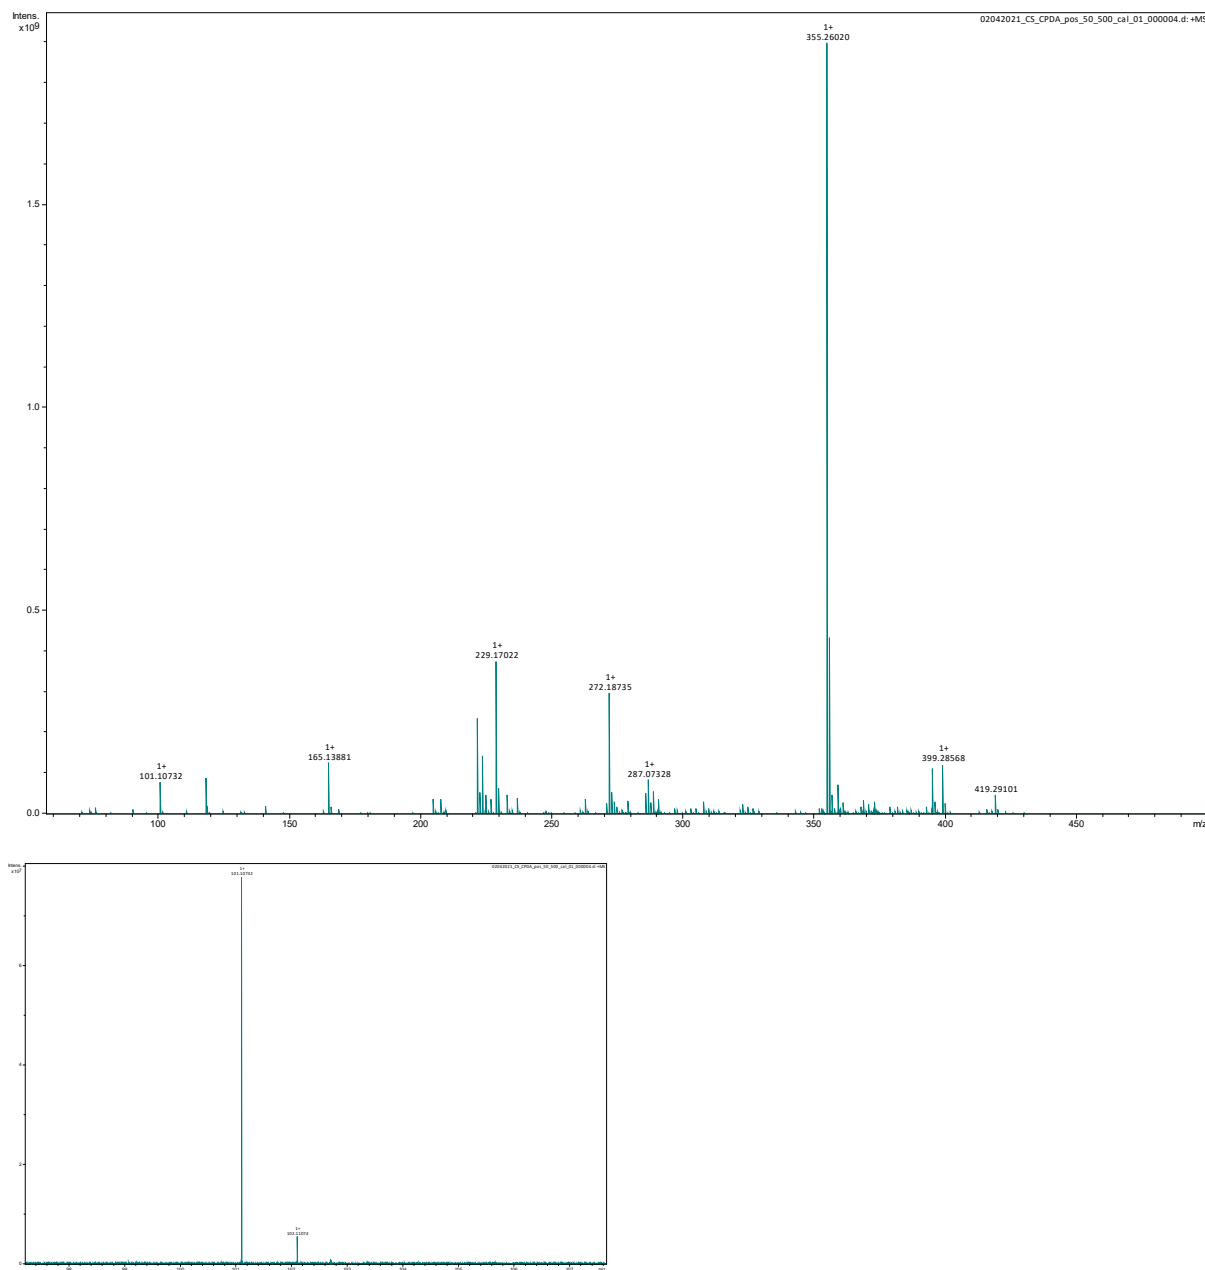

Figure S2.4.3: HR-MS analysis in ESI+ mode of CPDA; full spectrum (top), and zoom of [CPDA + H]<sup>+</sup> (bottom).

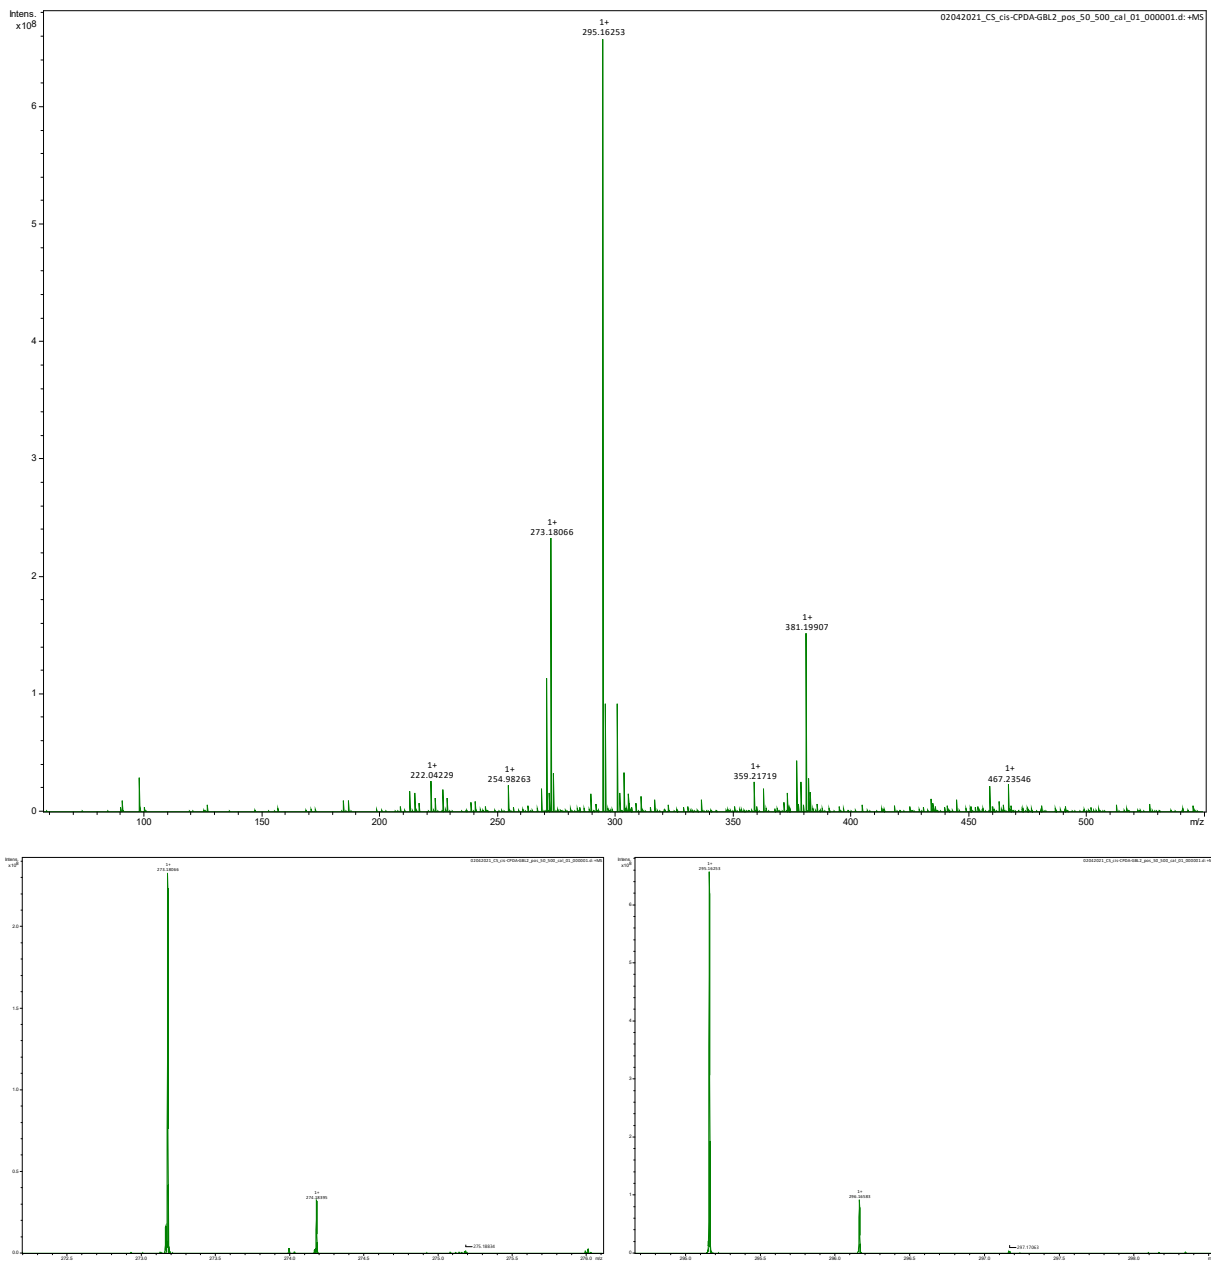

Figure S2.4.4: HR-MS analysis in ESI+ mode of **3**; full spectrum (top); zoom of  $[3 + H]^+$  (bottom-left), and zoom of  $[3 + Na]^+$  (bottom-right).

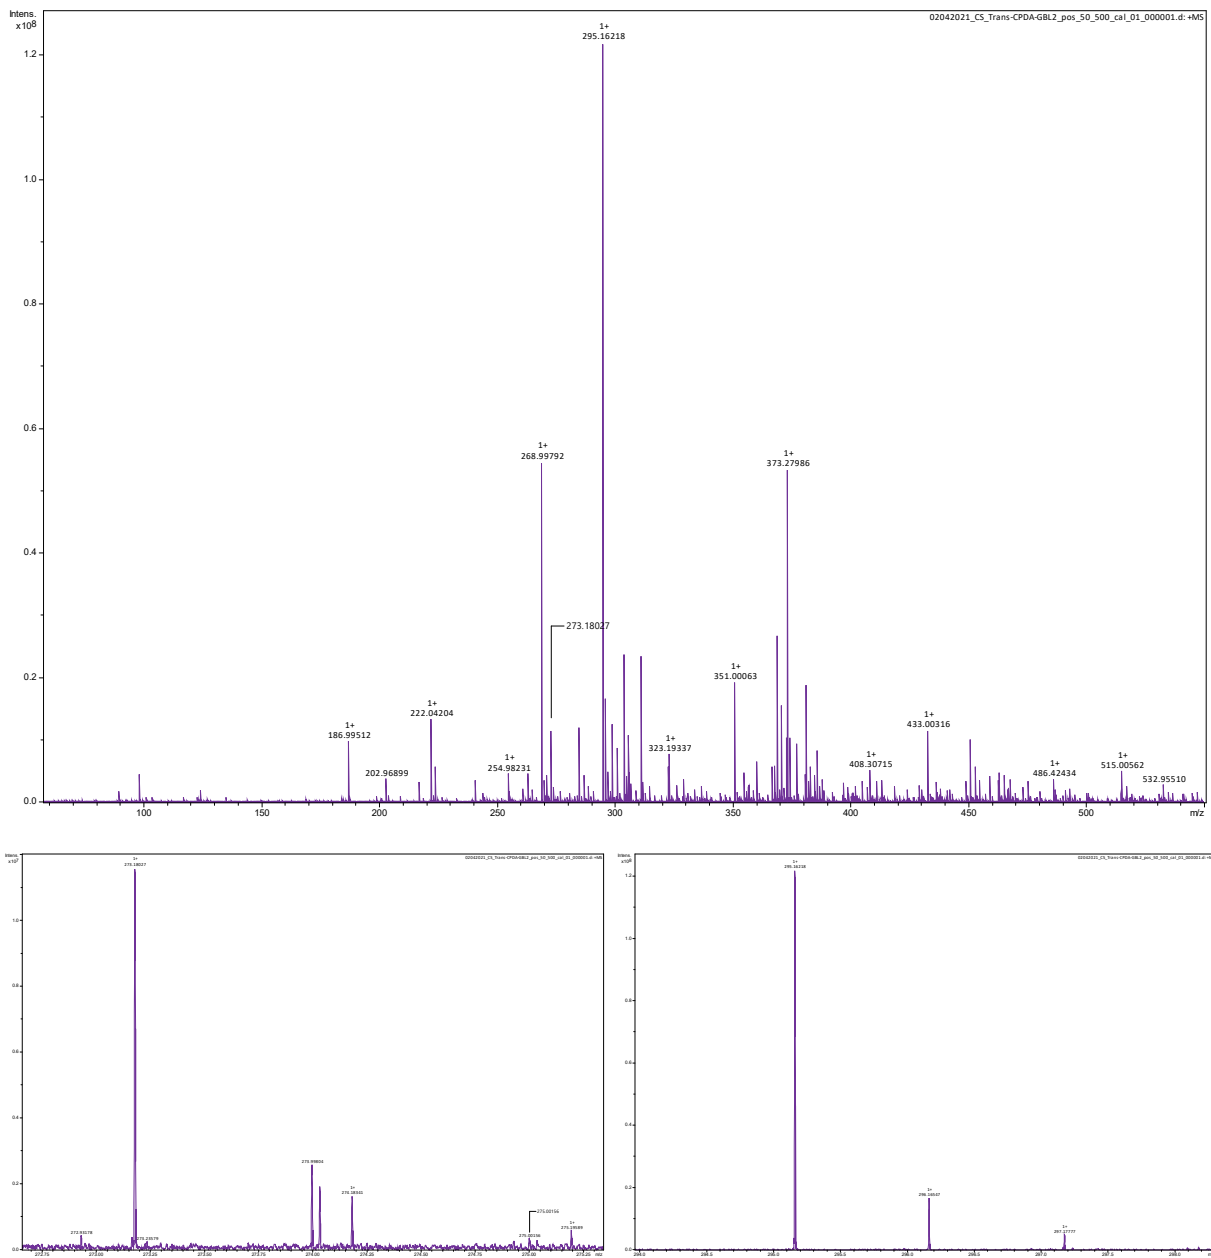

Figure S2.4.4: HR-MS analysis in ESI<sup>+</sup> mode of 4; full spectrum (top); zoom of  $[4 + H]^+$  (bottom-left), and zoom of  $[4 + Na]^+$  (bottom-right).

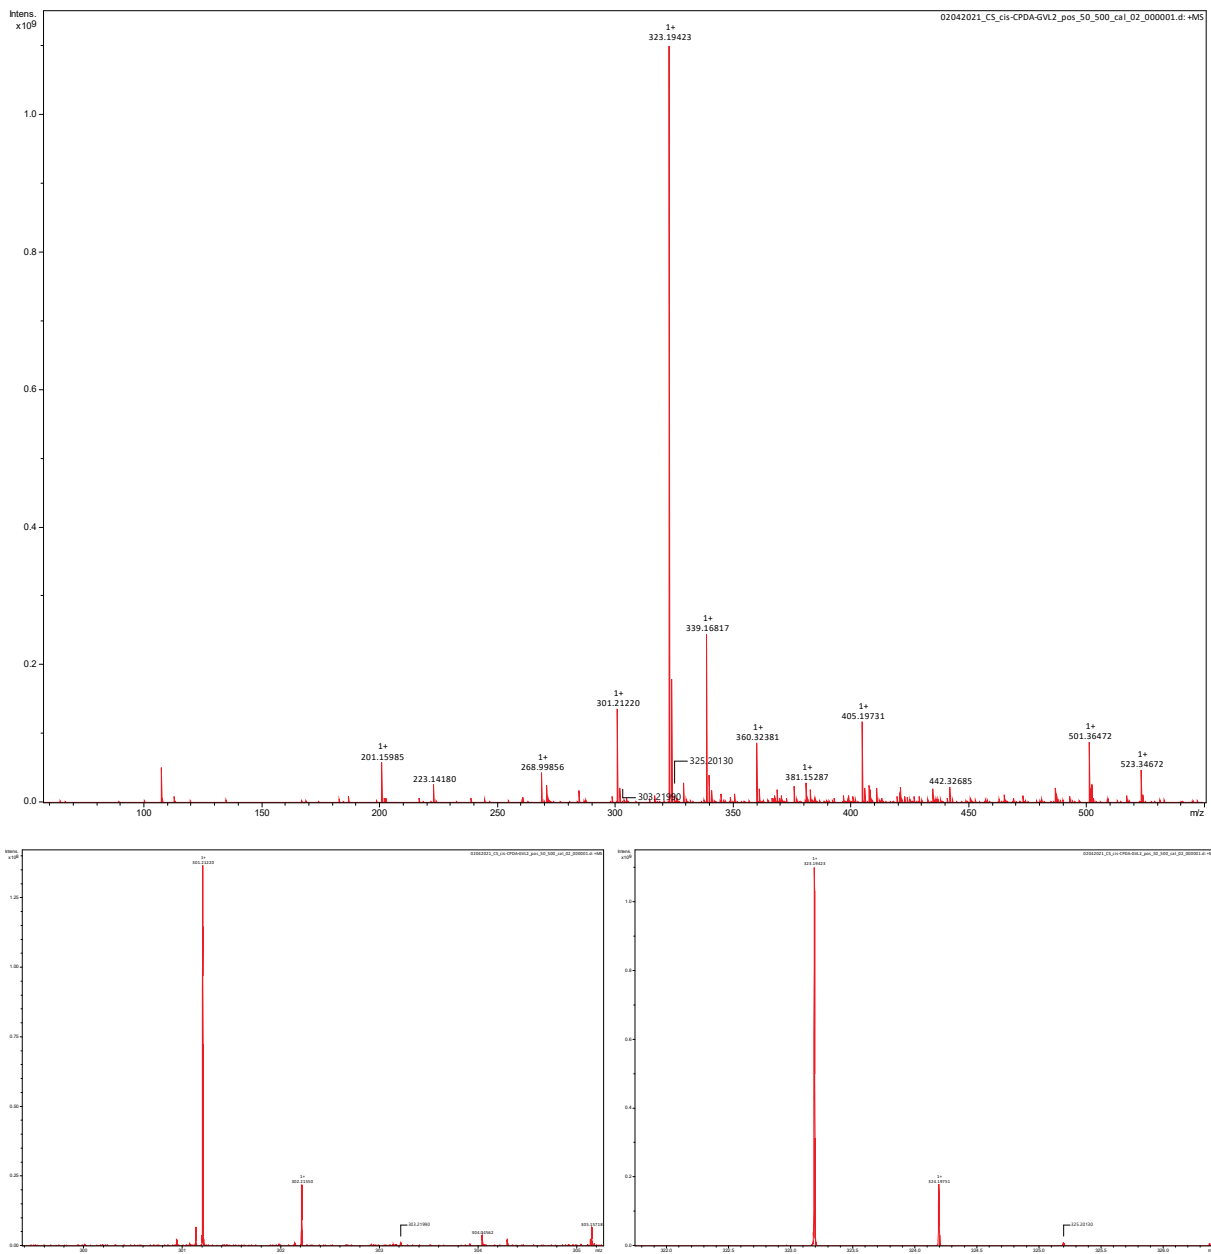

Figure S2.4.5: HR-MS analysis in ESI<sup>+</sup> mode of **5**; full spectrum (top); zoom of [5 + H]<sup>+</sup> (bottom-left), and zoom of [5 + Na]<sup>+</sup> (bottom-right).

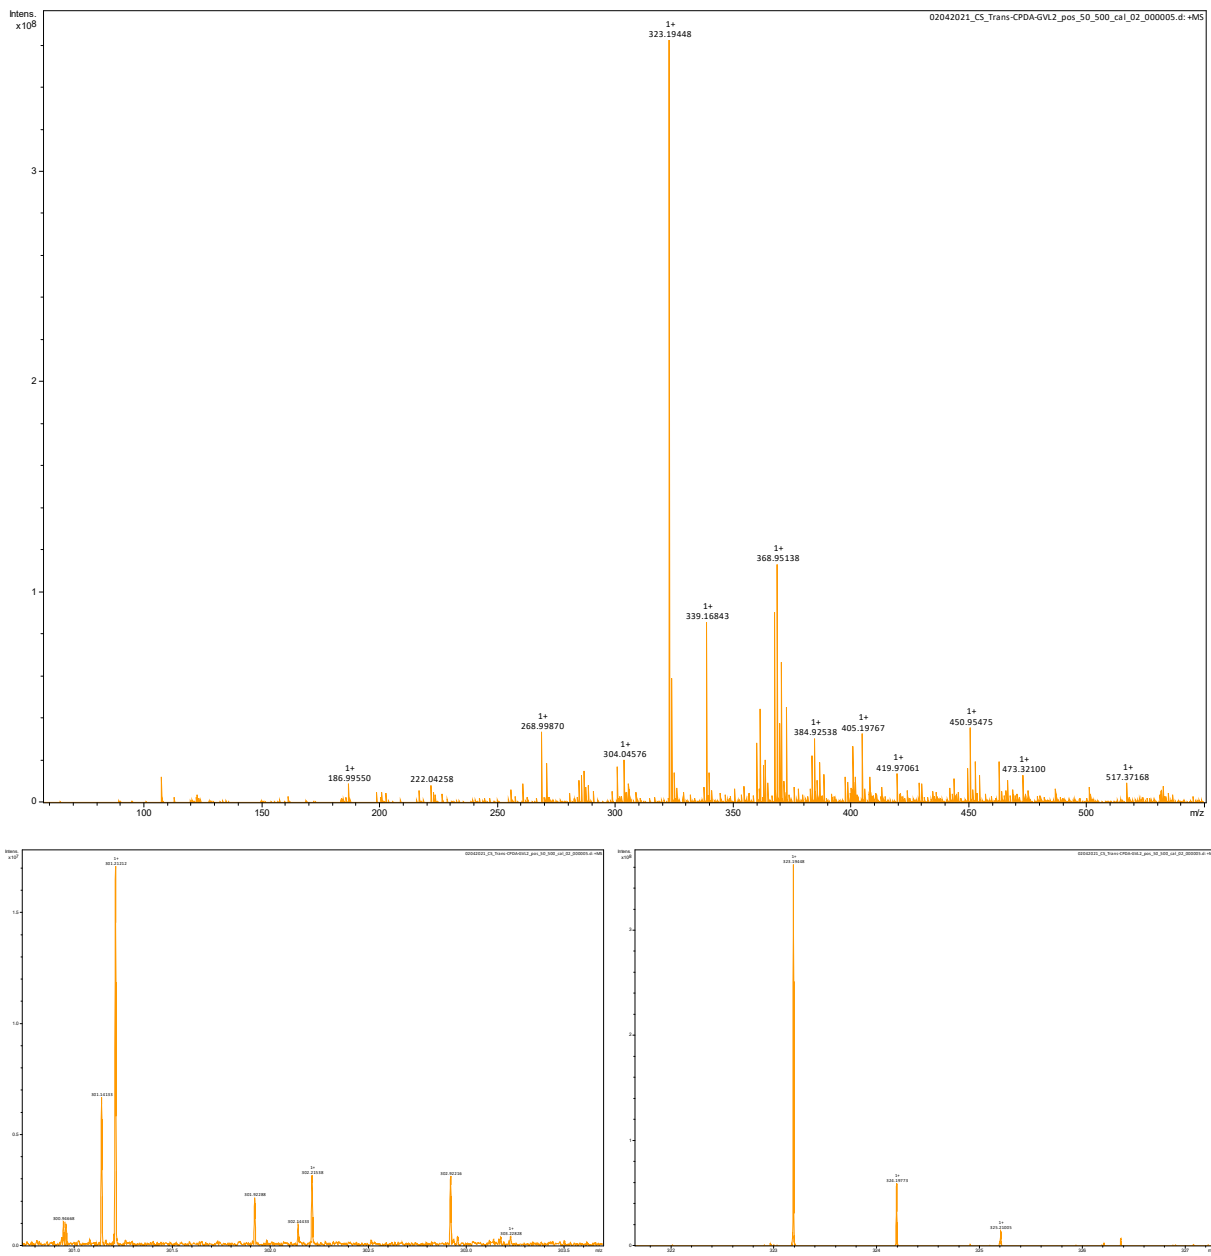

Figure S2.4.6: HR-MS analysis in ESI<sup>+</sup> mode of **6**; full spectrum (top); zoom of [6 + H]<sup>+</sup> (bottom-left), and zoom of [6 + Na]<sup>+</sup> (bottom-right).

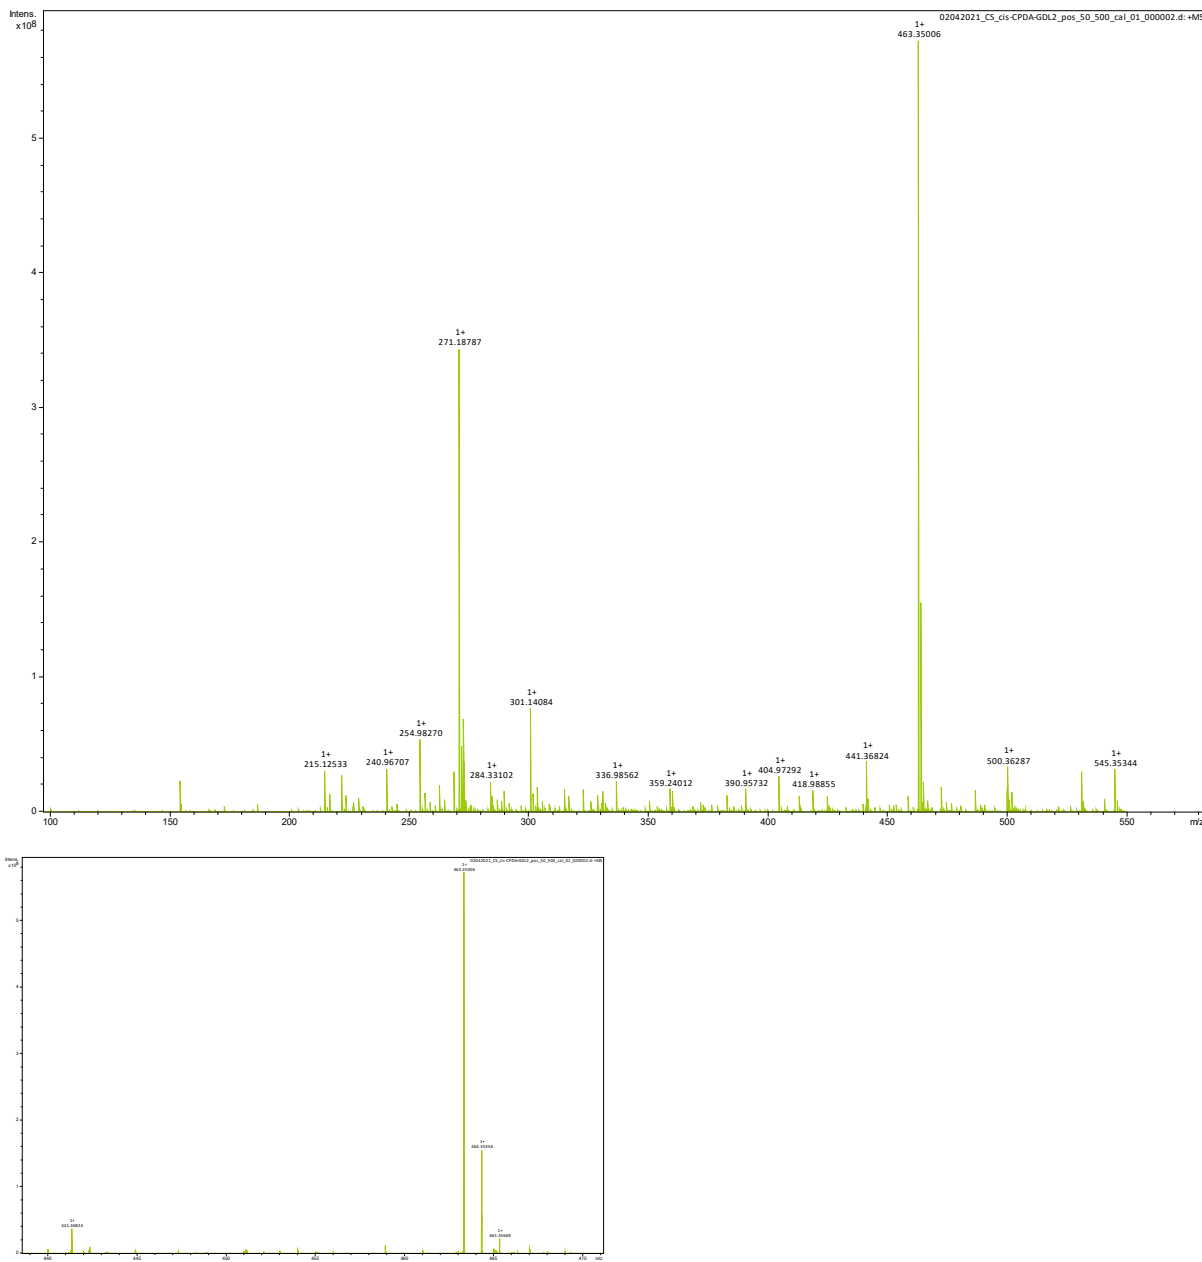

Figure S2.4.7: HR-MS analysis in ESI+ mode of 7; full spectrum (top); zoom of  $[7 + H]^+$  and  $[7 + Na]^+$  (bottom).

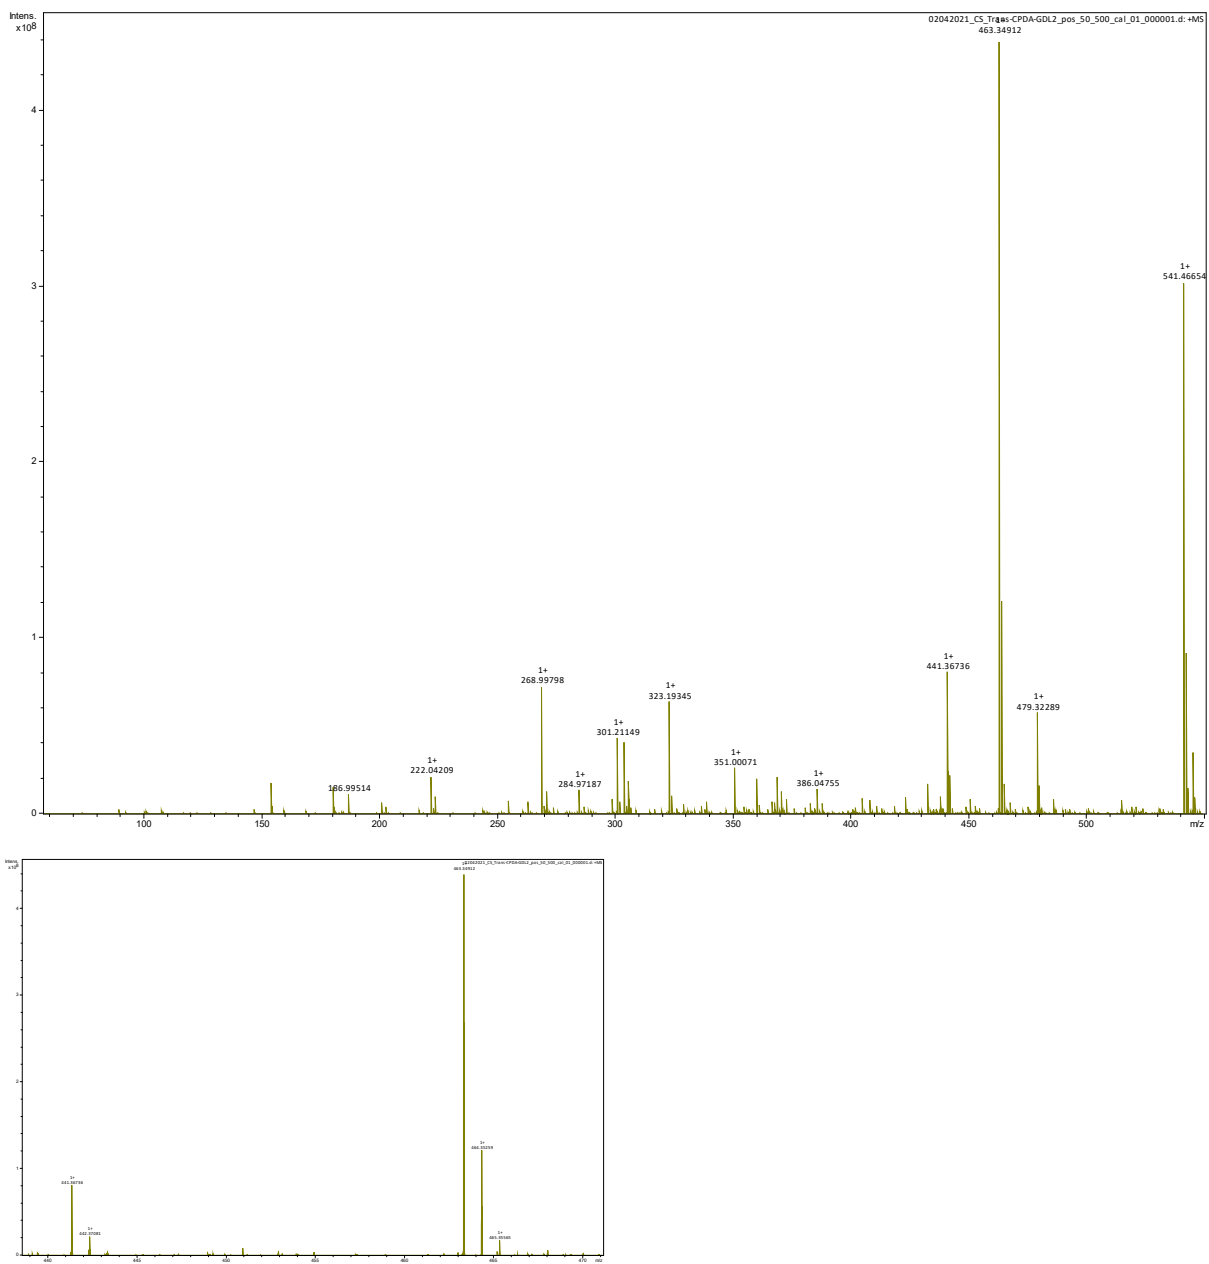

Figure S2.4.8: HR-MS analysis in ESI+ mode of **8**; full spectrum (top); zoom of  $[8 + H]^+$  and  $[8 + Na]^+$  (bottom).



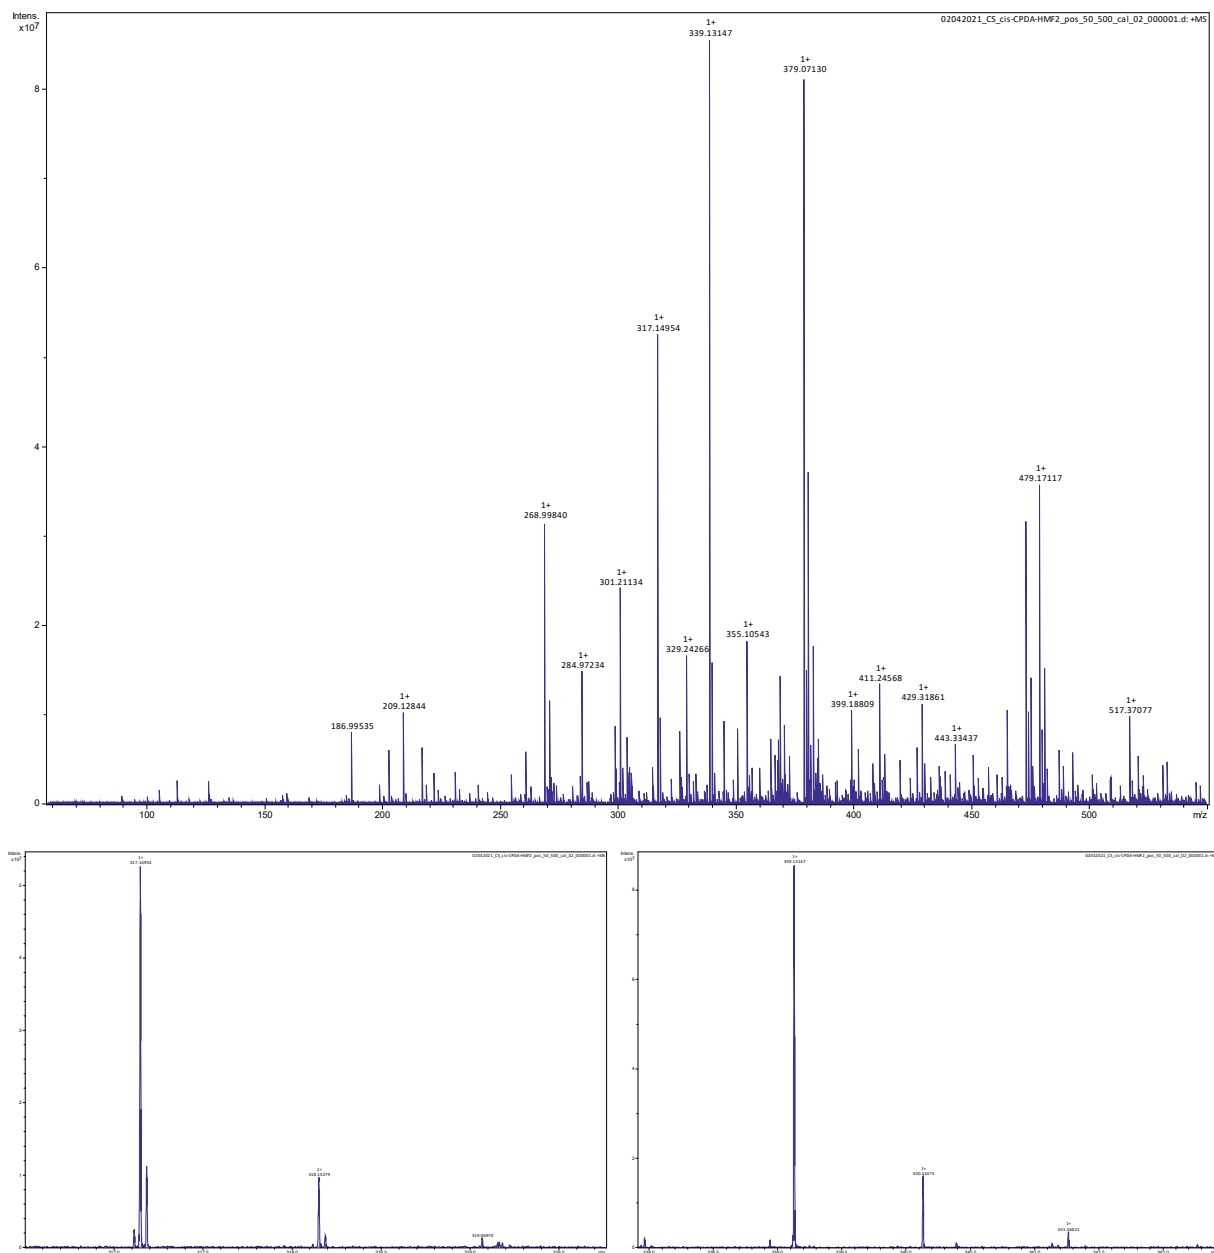

Figure S2.4.9: HR-MS analysis in ESI+ mode of **9**; full spectrum (top); zoom of  $[9 + H]^+$  (bottom-left), and zoom of  $[9 + Na]^+$  (bottom-right).

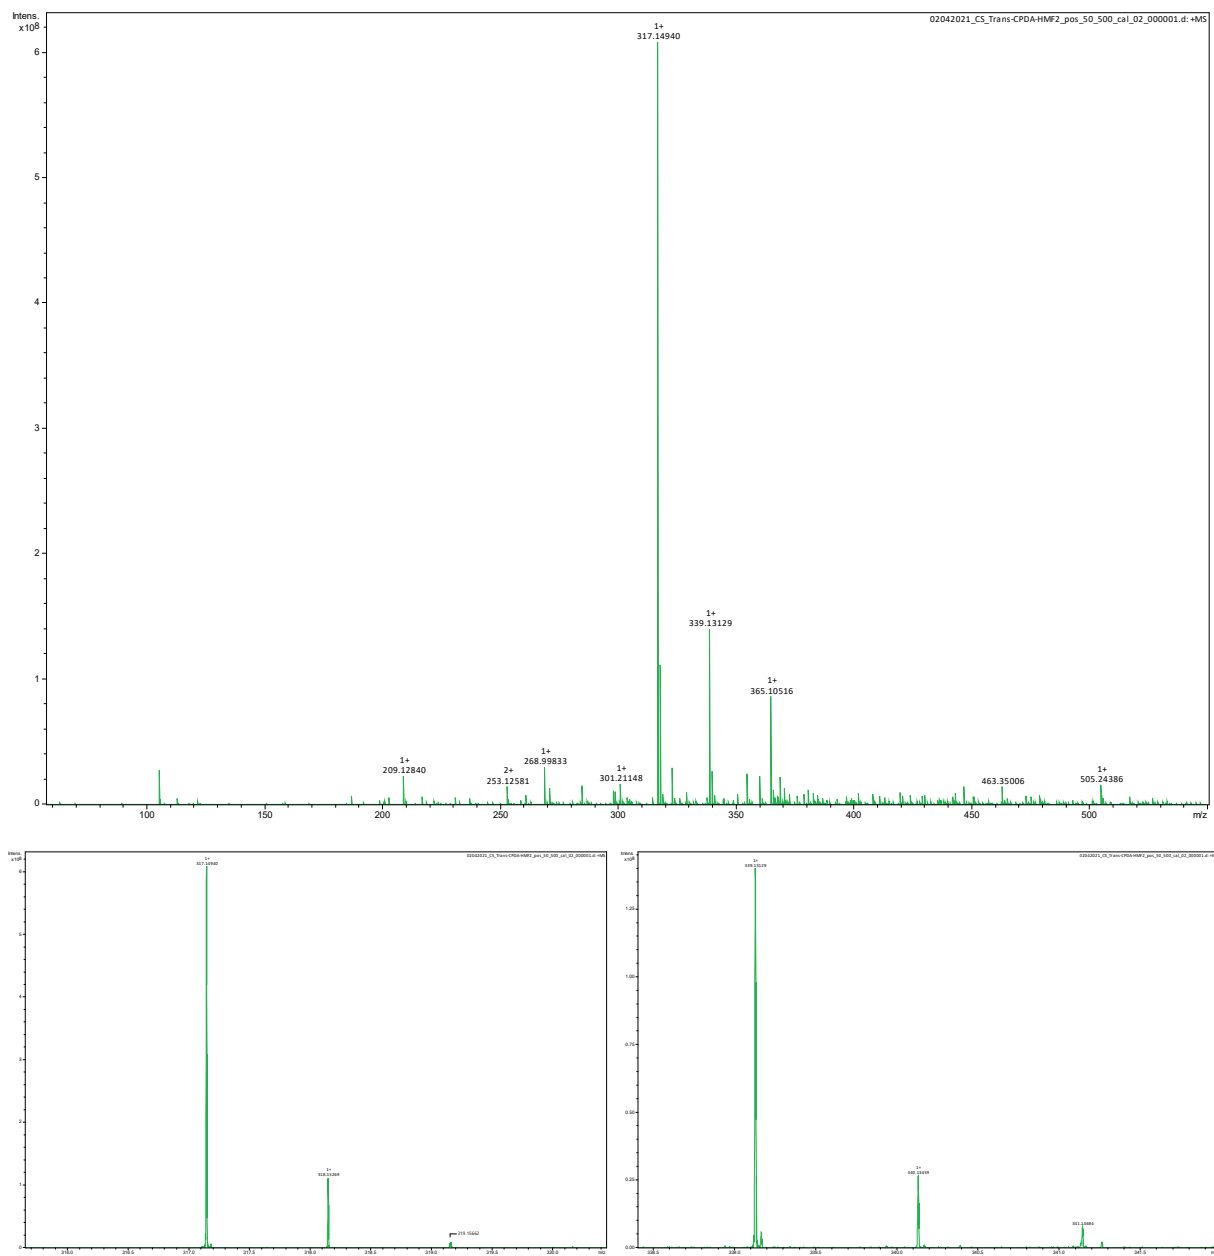

Figure S2.4.10: HR-MS analysis in ESI<sup>+</sup> mode of **10**; full spectrum (top); zoom of [10 + H]<sup>+</sup> (bottom-left), and zoom of [10 + Na]<sup>+</sup> (bottom-right).

S2.5 Gel permeation chromatography (GPC):

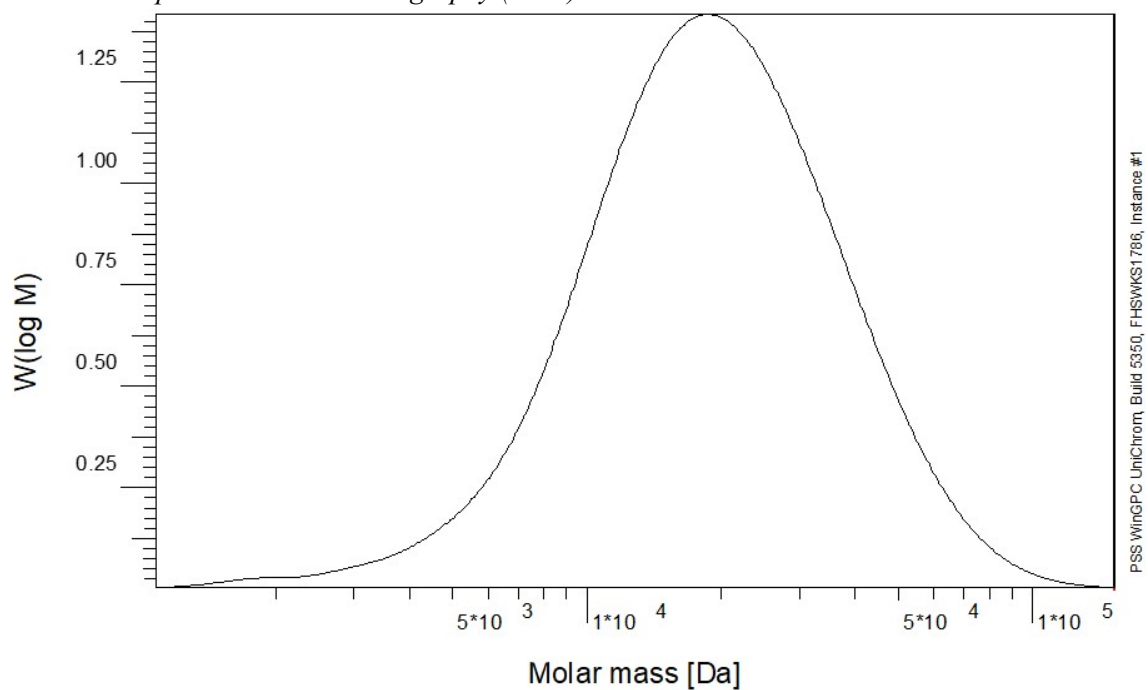

Figure S2.5.1: GPC chromatogram complementary to Table 3, entry 4.

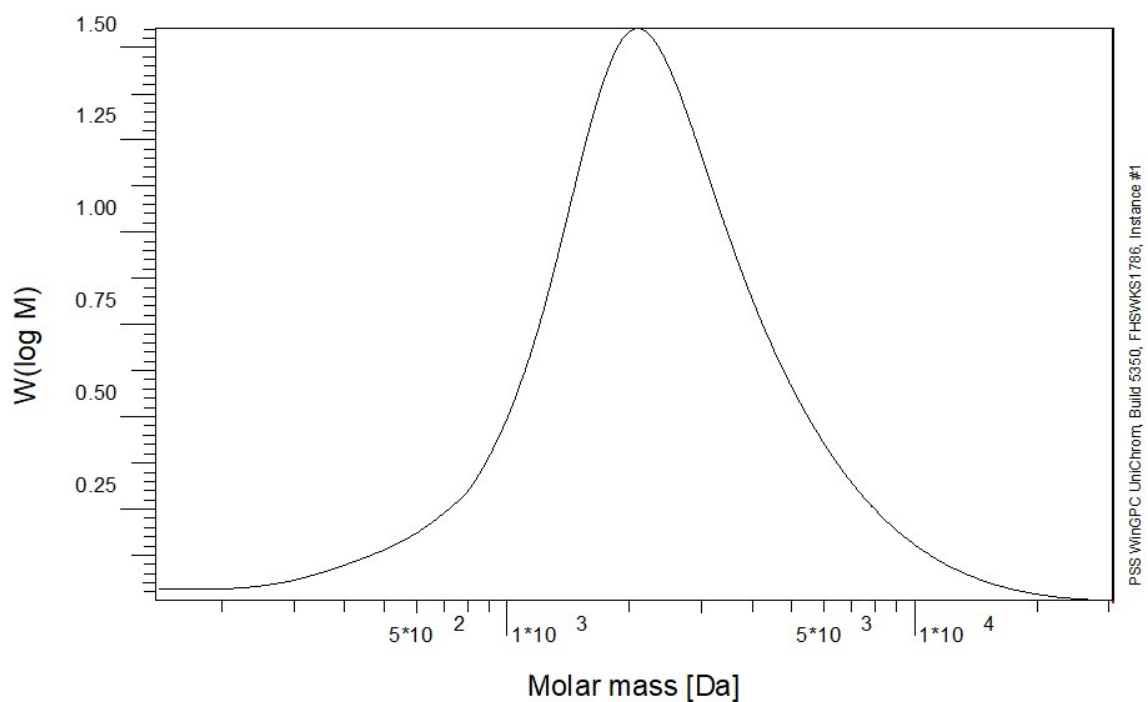

Figure S2.5.1: GPC chromatogram complementary to Table 3, entry 5.

## S2.6 Thermogravimetric analysis (TGA):

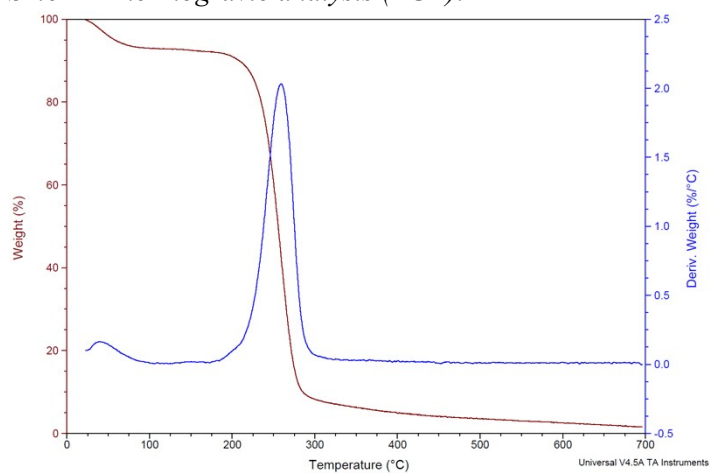

Figure S2.6.1: TGA plot complementary to Table 3, entry 3.

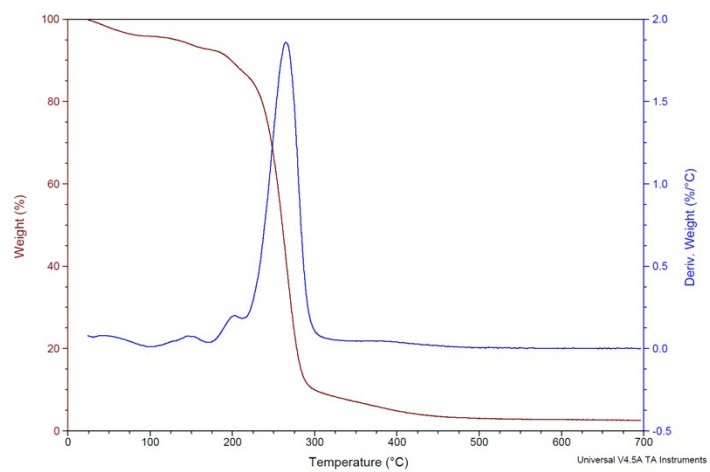

Figure S2.6.2: TGA plot complementary to Table 3, entry 4.

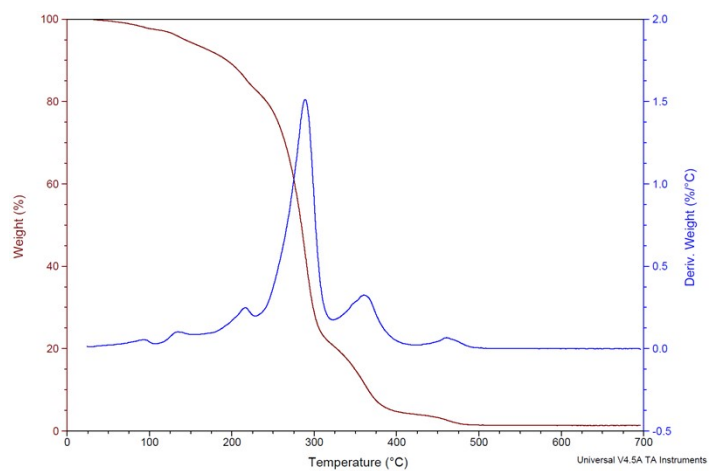

Figure S2.6.3: TGA plot complementary to Table 3, entry 5.

## S2.7 Differential Scanning Calorimetry (DSC):

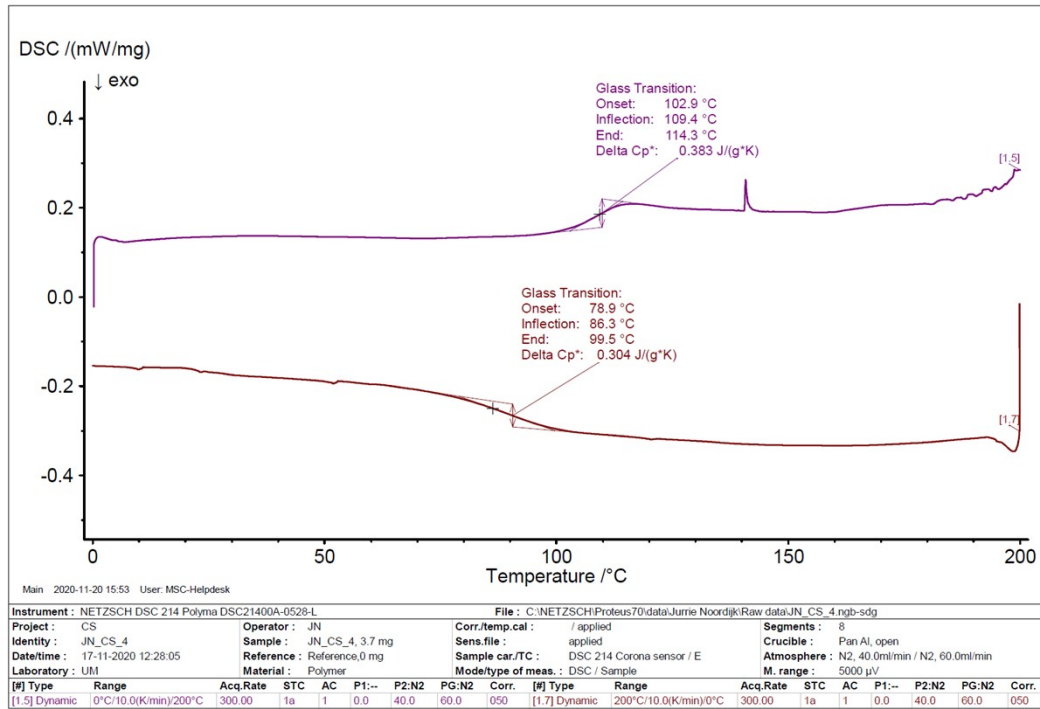

Figure S2.7.1: DSC plot complementary to Table 3, entry 3.

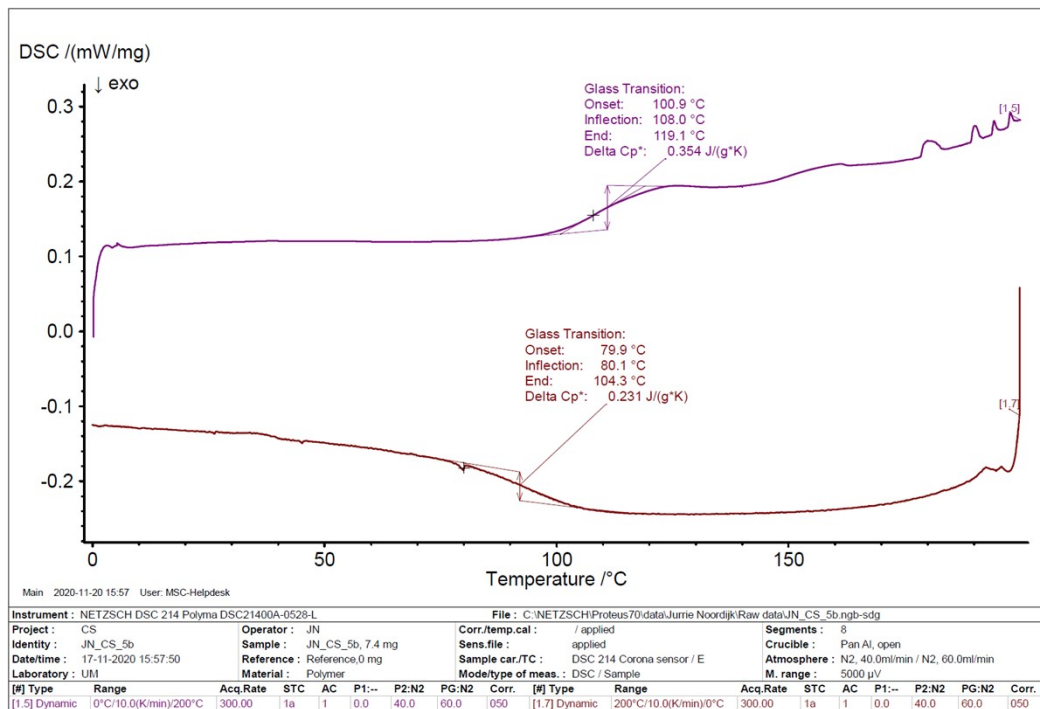

Figure S2.7.2: DSC plot complementary to Table 3, entry 4.

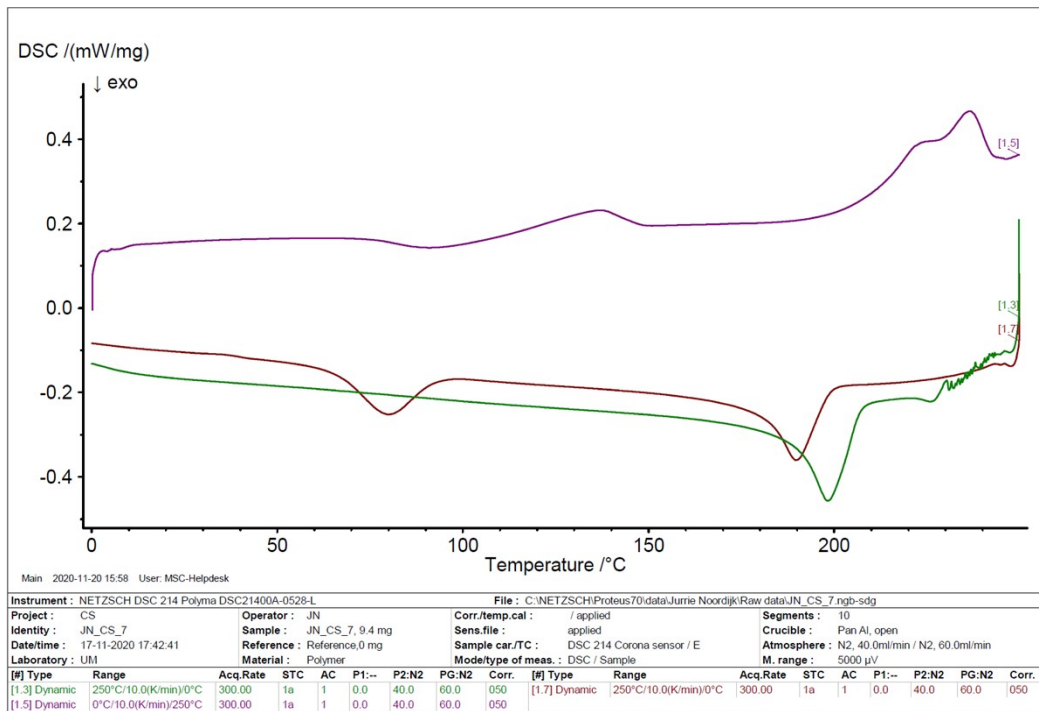

Figure S2.7.3: DSC plot complementary to Table 3, entry 5.
